# Supplementary material for: Diversity of Pseudomonas Genomes, Including Populus-Associated Isolates, as Revealed by Comparative Genome Analysis
Source: PubMed Central journal article supplement (PMC4702629; doi:10.1128/aem.02612-15), 2015-12-22
Supplement: AEM.02612-15_zam999116834so1.pdf [file AEM.02612-15_zam999116834so1.pdf]

1 Comparative genome analysis of *Pseudomonas* genomes including *Populus*-  
2 associated isolates

3  
4 Se-Ran Jun<sup>1</sup>, Trudy M. Wassenaar<sup>3</sup>, Intawat Nookaew<sup>2</sup>, Loren Hauser<sup>2</sup>, Visanu Wanchai<sup>2</sup>, Miriam  
5 Land<sup>2</sup>, Collin Timm<sup>2</sup>, Tse-Yuan S. Lu<sup>2</sup>, Christopher W. Schadt<sup>2</sup>, Mitchel J. Doktycz<sup>2</sup>, Dale A.  
6 Pelletier<sup>2</sup>, David W. Ussery<sup>2,#</sup>

7  
8 Running Head: Comparative *Pseudomonas* genome analysis

9 <sup>1</sup> Joint Institute for Computational Sciences, University of Tennessee, Knoxville, TN, USA

10 <sup>2</sup> Biosciences Division, Oak Ridge National Laboratories, Oak Ridge, TN, USA

11 <sup>3</sup> Molecular Microbiology and Genomics Consultants, Zotzenheim, Germany

12  
13  
14 #Address correspondence to David W. Ussery

15 Oak Ridge National Laboratory

16 Biosciences Division

17 Oak Ridge, TN 37831

18 Phone: (865) 574-8201

19 Fax: (865) 574-3555

20 Email: [usserydw@ornl.gov](mailto:usserydw@ornl.gov)

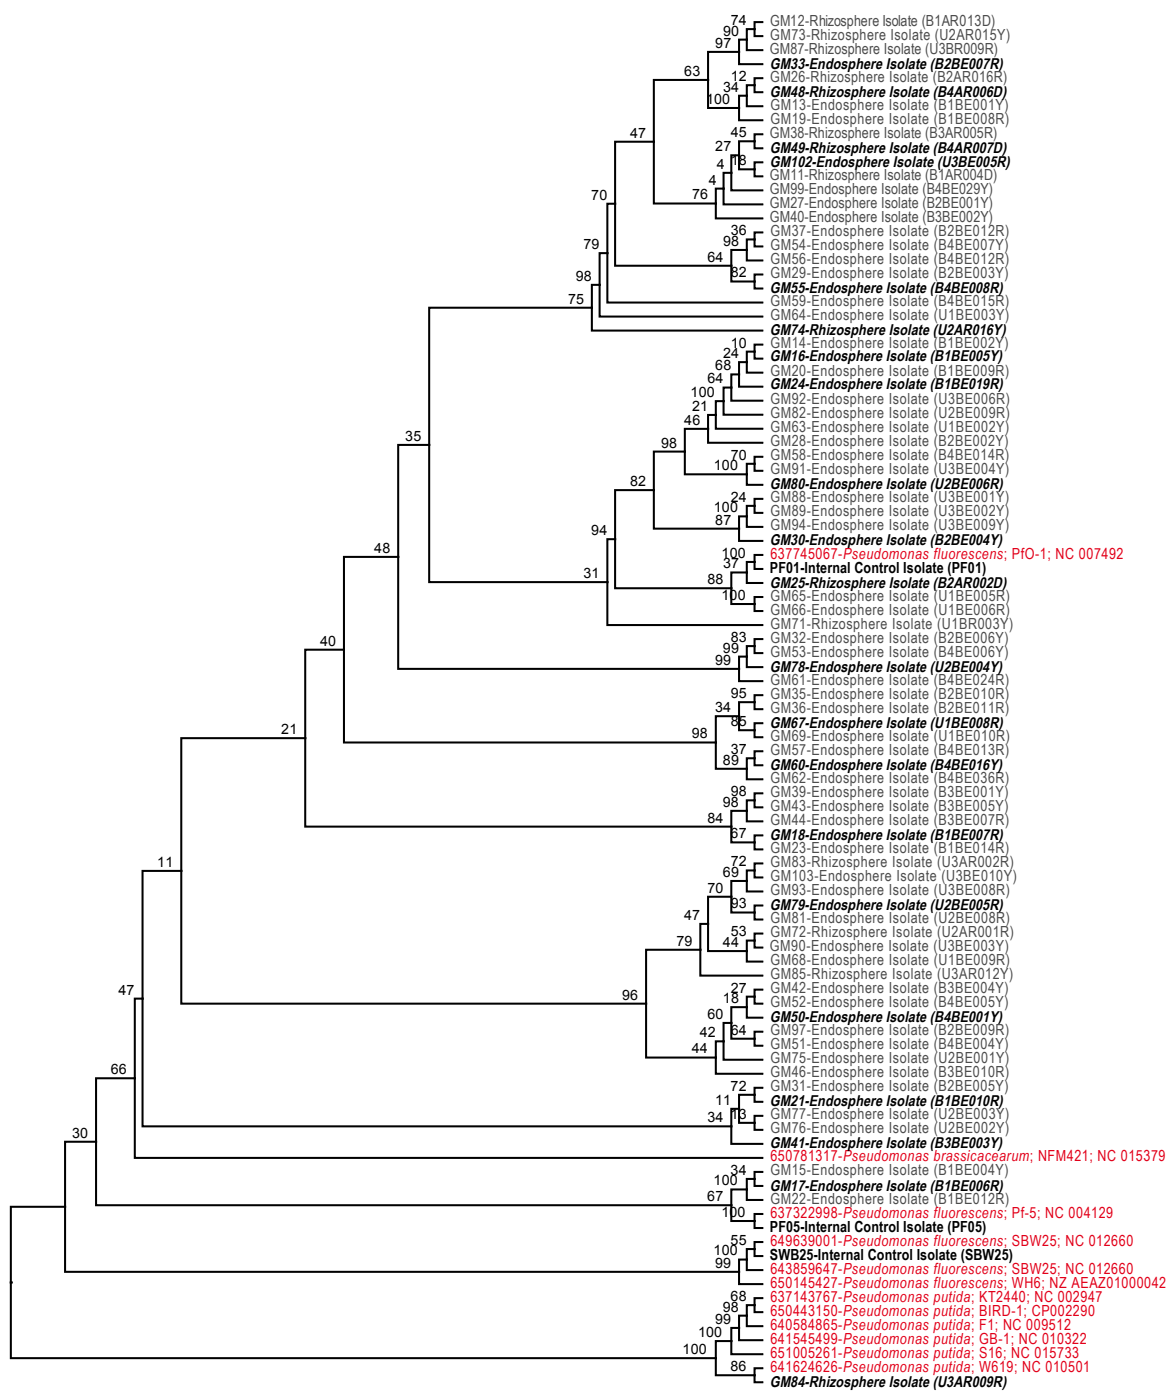

23  
24 **Figure S1.** Phylogenetic analysis of partial *rpoD* genes found in isolates of *Pseudomonas* from

25 *Populus deltoides* roots and selected references taxa (Maximum likelihood, bootstraps = 100).  
26 Genes from reference isolates are listed by their GI number. Strains from the current study are  
27 labeled to denote the compartment (endosphere or rhizosphere) and tree from which the  
28 isolate originated. Isolates representing diverse and well-supported groups were selected for  
29 complete genome sequence analysis, indicated in bold. Reference complete genomes are  
30 shown in red.

31

32

33

34

35

36

37

38

39

40

41

42

43

44

45

46

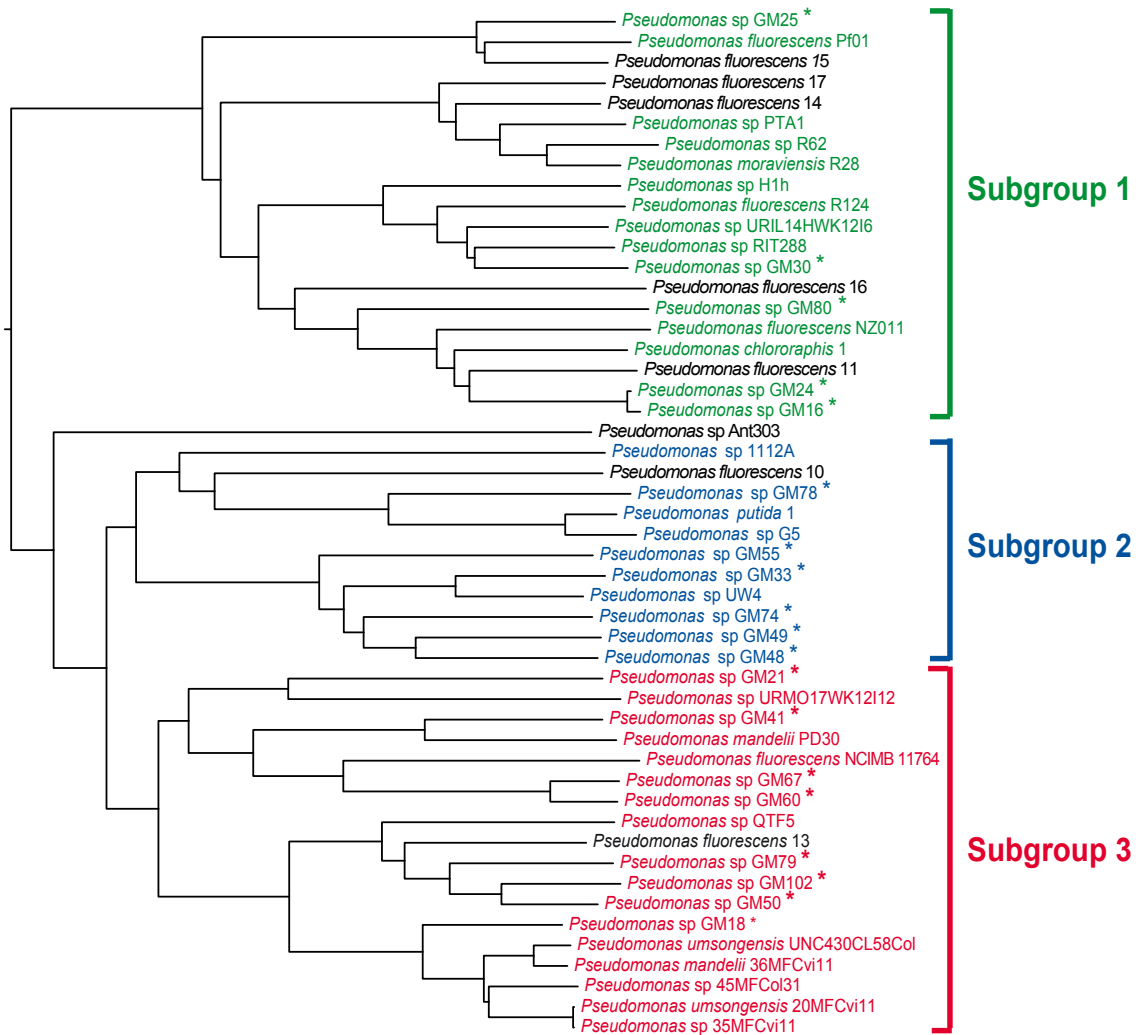

47

48 **Figure S2.** AAI-based tree of 19 *Populus*-associated *Pseudomonas* isolates and related  
 49 *Pseudomonas* species with newly sequenced *P. fluorescens* in black.

50

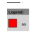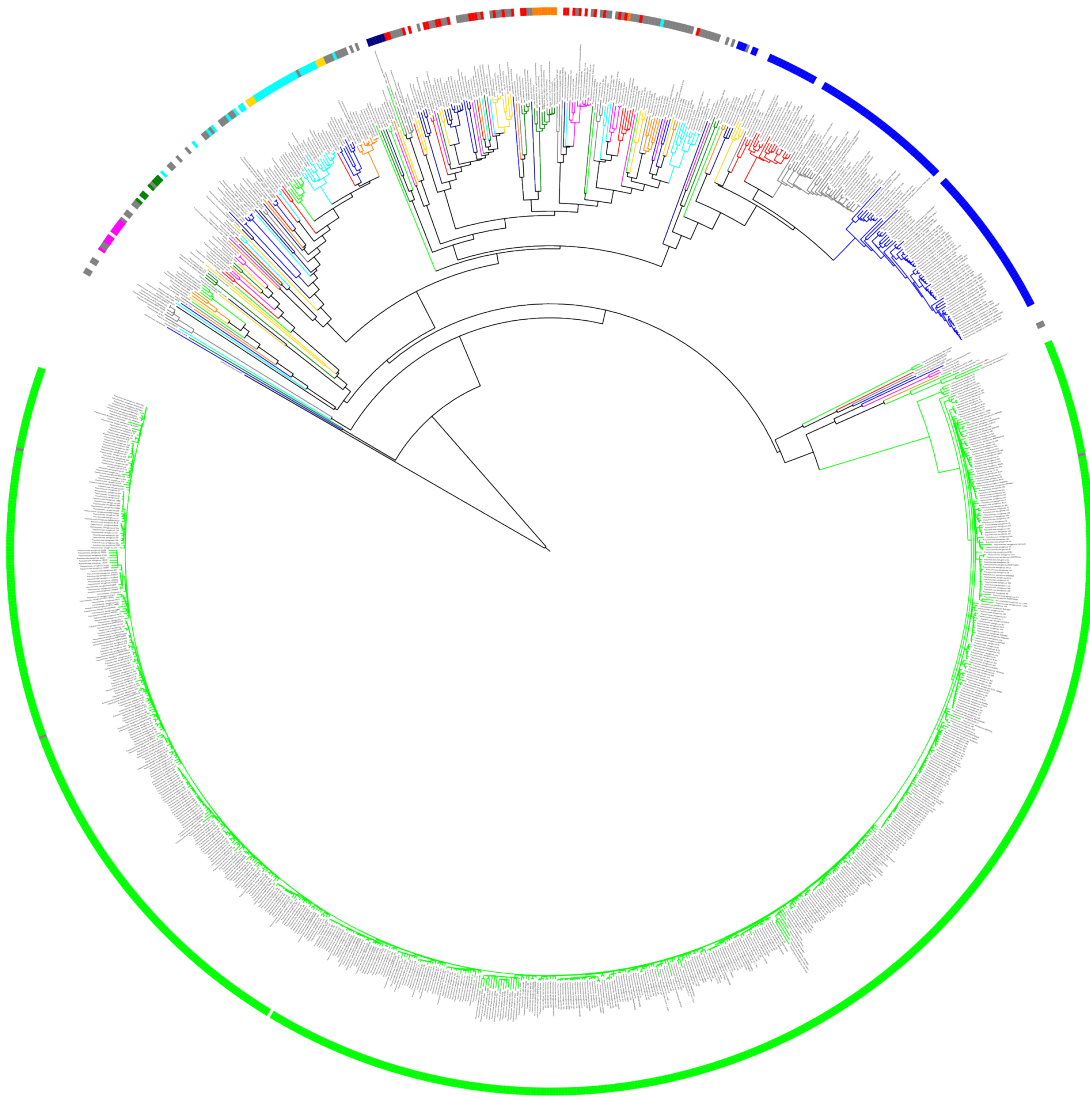

51

52 **Figure S3.** AAI-based tree of 1073 *Pseudomonas* genomes. The outer ring and branches are  
53 colored by *Pseudomonas* species groups defined by NCBI taxonomy.

54

55

56

57

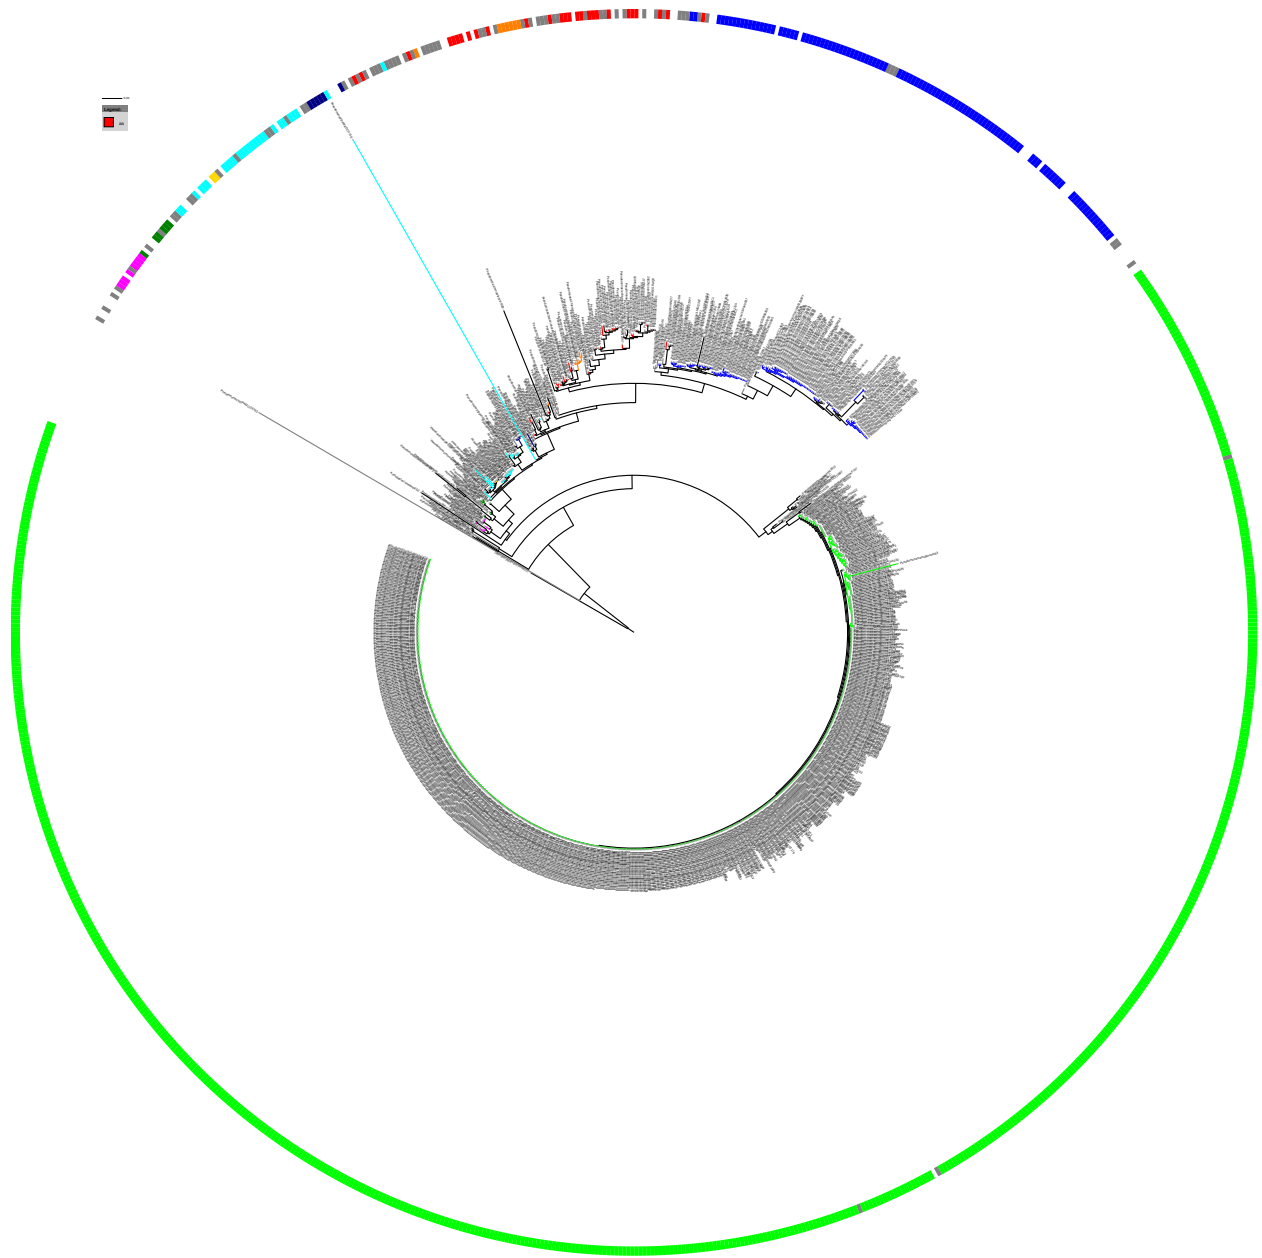

58

59 **Figure S4.** 16S-rRNA based tree. We considered only 16S rRNA genes (extracted by RNAmmer  
 60 v1.2 (1)) whose length is larger than 1400 nt-long, and chose one 16S rRNA gene whose length  
 61 is closest to 1500 when the multiple copies of 16S rRNA genes are present in the genomes,  
 62 resulting in 116 *Pseudomonas* without full-length 16S rRNA genes out of 1073 *Pseudomonas*  
 63 isolates. We aligned 16S rRNA genes using MAFFT (2), and applied FastTree (3) using a  
 64 combined model of generalized time-reversible and a single rate for each site (GTR+CAT model)

65 to approximate a 16S rRNA-based maximum likelihood tree. The outer ring and branches are  
66 colored by *Pseudomonas* species groups defined by NCBI taxonomy.

67

68

69

70

71

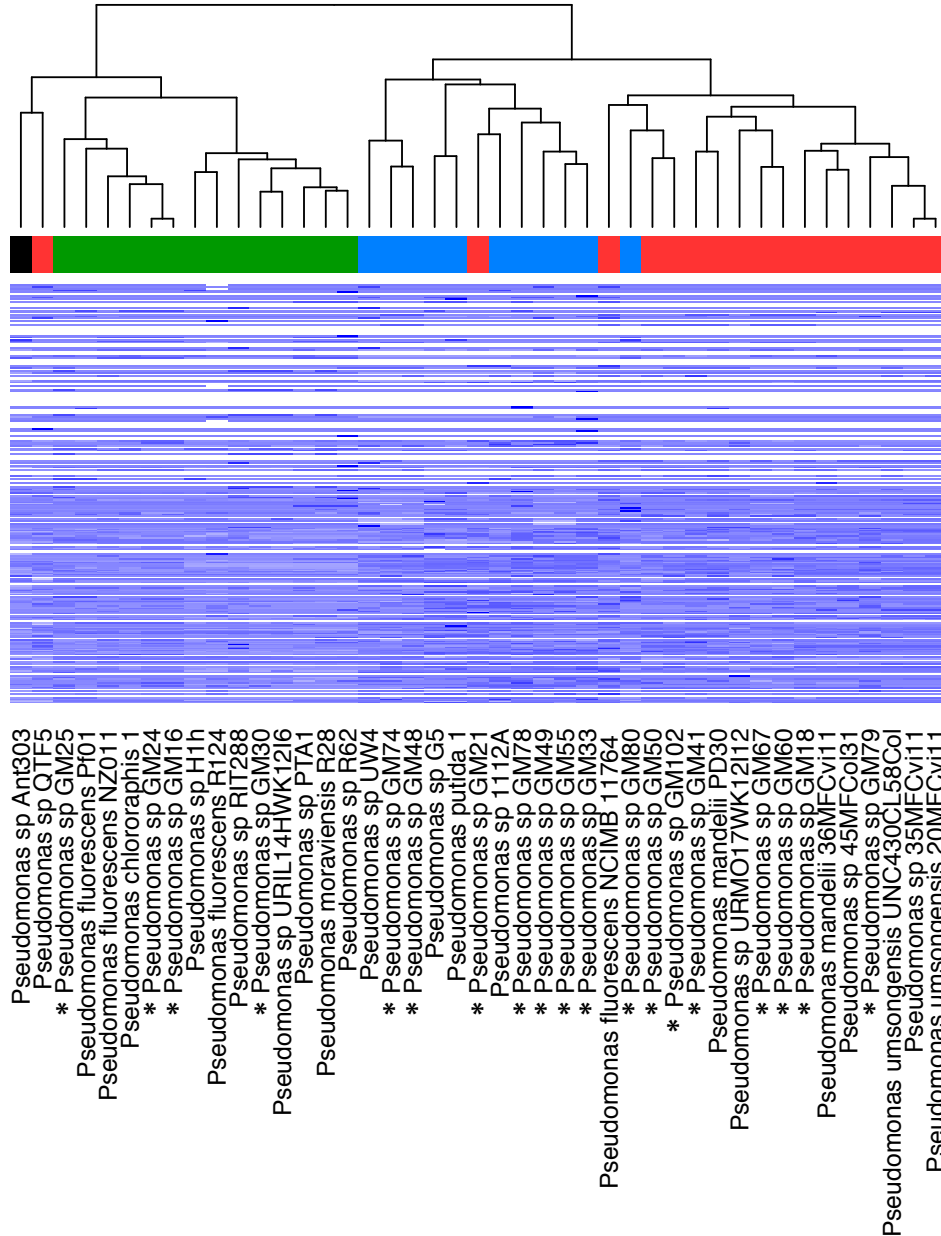

72

73 **Figure S5. Pathway profiles analysis of PMI *Pseudomonas* isolates.** The asterisk indicates PMI

74 *Pseudomonas* isolates. The color code at the X-axis corresponds to three distinct subgroups

75 identified in Figure 2.

76

77

78



79 **Table S1.** *Pseudomonas* dataset.

80

81 **Table S2.** Genomic clusters with at least five members.

| Genomic cluster Index | Cluster size | Species by NCBI Taxonomy                                                                                                                                                       |
|-----------------------|--------------|--------------------------------------------------------------------------------------------------------------------------------------------------------------------------------|
| Cluster_53            | 684          | <i>Pseudomonas aeruginosa</i> (680)<br><i>Pseudomonas otitidis</i> (1)<br><i>Pseudomonas sp</i> (3)                                                                            |
| Cluster_25            | 64           | <i>Pseudomonas syringae</i> (61)<br><i>Pseudomonas avellanae</i> (3)                                                                                                           |
| Cluster_23            | 33           | <i>Pseudomonas syringae</i> (33)                                                                                                                                               |
| Cluster_33            | 16           | <i>Pseudomonas putida</i> (15)<br><i>Pseudomonas monteilii</i> (1)                                                                                                             |
| Cluster_24            | 16           | <i>Pseudomonas syringae</i> (13)<br><i>Pseudomonas savastanoi</i> (3)                                                                                                          |
| Cluster_32            | 10           | <i>Pseudomonas monteilii</i> (3)<br><i>Pseudomonas putida</i> (1)<br><i>Pseudomonas sp</i> (6)                                                                                 |
| Cluster_10            | 9            | <i>Pseudomonas fluorescens</i> (4)<br><i>Pseudomonas brassicacearum</i> (3)<br><i>Pseudomonas sp</i> (2)                                                                       |
| Cluster_13            | 9            | <i>Pseudomonas chlororaphis</i> (8)<br><i>Pseudomonas sp</i> (1)                                                                                                               |
| Cluster_16            | 8            | <i>Pseudomonas fluorescens</i> (4)<br><i>Pseudomonas sp</i> (4)                                                                                                                |
| Cluster_14            | 8            | <i>Pseudomonas fluorescens</i> (3)<br><i>Pseudomonas simiae</i> (2)<br><i>Pseudomonas sp</i> (3)                                                                               |
| Cluster_34            | 8            | <i>Pseudomonas putida</i> (3)<br><i>Pseudomonas monteilii</i> (2)<br><i>Pseudomonas plecoglossicida</i> (1)<br><i>Pseudomonas taiwanensis</i> (1)<br><i>Pseudomonas sp</i> (1) |
| Cluster_31            | 7            | <i>Pseudomonas putida</i> (6)<br><i>Pseudomonas sp</i> (1)                                                                                                                     |
| Cluster_54            | 6            | <i>Pseudomonas psychrotolerans</i> (1)<br><i>Pseudomonas oryzihabitans</i> (1)<br><i>Pseudomonas oleovorans</i> (1)<br><i>Pseudomonas sp</i> (3)                               |
| Cluster_2             | 6            | <i>Pseudomonas umsongensis</i> (2)<br><i>Pseudomonas mandelii</i> (1)                                                                                                          |

|           |   |                                                                 |
|-----------|---|-----------------------------------------------------------------|
|           |   | <i>Pseudomonas sp</i> (3)                                       |
| Cluster_7 | 5 | <i>Pseudomonas fluorescens</i> (1)<br><i>Pseudomonas sp</i> (4) |
| Cluster_4 | 5 | <i>Pseudomonas sp</i> (5)                                       |

82

83 **Table S3. Membership of PMI *Pseudomonas* isolates into genomic clusters.**

| PMI <i>Pseudomonas</i> | Genomic cluster index | Cluster size | <i>Pseudomonas</i> species by NCBI taxonomy                                                            |
|------------------------|-----------------------|--------------|--------------------------------------------------------------------------------------------------------|
| GM60                   | Cluster_0             | 2            | <i>Pseudomonas sp</i> (2)                                                                              |
| GM67                   | Cluster_0             | 2            | <i>Pseudomonas sp</i> (2)                                                                              |
| GM41                   | Cluster_1             | 2            | <i>Pseudomonas mandelii</i> (1)<br><i>Pseudomonas sp</i> (1)                                           |
| GM18                   | Cluster_2             | 6            | <i>Pseudomonas umsongensis</i> (2)<br><i>Pseudomonas mandelii</i> (1)<br><i>Pseudomonas sp</i> (3)     |
| GM50                   | Cluster_3             | 4            | <i>Pseudomonas sp</i> (4)                                                                              |
| GM79                   | Cluster_3             | 4            | <i>Pseudomonas sp</i> (4)                                                                              |
| GM102                  | Cluster_3             | 4            | <i>Pseudomonas sp</i> (4)                                                                              |
| GM33                   | Cluster_4             | 3            | <i>Pseudomonas sp</i> (3)                                                                              |
| GM48                   | Cluster_4             | 5            | <i>Pseudomonas sp</i> (5)                                                                              |
| GM49                   | Cluster_4             | 5            | <i>Pseudomonas sp</i> (5)                                                                              |
| GM74                   | Cluster_4             | 5            | <i>Pseudomonas sp</i> (5)                                                                              |
| GM78                   | Cluster_5             | 3            | <i>Pseudomonas putida</i> (1)<br><i>Pseudomonas sp</i> (2)                                             |
| GM16                   | Cluster_6             | 4            | <i>Pseudomonas chlororaphis</i> (1)<br><i>Pseudomonas fluorescens</i> (1)<br><i>Pseudomonas sp</i> (2) |
| GM24                   | Cluster_6             | 4            | <i>Pseudomonas chlororaphis</i> (1)<br><i>Pseudomonas fluorescens</i> (1)<br><i>Pseudomonas sp</i> (2) |
| GM30                   | Cluster_7             | 5            | <i>Pseudomonas sp</i> (4)<br><i>Pseudomonas fluorescens</i> (1)                                        |
| GM25                   | Cluster_8             | 2            | <i>Pseudomonas fluorescens</i> (1)<br><i>Pseudomonas sp</i> (1)                                        |
| GM17                   | Cluster_13            | 9            | <i>Pseudomonas chlororaphis</i> (8)<br><i>Pseudomonas sp</i> (1)                                       |
| GM55                   | Singleton             | 1            | <i>Pseudomonas sp</i> (1)                                                                              |
| GM84                   | Singleton             | 1            | <i>Pseudomonas sp</i> (1)                                                                              |
| GM80                   | Singleton             | 1            | <i>Pseudomonas sp</i> (1)                                                                              |
| GM21                   | Singleton             | 1            | <i>Pseudomonas sp</i> (1)                                                                              |

84

85 **Table S4.** Subgroup-specific genes with annotation.

86

87 **REFERENCES**

88

- 89 1. **Lagesen K, Hallin P, Rodland EA, Staerfeldt H-H, Rognes T, Ussery DW.** 2007.  
90 RNAmmer: consistent and rapid annotation of ribosomal RNA genes. *Nucleic acids*  
91 *research* **35**:3100-3108.
- 92 2. **Katoh K, Standley DM.** 2013. MAFFT multiple sequence alignment software version 7:  
93 improvements in performance and usability. *Molecular biology and evolution* **30**:772-  
94 780.
- 95 3. **Price MN, Dehal PS, Arkin AP.** 2010. FastTree 2--approximately maximum-likelihood  
96 trees for large alignments. *PloS one* **5**:e9490.

97
