# Supplementary material for: Diversity of Pseudomonas Genomes, Including Populus-Associated Isolates, as Revealed by Comparative Genome Analysis
Source: PubMed Central journal article supplement (PMC4702629; doi:10.1128/aem.02612-15), 2015-12-22
Supplement: AEM.02612-15_zam999116834so2.pdf [file AEM.02612-15_zam999116834so2.pdf]

| Assembly ID   | Genomic cluster | Organism name                                                         | GC%  | Status          | Center                                                                     |
|---------------|-----------------|-----------------------------------------------------------------------|------|-----------------|----------------------------------------------------------------------------|
| GCA_000282435 | Cluster_0       | <i>Pseudomonas</i> sp. GM67                                           | 59.6 | Contig          | Oak Ridge National Lab                                                     |
| GCA_000282415 | Cluster_0       | <i>Pseudomonas</i> sp. GM60                                           | 59.6 | Contig          | Oak Ridge National Lab                                                     |
| GCA_000690555 | Cluster_1       | <i>Pseudomonas mandelii</i> PD30                                      | 59.0 | Contig          | University of Guelph SES                                                   |
| GCA_000282315 | Cluster_1       | <i>Pseudomonas</i> sp. GM41(2012)                                     | 59.0 | Contig          | Oak Ridge National Lab                                                     |
| GCA_000620285 | Cluster_2       | <i>Pseudomonas umsongensis</i> UNC430CL58Col                          | 59.3 | Scaffold        | DOE Joint Genome Institute                                                 |
| GCA_000382025 | Cluster_2       | <i>Pseudomonas</i> sp. 45MFCol3.1                                     | 59.4 | Scaffold        | DOE Joint Genome Institute                                                 |
| GCA_000381285 | Cluster_2       | <i>Pseudomonas mandelii</i> 36MFCvi1.1                                | 59.2 | Scaffold        | DOE Joint Genome Institute                                                 |
| GCA_000377725 | Cluster_2       | <i>Pseudomonas umsongensis</i> 20MFCvi1.1                             | 59.4 | Scaffold        | DOE Joint Genome Institute                                                 |
| GCA_000378525 | Cluster_2       | <i>Pseudomonas</i> sp. 35MFCvi1.1                                     | 59.4 | Scaffold        | DOE Joint Genome Institute                                                 |
| GCA_000282195 | Cluster_2       | <i>Pseudomonas</i> sp. GM18                                           | 59.5 | Contig          | Oak Ridge National Lab                                                     |
| GCA_000282375 | Cluster_3       | <i>Pseudomonas</i> sp. GM50                                           | 59.0 | Contig          | Oak Ridge National Lab                                                     |
| GCA_000512695 | Cluster_3       | <i>Pseudomonas</i> sp. QTF5                                           | 58.7 | Contig          | Tianjin Institute of Industrial Biotechnology, Chinese Academy of Sciences |
| GCA_000282495 | Cluster_3       | <i>Pseudomonas</i> sp. GM79                                           | 58.8 | Contig          | Oak Ridge National Lab                                                     |
| GCA_000282555 | Cluster_3       | <i>Pseudomonas</i> sp. GM102                                          | 59.0 | Contig          | Oak Ridge National Lab                                                     |
| GCA_000282455 | Cluster_4       | <i>Pseudomonas</i> sp. GM74                                           | 60.1 | Contig          | Oak Ridge National Lab                                                     |
| GCA_000282355 | Cluster_4       | <i>Pseudomonas</i> sp. GM49                                           | 59.6 | Contig          | Oak Ridge National Lab                                                     |
| GCA_000282335 | Cluster_4       | <i>Pseudomonas</i> sp. GM48                                           | 59.4 | Contig          | Oak Ridge National Lab                                                     |
| GCA_000316175 | Cluster_4       | <i>Pseudomonas</i> sp. UW4                                            | 60.1 | Complete Genome | University of Waterloo                                                     |
| GCA_000282295 | Cluster_4       | <i>Pseudomonas</i> sp. GM33                                           | 60.1 | Contig          | Oak Ridge National Lab                                                     |
| GCA_000282475 | Cluster_5       | <i>Pseudomonas</i> sp. GM78                                           | 60.2 | Contig          | Oak Ridge National Lab                                                     |
| GCA_000729805 | Cluster_5       | <i>Pseudomonas putida</i> 1                                           | 59.7 | Contig          | University of Groningen                                                    |
| GCA_000408945 | Cluster_5       | <i>Pseudomonas</i> sp. G5(2012)                                       | 59.3 | Contig          | Gwangju Institution of Science and Technology                              |
| GCA_000282155 | Cluster_6       | <i>Pseudomonas</i> sp. GM16                                           | 59.1 | Contig          | Oak Ridge National Lab                                                     |
| GCA_000783395 | Cluster_6       | <i>Pseudomonas chlororaphis</i> 1                                     | 59.2 | Contig          | University of Massachusetts Dartmouth                                      |
| GCA_000276585 | Cluster_6       | <i>Pseudomonas fluorescens</i> NZ011                                  | 58.5 | Contig          | The Sainsbury Laboratory                                                   |
| GCA_000282235 | Cluster_6       | <i>Pseudomonas</i> sp. GM24                                           | 59.1 | Contig          | Oak Ridge National Lab                                                     |
| GCA_000631985 | Cluster_7       | <i>Pseudomonas</i> sp. RIT288                                         | 60.0 | Contig          | Monash University Malaysia                                                 |
| GCA_000633255 | Cluster_7       | <i>Pseudomonas</i> sp. H1h                                            | 60.3 | Contig          | University of Malaya                                                       |
| GCA_000514195 | Cluster_7       | <i>Pseudomonas</i> sp. URIL14HWK12:16                                 | 60.0 | Scaffold        | DOE Joint Genome Institute                                                 |
| GCA_000282275 | Cluster_7       | <i>Pseudomonas</i> sp. GM30                                           | 60.3 | Contig          | Oak Ridge National Lab                                                     |
| GCA_000292795 | Cluster_7       | <i>Pseudomonas fluorescens</i> R124                                   | 60.3 | Chromosome      | Northern Kentucky University                                               |
| GCA_000012445 | Cluster_8       | <i>Pseudomonas fluorescens</i> Pf0-1                                  | 60.5 | Complete Genome | DOE Joint Genome Institute                                                 |
| GCA_000282255 | Cluster_8       | <i>Pseudomonas</i> sp. GM25                                           | 60.9 | Contig          | Oak Ridge National Lab                                                     |
| GCA_000512275 | Cluster_9       | <i>Pseudomonas moraviensis</i> R28                                    | -    | Chromosome      | University of Idaho                                                        |
| GCA_000745605 | Cluster_9       | <i>Pseudomonas</i> sp. PTA1                                           | 59.7 | Scaffold        | DOE Joint Genome Institute                                                 |
| GCA_000257605 | Cluster_9       | <i>Pseudomonas</i> sp. R62                                            | 60.0 | Scaffold        | Botanical Institute                                                        |
| GCA_000785375 | Cluster_10      | <i>Pseudomonas brassicacearum</i> PP1_210F                            | 60.9 | Scaffold        | CNRS - UPR2355                                                             |
| GCA_000498415 | Cluster_10      | <i>Pseudomonas fluorescens</i> S12                                    | 60.7 | Contig          | University of Malaya                                                       |
| GCA_000285615 | Cluster_10      | <i>Pseudomonas fluorescens</i> Wood1R                                 | 60.8 | Contig          | The Ohio State University                                                  |
| GCA_000194805 | Cluster_10      | <i>Pseudomonas brassicacearum</i> subsp. <i>brassicacearum</i> NFM421 | 60.8 | Complete Genome | CEA/DSV/IBeB/SBVME/LEMIRE                                                  |
| GCA_000263695 | Cluster_10      | <i>Pseudomonas fluorescens</i> Q8r1-96                                | 61.0 | Chromosome      | USDA - Agricultural Research Service, USA                                  |
| GCA_000416195 | Cluster_10      | <i>Pseudomonas</i> sp. CFII68                                         | 60.8 | Contig          | Boise State University                                                     |
| GCA_000514275 | Cluster_10      | <i>Pseudomonas</i> sp. URIL14HWK12:17                                 | 60.7 | Scaffold        | DOE Joint Genome Institute                                                 |
| GCA_000510785 | Cluster_10      | <i>Pseudomonas brassicacearum</i> 51MFCVI2.1                          | 61.0 | Scaffold        | JGI                                                                        |
| GCA_000237065 | Cluster_10      | <i>Pseudomonas fluorescens</i> F113                                   | 60.8 | Complete Genome | Universidad Autónoma de Madrid                                             |
| GCA_000774145 | Cluster_11      | <i>Pseudomonas mediterranea</i> CFBP 5447                             | 61.2 | Scaffold        | Parco Scientifico e tecnologico della Sicilia s.c.p.a.                     |
| GCA_000522485 | Cluster_11      | <i>Pseudomonas corrugata</i> CFBP 5454                                | 60.5 | Contig          | Parco Scientifico e tecnologico della Sicilia s.c.p.a.                     |
| GCA_000285955 | Cluster_12      | <i>Pseudomonas fluorescens</i> Wayne1 1                               | 63.3 | Contig          | The Ohio State University                                                  |

|               |            |                                                                  |      |                      |                                                                                                      |
|---------------|------------|------------------------------------------------------------------|------|----------------------|------------------------------------------------------------------------------------------------------|
| GCA_000012265 | Cluster_12 | <i>Pseudomonas protegens</i> PF-5                                | 63.3 | Complete Genome      | TIGR                                                                                                 |
| GCA_000397205 | Cluster_12 | <i>Pseudomonas protegens</i> CHA0                                | 63.4 | Complete Genome      | Georg-August-University Goettingen, Genomic and Applied Microbiology, Goettingen Genomics Laboratory |
| GCA_000285355 | Cluster_12 | <i>Pseudomonas fluorescens</i> Wayne1                            | 63.4 | Contig               | The Ohio State University                                                                            |
| GCA_000698865 | Cluster_13 | <i>Pseudomonas chlororaphis</i>                                  | 62.6 | Complete Genome      | University of Manitoba                                                                               |
| GCA_000282175 | Cluster_13 | <i>Pseudomonas</i> sp. GM17                                      | 62.8 | Contig               | Oak Ridge National Lab                                                                               |
| GCA_000506385 | Cluster_13 | <i>Pseudomonas chlororaphis</i> subsp. <i>aurantiaca</i> PB-St2  | 63.2 | Contig               | University of Tuebingen                                                                              |
| GCA_000512485 | Cluster_13 | <i>Pseudomonas chlororaphis</i> YL-1                             | 63.1 | Scaffold             | Jiangsu Institute of Plant Protection                                                                |
| GCA_000237045 | Cluster_13 | <i>Pseudomonas chlororaphis</i> subsp. <i>chlororaphis</i> GP72  | 63.1 | Contig               | Shanghai Jiao Tong University                                                                        |
| GCA_000761195 | Cluster_13 | <i>Pseudomonas chlororaphis</i> subsp. <i>aurantiaca</i>         | 62.8 | Complete Genome      | Shanghai Normal University                                                                           |
| GCA_000264555 | Cluster_13 | <i>Pseudomonas chlororaphis</i> O6                               | 62.9 | Chromosome           | U.S. Department of Agriculture, Agricultural Research Service                                        |
| GCA_000597925 | Cluster_13 | <i>Pseudomonas chlororaphis</i> HT66                             | 62.6 | Contig               | Shanghai JiaoTong University                                                                         |
| GCA_000281915 | Cluster_13 | <i>Pseudomonas chlororaphis</i> subsp. <i>aureofaciens</i> 30-84 | 62.9 | Chromosome           | USDA - Agricultural Research Service, USA                                                            |
| GCA_000465595 | Cluster_14 | <i>Pseudomonas fluorescens</i> EGD-AQ6                           | 60.5 | Contig               | National Environmental Engineering Research Institute-CSIR                                           |
| GCA_000510895 | Cluster_14 | <i>Pseudomonas</i> sp. FH1                                       | 60.1 | Contig               | University of Exeter                                                                                 |
| GCA_000698265 | Cluster_14 | <i>Pseudomonas simiae</i>                                        | 60.3 | Chromosome with gaps | Utrecht University, Utrecht, NETHERLANDS                                                             |
| GCA_000785125 | Cluster_14 | <i>Pseudomonas simiae</i> 1                                      | 60.3 | Scaffold             | Agriculture and Agri-Food Canada                                                                     |
| GCA_000275925 | Cluster_14 | <i>Pseudomonas fluorescens</i> NZ052                             | 60.1 | Contig               | The Sainsbury Laboratory                                                                             |
| GCA_000257625 | Cluster_14 | <i>Pseudomonas</i> sp. R81                                       | 60.5 | Scaffold             | Botanical Institute                                                                                  |
| GCA_000411675 | Cluster_14 | <i>Pseudomonas fluorescens</i> LMG 5329                          | 60.5 | Contig               | Centre of Microbial and Plant Genetics (CMPG), University of Leuven                                  |
| GCA_000503215 | Cluster_14 | <i>Pseudomonas</i> sp. 2-92(2010)                                | 60.4 | Scaffold             | Agriculture and Agri-Food Canada                                                                     |
| GCA_000276565 | Cluster_15 | <i>Pseudomonas tolaasii</i> PMS117                               | 60.3 | Contig               | University of Exeter                                                                                 |
| GCA_000316215 | Cluster_15 | <i>Pseudomonas tolaasii</i> 6264                                 | 61.0 | Contig               | Chungbuk National University                                                                         |
| GCA_000511155 | Cluster_16 | <i>Pseudomonas fluorescens</i> FH5                               | 60.0 | Contig               | University of Exeter                                                                                 |
| GCA_000698295 | Cluster_16 | <i>Pseudomonas</i> sp. WCS374                                    | 60.0 | Chromosome with gaps | Utrecht University, Utrecht, NETHERLANDS                                                             |
| GCA_000262325 | Cluster_16 | <i>Pseudomonas fluorescens</i> AS06                              | 59.9 | Complete Genome      | USDA-ARS                                                                                             |
| GCA_000263675 | Cluster_16 | <i>Pseudomonas fluorescens</i> SS101                             | 60.0 | Chromosome           | USDA - Agricultural Research Service, USA                                                            |
| GCA_000416175 | Cluster_16 | <i>Pseudomonas</i> sp. CF150                                     | 59.8 | Contig               | Boise State University                                                                               |
| GCA_000416255 | Cluster_16 | <i>Pseudomonas</i> sp. CFT9                                      | 59.8 | Contig               | Boise State University                                                                               |
| GCA_000785395 | Cluster_16 | <i>Pseudomonas fluorescens</i> PA4C2                             | 60.2 | Scaffold             | CNRS - UPR2355                                                                                       |
| GCA_000744215 | Cluster_16 | <i>Pseudomonas</i> sp. Eur1 9.41                                 | 60.0 | Contig               | DOE Joint Genome Institute                                                                           |
| GCA_000737955 | Cluster_17 | <i>Pseudomonas</i> sp. BRG-100                                   | 59.6 | Contig               | Agriculture and Agri-Food Canada                                                                     |
| GCA_000263715 | Cluster_17 | <i>Pseudomonas synxantha</i> BG33R                               | 59.7 | Chromosome           | USDA - Agricultural Research Service, USA                                                            |
| GCA_000336465 | Cluster_18 | <i>Pseudomonas poae</i> RE1-1-14                                 | 60.8 | Complete Genome      | Graz University of Technology                                                                        |
| GCA_000334015 | Cluster_18 | <i>Pseudomonas fluorescens</i> BRIP34879                         | 60.9 | Scaffold             | CSIRO                                                                                                |
| GCA_000313235 | Cluster_19 | <i>Pseudomonas</i> sp. PAMC 26793                                | 60.6 | Contig               | Korea Polar Research Institute                                                                       |
| GCA_000242655 | Cluster_19 | <i>Pseudomonas</i> sp. PAMC 25886                                | 61.2 | Contig               | Korea Polar Research Institute                                                                       |
| GCA_000297195 | Cluster_19 | <i>Pseudomonas fluorescens</i> BBc6R8                            | 61.0 | Contig               | Institut National de la Recherche Agronomique                                                        |
| GCA_000278565 | Cluster_19 | <i>Pseudomonas</i> sp. Ag1                                       | 60.5 | Contig               | New Mexico State University                                                                          |
| GCA_000510915 | Cluster_20 | <i>Pseudomonas</i> sp. FH4                                       | 60.1 | Contig               | University of Exeter                                                                                 |
| GCA_000708695 | Cluster_20 | <i>Pseudomonas fluorescens</i>                                   | 60.5 | Contig               | Vrije Universiteit Brussel                                                                           |
| GCA_000251185 | Cluster_21 | <i>Pseudomonas fuscovaginae</i> UPB0736                          | 61.5 | Scaffold             | University of Exeter                                                                                 |
| GCA_000467065 | Cluster_21 | <i>Pseudomonas fuscovaginae</i> ICMP 5940                        | 61.2 | Contig               | Charles Sturt University                                                                             |
| GCA_000467005 | Cluster_21 | <i>Pseudomonas fuscovaginae</i> DAR 77795                        | 61.3 | Contig               | Charles Sturt University                                                                             |
| GCA_000280575 | Cluster_21 | <i>Pseudomonas fuscovaginae</i> CB98818                          | 61.4 | Contig               | Zhejiang University                                                                                  |
| GCA_000250595 | Cluster_22 | <i>Pseudomonas fragi</i> A22                                     | 58.6 | Scaffold             | BGI                                                                                                  |
| GCA_000346225 | Cluster_22 | <i>Pseudomonas</i> sp. Lz4W                                      | 58.7 | Contig               | Centre for Cellular and Molecular Biology                                                            |
| GCA_000331385 | Cluster_23 | <i>Pseudomonas syringae</i> pv. <i>syringae</i> B64              | 59.0 | Chromosome           | Institute of Plant Biology, University of Zurich                                                     |
| GCA_000452805 | Cluster_23 | <i>Pseudomonas syringae</i> CC1458                               | 59.1 | Contig               | University of Arizona                                                                                |
| GCA_000452925 | Cluster_23 | <i>Pseudomonas syringae</i> CC94                                 | 59.3 | Contig               | University of Arizona                                                                                |

|               |            |                                                            |      |                 |                                                                                |
|---------------|------------|------------------------------------------------------------|------|-----------------|--------------------------------------------------------------------------------|
| GCA_000597765 | Cluster_23 | <i>Pseudomonas syringae</i> DSM 10604                      | 59.0 | Contig          | Institute of Microbial Technology                                              |
| GCA_000282735 | Cluster_23 | <i>Pseudomonas syringae</i> pv. panici str. LMG 2367       | 59.0 | Contig          | Zhejiang University                                                            |
| GCA_000177515 | Cluster_23 | <i>Pseudomonas syringae</i> pv. syringae 642               | 59.2 | Contig          | Virginia Tech                                                                  |
| GCA_000412165 | Cluster_23 | <i>Pseudomonas syringae</i> pv. syringae SM                | 59.0 | Chromosome      | Institute of Plant Biology, University of Zurich                               |
| GCA_000145825 | Cluster_23 | <i>Pseudomonas syringae</i> Cit 7                          | 59.4 | Scaffold        | University of North Carolina at Chapel Hill                                    |
| GCA_000334055 | Cluster_23 | <i>Pseudomonas syringae</i> BRIP34881                      | 58.9 | Scaffold        | CSIRO                                                                          |
| GCA_000800685 | Cluster_23 | <i>Pseudomonas syringae</i> 4                              | 59.2 | Contig          | BIG                                                                            |
| GCA_000452585 | Cluster_23 | <i>Pseudomonas syringae</i> CC457                          | 59.1 | Contig          | University of Arizona                                                          |
| GCA_000452605 | Cluster_23 | <i>Pseudomonas syringae</i> CC440                          | 59.1 | Contig          | University of Arizona                                                          |
| GCA_000145805 | Cluster_23 | <i>Pseudomonas syringae</i> pv. pisi str. 1704B            | 58.7 | Scaffold        | University of North Carolina at Chapel Hill                                    |
| GCA_000498595 | Cluster_23 | <i>Pseudomonas syringae</i> pv. atrofaciens str. DSM 50255 | 59.2 | Contig          | University of Arizona                                                          |
| GCA_000452725 | Cluster_23 | <i>Pseudomonas syringae</i> CC1543                         | 59.2 | Contig          | University of Arizona                                                          |
| GCA_000163315 | Cluster_23 | <i>Pseudomonas syringae</i> pv. syringae FF5               | 59.0 | Scaffold        | The Sainsbury Laboratory                                                       |
| GCA_000737225 | Cluster_23 | <i>Pseudomonas syringae</i> 1                              | 59.3 | Contig          | University of Arizona                                                          |
| GCA_000452445 | Cluster_23 | <i>Pseudomonas syringae</i> pv. pisi str. PP1              | 58.8 | Contig          | University of Arizona                                                          |
| GCA_000585725 | Cluster_23 | <i>Pseudomonas syringae</i> pv. syringae str. B301D-R      | 59.2 | Contig          | Institute of Plant Biology, University of Zurich                               |
| GCA_000334035 | Cluster_23 | <i>Pseudomonas syringae</i> BRIP34876                      | 58.9 | Scaffold        | CSIRO                                                                          |
| GCA_000302815 | Cluster_23 | <i>Pseudomonas syringae</i> pv. avellanae str. ISPaVe037   | 59.2 | Scaffold        | University of Toronto Centre for the Analysis of Genome Evolution and Function |
| GCA_000452525 | Cluster_23 | <i>Pseudomonas syringae</i> USA011                         | 59.2 | Contig          | University of Arizona                                                          |
| GCA_000012245 | Cluster_23 | <i>Pseudomonas syringae</i> pv. syringae B728a             | 59.2 | Complete Genome | DOE Joint Genome Institute                                                     |
| GCA_000710085 | Cluster_23 | <i>Pseudomonas syringae</i> pv. atrofaciens LMG 5095       | 58.9 | Contig          | Chungbuk National University                                                   |
| GCA_000145905 | Cluster_23 | <i>Pseudomonas syringae</i> pv. aptata str. DSM 50252      | 59.1 | Scaffold        | University of North Carolina at Chapel Hill                                    |
| GCA_000333995 | Cluster_23 | <i>Pseudomonas syringae</i> BRIP39023                      | 59.2 | Scaffold        | CSIRO                                                                          |
| GCA_000507185 | Cluster_23 | <i>Pseudomonas syringae</i> KCTC 12500                     | 59.0 | Scaffold        | KRIBB                                                                          |
| GCA_000738515 | Cluster_23 | <i>Pseudomonas syringae</i> pv. syringae                   | 59.2 | Scaffold        | University of Exeter                                                           |
| GCA_000145925 | Cluster_23 | <i>Pseudomonas syringae</i> pv. aceris str. M302273PT      | 59.1 | Scaffold        | University of North Carolina at Chapel Hill                                    |
| GCA_000145785 | Cluster_23 | <i>Pseudomonas syringae</i> pv. japonica str. M301072PT    | 58.9 | Scaffold        | University of North Carolina at Chapel Hill                                    |
| GCA_000302795 | Cluster_23 | <i>Pseudomonas syringae</i> pv. avellanae str. ISPaVe013   | 59.1 | Scaffold        | University of Toronto Centre for the Analysis of Genome Evolution and Function |
| GCA_000452465 | Cluster_23 | <i>Pseudomonas syringae</i> pv. syringae 1212              | 59.1 | Contig          | University of Arizona                                                          |
| GCA_000452565 | Cluster_23 | <i>Pseudomonas syringae</i> UB303                          | 59.2 | Contig          | University of Arizona                                                          |
| GCA_000146005 | Cluster_24 | <i>Pseudomonas syringae</i> pv. lachrymans str. M301315    | 56.9 | Scaffold        | University of North Carolina at Chapel Hill                                    |
| GCA_000732035 | Cluster_24 | <i>Pseudomonas savastanoi</i> pv. savastanoi               | 57.9 | Contig          | International Centre for Genetic Engineering and Biotechnology                 |
| GCA_000751155 | Cluster_24 | <i>Pseudomonas savastanoi</i> pv. savastanoi 1             | 57.9 | Contig          | ICGEB                                                                          |
| GCA_000012205 | Cluster_24 | <i>Pseudomonas syringae</i> pv. phaseolicola 1448A         | 57.9 | Complete Genome | Cornell University                                                             |
| GCA_000145945 | Cluster_24 | <i>Pseudomonas syringae</i> pv. tabaci ATCC 11528          | 58.1 | Scaffold        | University of North Carolina at Chapel Hill                                    |
| GCA_000145765 | Cluster_24 | <i>Pseudomonas syringae</i> pv. mori str. 301020           | 57.8 | Scaffold        | University of North Carolina at Chapel Hill                                    |
| GCA_000187065 | Cluster_24 | <i>Pseudomonas syringae</i> pv. glycinea str. race 4       | 58.0 | Contig          | University of Illinois at Urbana & Champaign                                   |
| GCA_000187045 | Cluster_24 | <i>Pseudomonas syringae</i> pv. glycinea str. B076         | 57.8 | Contig          | University of Illinois at Urbana & Champaign                                   |
| GCA_000159835 | Cluster_24 | <i>Pseudomonas syringae</i> pv. tabaci str. ATCC 11528     | 58.0 | Scaffold        | The Sainsbury Laboratory                                                       |
| GCA_000275945 | Cluster_24 | <i>Pseudomonas syringae</i> pv. tabaci str. 6605           | 58.0 | Contig          | University of Exeter                                                           |
| GCA_000163255 | Cluster_24 | <i>Pseudomonas syringae</i> pv. aesculi str. NCPPB 3681    | 58.3 | Scaffold        | The Sainsbury Laboratory                                                       |
| GCA_000145685 | Cluster_24 | <i>Pseudomonas syringae</i> pv. aesculi str. 0893_23       | 58.3 | Scaffold        | University of North Carolina at Chapel Hill                                    |
| GCA_000143005 | Cluster_24 | <i>Pseudomonas syringae</i> pv. glycinea str. race 4 1     | 58.0 | Scaffold        | University of North Carolina at Chapel Hill                                    |
| GCA_000164015 | Cluster_24 | <i>Pseudomonas savastanoi</i> pv. savastanoi NCPPB 3335    | 57.9 | Chromosome      | University of Wisconsin-Madison                                                |
| GCA_000225805 | Cluster_24 | <i>Pseudomonas syringae</i> pv. phaseolicola 1644R         | 58.0 | Scaffold        | University of North Carolina                                                   |
| GCA_000163275 | Cluster_24 | <i>Pseudomonas syringae</i> pv. aesculi str. 2250          | 58.3 | Scaffold        | The Sainsbury Laboratory                                                       |
| GCA_000245475 | Cluster_25 | <i>Pseudomonas syringae</i> pv. actinidiae CH2010-6        | 58.5 | Scaffold        | University of Exeter                                                           |
| GCA_000344415 | Cluster_25 | <i>Pseudomonas syringae</i> ICMP 18806                     | 58.7 | Contig          | University of Otago                                                            |
| GCA_000416465 | Cluster_25 | <i>Pseudomonas syringae</i> pv. theae ICMP 3923            | 58.6 | Contig          | The New Zealand Institute for Plant & Food Research Limited                    |

|               |            |                                                                     |      |                 |                                                                                |
|---------------|------------|---------------------------------------------------------------------|------|-----------------|--------------------------------------------------------------------------------|
| GCA_000344515 | Cluster_25 | <i>Pseudomonas syringae</i> pv. <i>actinidiae</i> ICMP 19455        | 58.5 | Contig          | University of Otago                                                            |
| GCA_000416785 | Cluster_25 | <i>Pseudomonas syringae</i> pv. <i>actinidiae</i> ICMP 18883        | 58.7 | Contig          | The New Zealand Institute for Plant & Food Research Limited                    |
| GCA_000344535 | Cluster_25 | <i>Pseudomonas syringae</i> pv. <i>actinidiae</i> ICMP 18807        | 58.8 | Contig          | University of Otago                                                            |
| GCA_000145885 | Cluster_25 | <i>Pseudomonas syringae</i> pv. <i>lachrymans</i> str. M302278PT    | 58.6 | Scaffold        | University of North Carolina at Chapel Hill                                    |
| GCA_000416585 | Cluster_25 | <i>Pseudomonas syringae</i> pv. <i>actinidiae</i> ICMP 19101        | 58.4 | Contig          | The New Zealand Institute for Plant & Food Research Limited                    |
| GCA_000344335 | Cluster_25 | <i>Pseudomonas syringae</i> pv. <i>actinidiae</i> ICMP 9853         | 58.8 | Contig          | University of Otago                                                            |
| GCA_000245415 | Cluster_25 | <i>Pseudomonas syringae</i> pv. <i>actinidiae</i> CFBP 7286         | 58.5 | Scaffold        | University of Exeter                                                           |
| GCA_000344435 | Cluster_25 | <i>Pseudomonas syringae</i> pv. <i>actinidiae</i> TP1               | 58.5 | Contig          | University of Otago                                                            |
| GCA_000145745 | Cluster_25 | <i>Pseudomonas syringae</i> pv. <i>morsprunorum</i> str. M302280PT  | 58.6 | Scaffold        | University of North Carolina at Chapel Hill                                    |
| GCA_000658965 | Cluster_25 | <i>Pseudomonas syringae</i> pv. <i>actinidiae</i> ICMP 9617         | 58.0 | Chromosome      | The New Zealand Institute for Plant & Food Research Limited                    |
| GCA_000416505 | Cluster_25 | <i>Pseudomonas syringae</i> pv. <i>actinidiae</i> ICMP 19073        | 58.8 | Contig          | The New Zealand Institute for Plant & Food Research Limited                    |
| GCA_000007805 | Cluster_25 | <i>Pseudomonas syringae</i> pv. <i>tomato</i> str. DC3000           | 58.3 | Complete Genome | TIGR                                                                           |
| GCA_000416545 | Cluster_25 | <i>Pseudomonas syringae</i> pv. <i>actinidiae</i> ICMP 19098        | 58.7 | Contig          | The New Zealand Institute for Plant & Food Research Limited                    |
| GCA_000416945 | Cluster_25 | <i>Pseudomonas syringae</i> pv. <i>actinidiae</i> ICMP 18801        | 58.6 | Contig          | The New Zealand Institute for Plant & Food Research Limited                    |
| GCA_000452905 | Cluster_25 | <i>Pseudomonas syringae</i> CC1544                                  | 59.1 | Contig          | University of Arizona                                                          |
| GCA_000416605 | Cluster_25 | <i>Pseudomonas syringae</i> pv. <i>actinidiae</i> ICMP 19079        | 58.1 | Contig          | The New Zealand Institute for Plant & Food Research Limited                    |
| GCA_000172895 | Cluster_25 | <i>Pseudomonas syringae</i> pv. <i>tomato</i> T1                    | 58.6 | Contig          | The Sainsbury Laboratory                                                       |
| GCA_000344395 | Cluster_25 | <i>Pseudomonas syringae</i> pv. <i>actinidiae</i> ICMP 18804        | 58.7 | Contig          | University of Otago                                                            |
| GCA_000452625 | Cluster_25 | <i>Pseudomonas syringae</i> CC1630                                  | 58.5 | Contig          | University of Arizona                                                          |
| GCA_000416865 | Cluster_25 | <i>Pseudomonas syringae</i> pv. <i>actinidiae</i> ICMP 19104        | 58.8 | Contig          | The New Zealand Institute for Plant & Food Research Limited                    |
| GCA_000416845 | Cluster_25 | <i>Pseudomonas syringae</i> pv. <i>actinidiae</i> ICMP 19102        | 58.8 | Contig          | The New Zealand Institute for Plant & Food Research Limited                    |
| GCA_000233815 | Cluster_25 | <i>Pseudomonas syringae</i> pv. <i>actinidiae</i> str. CRAFRU8.43   | 58.5 | Contig          | UniversitVt di Udine                                                           |
| GCA_000416765 | Cluster_25 | <i>Pseudomonas syringae</i> pv. <i>actinidiae</i> ICMP 19095        | 58.7 | Contig          | The New Zealand Institute for Plant & Food Research Limited                    |
| GCA_000444135 | Cluster_25 | <i>Pseudomonas avellanae</i> BPIC 631 1                             | 58.5 | Contig          | CRA                                                                            |
| GCA_000416725 | Cluster_25 | <i>Pseudomonas syringae</i> pv. <i>actinidiae</i> ICMP 19097        | 58.6 | Contig          | The New Zealand Institute for Plant & Food Research Limited                    |
| GCA_000177495 | Cluster_25 | <i>Pseudomonas syringae</i> pv. <i>tomato</i> NCPPB 1108            | 58.7 | Contig          | Virginia Tech                                                                  |
| GCA_000409185 | Cluster_25 | <i>Pseudomonas syringae</i>                                         | 57.2 | Scaffold        | University of Exeter                                                           |
| GCA_000452845 | Cluster_25 | <i>Pseudomonas syringae</i> CC1416                                  | 59.0 | Contig          | University of Arizona                                                          |
| GCA_000245395 | Cluster_25 | <i>Pseudomonas syringae</i> pv. <i>theae</i> NCPPB 2598 1           | 58.5 | Scaffold        | University of Exeter                                                           |
| GCA_000177455 | Cluster_25 | <i>Pseudomonas syringae</i> pv. <i>tomato</i> K40                   | 58.6 | Contig          | Virginia Tech                                                                  |
| GCA_000416925 | Cluster_25 | <i>Pseudomonas syringae</i> pv. <i>actinidiae</i> ICMP 18886        | 58.4 | Contig          | Plant & Food Research                                                          |
| GCA_000233835 | Cluster_25 | <i>Pseudomonas syringae</i> pv. <i>actinidiae</i> str. NCPPB 3739   | 58.8 | Contig          | UniversitVt di Udine                                                           |
| GCA_000416625 | Cluster_25 | <i>Pseudomonas syringae</i> pv. <i>actinidiae</i> ICMP 18807 1      | 58.2 | Contig          | The New Zealand Institute for Plant & Food Research Limited                    |
| GCA_000416525 | Cluster_25 | <i>Pseudomonas syringae</i> pv. <i>actinidiae</i> ICMP 19103        | 58.8 | Contig          | The New Zealand Institute for Plant & Food Research Limited                    |
| GCA_000416645 | Cluster_25 | <i>Pseudomonas syringae</i> pv. <i>actinidiae</i> ICMP 19096        | 58.4 | Contig          | The New Zealand Institute for Plant & Food Research Limited                    |
| GCA_000342185 | Cluster_25 | <i>Pseudomonas syringae</i> pv. <i>actinidiae</i> ICMP 18744        | 58.5 | Contig          | University of Otago                                                            |
| GCA_000416885 | Cluster_25 | <i>Pseudomonas syringae</i> pv. <i>actinidiae</i> ICMP 19072        | 58.8 | Contig          | Plant & Food Research                                                          |
| GCA_000344475 | Cluster_25 | <i>Pseudomonas syringae</i> pv. <i>actinidiae</i> str. Shaanxi_M228 | 58.4 | Contig          | University of Otago                                                            |
| GCA_000302915 | Cluster_25 | <i>Pseudomonas avellanae</i> BPIC 631                               | 58.7 | Scaffold        | University of Toronto Centre for the Analysis of Genome Evolution and Function |
| GCA_000416745 | Cluster_25 | <i>Pseudomonas syringae</i> pv. <i>actinidiae</i> ICMP 19094        | 58.7 | Contig          | The New Zealand Institute for Plant & Food Research Limited                    |
| GCA_000177475 | Cluster_25 | <i>Pseudomonas syringae</i> pv. <i>tomato</i> Max13                 | 58.7 | Contig          | Virginia Tech                                                                  |
| GCA_000452545 | Cluster_25 | <i>Pseudomonas syringae</i> USA007                                  | 58.9 | Contig          | University of Arizona                                                          |
| GCA_000444115 | Cluster_25 | <i>Pseudomonas syringae</i> pv. <i>theae</i> NCPPB 2598             | 58.6 | Contig          | CRA                                                                            |
| GCA_000416805 | Cluster_25 | <i>Pseudomonas syringae</i> pv. <i>actinidiae</i> ICMP 19099        | 58.7 | Contig          | The New Zealand Institute for Plant & Food Research Limited                    |
| GCA_000245455 | Cluster_25 | <i>Pseudomonas syringae</i> pv. <i>actinidiae</i> PA459             | 58.4 | Scaffold        | University of Exeter                                                           |
| GCA_000452685 | Cluster_25 | <i>Pseudomonas syringae</i> CC1559                                  | 58.9 | Contig          | University of Arizona                                                          |
| GCA_000344375 | Cluster_25 | <i>Pseudomonas syringae</i> pv. <i>actinidiae</i> ICMP 18800        | 58.5 | Contig          | University of Otago                                                            |
| GCA_000344355 | Cluster_25 | <i>Pseudomonas syringae</i> pv. <i>actinidiae</i> ICMP 18708        | 58.5 | Contig          | University of Otago                                                            |
| GCA_000416485 | Cluster_25 | <i>Pseudomonas syringae</i> pv. <i>actinidiae</i> ICMP 19071        | 58.8 | Contig          | The New Zealand Institute for Plant & Food Research Limited                    |

|               |            |                                                                   |      |                 |                                                                                 |
|---------------|------------|-------------------------------------------------------------------|------|-----------------|---------------------------------------------------------------------------------|
| GCA_000344455 | Cluster_25 | <i>Pseudomonas syringae</i> pv. <i>actinidiae</i> TP6-1           | 58.5 | Contig          | University of Otago                                                             |
| GCA_000344555 | Cluster_25 | <i>Pseudomonas syringae</i> pv. <i>actinidiae</i> ICMP 19439      | 58.5 | Contig          | University of Otago                                                             |
| GCA_000416665 | Cluster_25 | <i>Pseudomonas syringae</i> pv. <i>actinidiae</i> ICMP 9855       | 58.8 | Contig          | The New Zealand Institute for Plant & Food Research Limited                     |
| GCA_000344495 | Cluster_25 | <i>Pseudomonas syringae</i> pv. <i>actinidiae</i> str. Shaanxi_M7 | 58.4 | Contig          | University of Otago                                                             |
| GCA_000233795 | Cluster_25 | <i>Pseudomonas syringae</i> pv. <i>actinidiae</i> str. NCPPB 3871 | 58.8 | Contig          | Universitv† di Udine                                                            |
| GCA_000648735 | Cluster_25 | <i>Pseudomonas syringae</i> pv. <i>actinidiae</i> ICMP 18884      | 58.3 | Chromosome      | The New Zealand Institute for Plant & Food Research                             |
| GCA_000416825 | Cluster_25 | <i>Pseudomonas syringae</i> pv. <i>actinidiae</i> ICMP 19100      | 58.7 | Contig          | The New Zealand Institute for Plant & Food Research Limited                     |
| GCA_000441975 | Cluster_25 | <i>Pseudomonas avellanae</i> CRAFRUec1                            | 58.9 | Contig          | CRA                                                                             |
| GCA_000416705 | Cluster_25 | <i>Pseudomonas syringae</i> pv. <i>actinidiae</i> ICMP 19068      | 58.7 | Contig          | The New Zealand Institute for Plant & Food Research Limited                     |
| GCA_000416685 | Cluster_25 | <i>Pseudomonas syringae</i> pv. <i>actinidiae</i> ICMP 19070      | 58.6 | Contig          | The New Zealand Institute for Plant & Food Research Limited                     |
| GCA_000145865 | Cluster_25 | <i>Pseudomonas syringae</i> pv. <i>actinidiae</i> str. M303091    | 58.8 | Scaffold        | University of North Carolina at Chapel Hill                                     |
| GCA_000245435 | Cluster_25 | <i>Pseudomonas syringae</i> pv. <i>actinidiae</i> KW41            | 58.8 | Scaffold        | University of Exeter                                                            |
| GCA_000452705 | Cluster_26 | <i>Pseudomonas syringae</i> CC1557                                | 58.6 | Complete Genome | University of Arizona                                                           |
| GCA_000452785 | Cluster_26 | <i>Pseudomonas syringae</i> CC1466                                | 58.5 | Contig          | University of Arizona                                                           |
| GCA_000452665 | Cluster_26 | <i>Pseudomonas syringae</i> CC1583                                | 59.0 | Contig          | University of Arizona                                                           |
| GCA_000452645 | Cluster_27 | <i>Pseudomonas syringae</i> CC1629                                | 57.7 | Contig          | University of Arizona                                                           |
| GCA_000452765 | Cluster_27 | <i>Pseudomonas syringae</i> CC1513                                | 57.9 | Contig          | University of Arizona                                                           |
| GCA_000773135 | Cluster_27 | <i>Pseudomonas coronafaciens</i>                                  | 57.7 | Contig          | Chungbuk National University                                                    |
| GCA_000156995 | Cluster_27 | <i>Pseudomonas syringae</i> pv. <i>oryzae</i> str. 1_6            | 57.9 | Scaffold        | University of North Carolina at Chapel Hill                                     |
| GCA_000452505 | Cluster_28 | <i>Pseudomonas viridiflava</i> CC1582                             | 59.3 | Scaffold        | University of Arizona                                                           |
| GCA_000307715 | Cluster_28 | <i>Pseudomonas viridiflava</i> UASWS0038                          | 59.3 | Contig          | University of Applied Science of Western Switzerland//Geneva                    |
| GCA_000452485 | Cluster_28 | <i>Pseudomonas viridiflava</i> TA043                              | 59.3 | Scaffold        | University of Arizona                                                           |
| GCA_000452745 | Cluster_29 | <i>Pseudomonas syringae</i> CC1524                                | 59.1 | Contig          | University of Arizona                                                           |
| GCA_000452825 | Cluster_29 | <i>Pseudomonas syringae</i> CC1417                                | 59.3 | Contig          | University of Arizona                                                           |
| GCA_000737235 | Cluster_30 | <i>Pseudomonas syringae</i> 2                                     | 58.4 | Contig          | University of Arizona                                                           |
| GCA_000416235 | Cluster_30 | <i>Pseudomonas</i> sp. CFI164                                     | 58.9 | Contig          | Boise State University                                                          |
| GCA_000708715 | Cluster_31 | <i>Pseudomonas putida</i> W15Oct28                                | 62.7 | Contig          | Vrije Universiteit Brussel                                                      |
| GCA_000498395 | Cluster_31 | <i>Pseudomonas putida</i> S13.1.2                                 | 62.3 | Contig          | UNIVERSITY OF MALAYA                                                            |
| GCA_000410575 | Cluster_31 | <i>Pseudomonas putida</i> H8234                                   | 61.6 | Complete Genome | Universidad de Huelva                                                           |
| GCA_000412675 | Cluster_31 | <i>Pseudomonas putida</i> NBRC 14164                              | 62.3 | Complete Genome | National Institute of Technology and Evaluation                                 |
| GCA_000292285 | Cluster_31 | <i>Pseudomonas</i> sp. S13.1.2                                    | 62.0 | Contig          | University of Malaya                                                            |
| GCA_000507325 | Cluster_31 | <i>Pseudomonas putida</i> OUS82                                   | 61.8 | Contig          | SCELSSE                                                                         |
| GCA_000478865 | Cluster_31 | <i>Pseudomonas putida</i> SJ3                                     | 61.7 | Contig          | Kyungpook national university                                                   |
| GCA_000514295 | Cluster_32 | <i>Pseudomonas</i> sp. LAIL14HWK12:l6                             | 62.1 | Scaffold        | DOE Joint Genome Institute                                                      |
| GCA_000514315 | Cluster_32 | <i>Pseudomonas</i> sp. LAIL14HWK12:l9                             | 62.1 | Scaffold        | DOE Joint Genome Institute                                                      |
| GCA_000621245 | Cluster_32 | <i>Pseudomonas monteilii</i> NBRC 103158 = DSM 14164              | 61.5 | Scaffold        | DOE Joint Genome Institute                                                      |
| GCA_000483105 | Cluster_32 | <i>Pseudomonas</i> sp. URIL14HWK12:l4                             | 62.0 | Scaffold        | DOE Joint Genome Institute                                                      |
| GCA_000514355 | Cluster_32 | <i>Pseudomonas</i> sp. LAMO17WK12:l4                              | 62.2 | Scaffold        | DOE Joint Genome Institute                                                      |
| GCA_000514335 | Cluster_32 | <i>Pseudomonas</i> sp. LAIL14HWK12:l12                            | 62.2 | Scaffold        | DOE Joint Genome Institute                                                      |
| GCA_000285395 | Cluster_32 | <i>Pseudomonas putida</i> B001                                    | 62.1 | Contig          | Chonnam National University                                                     |
| GCA_000730605 | Cluster_32 | <i>Pseudomonas monteilii</i> NBRC 103158 = DSM 14164 1            | 61.5 | Contig          | National Institute of Technology and Evaluation                                 |
| GCA_000262005 | Cluster_32 | <i>Pseudomonas monteilii</i> QM                                   | 61.8 | Contig          | School of Environmental Science and Technology, Dalian University of Technology |
| GCA_000527055 | Cluster_32 | <i>Pseudomonas</i> sp. LAIL14HWK12:l5                             | 62.1 | Contig          | DOE Joint Genome Institute                                                      |
| GCA_000495455 | Cluster_33 | <i>Pseudomonas putida</i> S12 1                                   | 61.1 | Contig          | RWTH Aachen University                                                          |
| GCA_000633915 | Cluster_33 | <i>Pseudomonas monteilii</i>                                      | 61.4 | Scaffold        | 85303                                                                           |
| GCA_000264665 | Cluster_33 | <i>Pseudomonas putida</i> ND6                                     | 61.7 | Complete Genome | Department of Microbiology of Nankai University                                 |
| GCA_000183645 | Cluster_33 | <i>Pseudomonas putida</i> BIRD-1                                  | 61.7 | Complete Genome | Estacion Experimental del Zaidin, CSIC                                          |
| GCA_000787655 | Cluster_33 | <i>Pseudomonas putida</i> 3                                       | 61.9 | Contig          | National Institute of Technology and Evaluation                                 |
| GCA_000226475 | Cluster_33 | <i>Pseudomonas putida</i> str. Idaho                              | 61.6 | Contig          | Shanghai Jiao Tong University                                                   |

|               |            |                                                              |      |                 |                                                                                                                           |
|---------------|------------|--------------------------------------------------------------|------|-----------------|---------------------------------------------------------------------------------------------------------------------------|
| GCA_000281215 | Cluster_33 | <i>Pseudomonas putida</i> DOT-T1E                            | 61.4 | Complete Genome | EEZ-CSIC                                                                                                                  |
| GCA_000016865 | Cluster_33 | <i>Pseudomonas putida</i> F1                                 | 61.9 | Complete Genome | US DOE Joint Genome Institute                                                                                             |
| GCA_000271965 | Cluster_33 | <i>Pseudomonas putida</i> SJTE-1                             | 62.3 | Contig          | Shanghai Jiao Tong University                                                                                             |
| GCA_000390005 | Cluster_33 | <i>Pseudomonas putida</i> LF54                               | 61.3 | Contig          | University of Tsukuba                                                                                                     |
| GCA_000007565 | Cluster_33 | <i>Pseudomonas putida</i> KT2440                             | 61.5 | Complete Genome | TIGR                                                                                                                      |
| GCA_000799625 | Cluster_33 | <i>Pseudomonas putida</i> 2                                  | 61.8 | Scaffold        | DOE Joint Genome Institute                                                                                                |
| GCA_000294445 | Cluster_33 | <i>Pseudomonas putida</i> LS46                               | 61.7 | Contig          | University of Manitoba,                                                                                                   |
| GCA_000367825 | Cluster_33 | <i>Pseudomonas putida</i> TRO1                               | 61.4 | Contig          | Aalborg University                                                                                                        |
| GCA_000226035 | Cluster_33 | <i>Pseudomonas putida</i> B6-2                               | 61.6 | Contig          | State Key Laboratory of Microbial Metabolism and School of Life Sciences and Biotechnology, Shanghai Jiao Tong University |
| GCA_000287915 | Cluster_33 | <i>Pseudomonas putida</i> S12                                | 61.5 | Contig          | Shanghai Jiao Tong University                                                                                             |
| GCA_000510325 | Cluster_34 | <i>Pseudomonas monteilii</i> SB3101                          | 62.5 | Complete Genome | Aalborg University                                                                                                        |
| GCA_000325725 | Cluster_34 | <i>Pseudomonas putida</i> HB3267                             | 62.6 | Complete Genome | Universidad de Huelva                                                                                                     |
| GCA_000219705 | Cluster_34 | <i>Pseudomonas putida</i> S16                                | 62.3 | Complete Genome | Shanghai Jiao Tong University                                                                                             |
| GCA_000691565 | Cluster_34 | <i>Pseudomonas putida</i>                                    | 62.5 | Complete Genome | Nanjing Agricultural University                                                                                           |
| GCA_000511325 | Cluster_34 | <i>Pseudomonas</i> sp. FGI182                                | 63.3 | Complete Genome | DOE Joint Genome Institute                                                                                                |
| GCA_000764405 | Cluster_34 | <i>Pseudomonas plecoglossicida</i>                           | 62.1 | Contig          | Yeungnam University                                                                                                       |
| GCA_000510285 | Cluster_34 | <i>Pseudomonas monteilii</i> SB3078                          | 62.5 | Complete Genome | Aalborg University                                                                                                        |
| GCA_000500605 | Cluster_34 | <i>Pseudomonas taiwanensis</i> SJ9                           | 61.8 | Contig          | Kyungpook national university                                                                                             |
| GCA_000710785 | Cluster_35 | <i>Pseudomonas putida</i> T2-2                               | 62.6 | Contig          | University of Malaya                                                                                                      |
| GCA_000190455 | Cluster_35 | <i>Pseudomonas</i> sp. TJI-51                                | 62.1 | Contig          | ICCBS                                                                                                                     |
| GCA_000763225 | Cluster_36 | <i>Pseudomonas</i> sp. H2                                    | 62.6 | Contig          | University of Idaho                                                                                                       |
| GCA_000731675 | Cluster_36 | <i>Pseudomonas</i> sp. WCS358                                | 62.7 | Contig          | Utrecht University, Utrecht, NETHERLANDS                                                                                  |
| GCA_000412715 | Cluster_37 | <i>Pseudomonas putida</i> NB2011                             | 62.8 | Scaffold        | Zhejiang Wanli University                                                                                                 |
| GCA_000730665 | Cluster_37 | <i>Pseudomonas plecoglossicida</i> NBRC 103162 = DSM 15088 1 | 63.0 | Contig          | National Institute of Technology and Evaluation                                                                           |
| GCA_000688275 | Cluster_37 | <i>Pseudomonas plecoglossicida</i> NBRC 103162 = DSM 15088   | 63.0 | Contig          | DOE Joint Genome Institute                                                                                                |
| GCA_000494915 | Cluster_38 | <i>Pseudomonas</i> sp. VLB120                                | 61.5 | Complete Genome | Bielefeld University                                                                                                      |
| GCA_000425785 | Cluster_38 | <i>Pseudomonas taiwanensis</i> DSM 21245                     | 61.9 | Scaffold        | DOE Joint Genome Institute                                                                                                |
| GCA_000514235 | Cluster_39 | <i>Pseudomonas</i> sp. URMO17WK12:111                        | 61.9 | Scaffold        | DOE Joint Genome Institute                                                                                                |
| GCA_000730565 | Cluster_39 | <i>Pseudomonas fulva</i> NBRC 16637 = DSM 17717 1            | 61.8 | Contig          | National Institute of Technology and Evaluation                                                                           |
| GCA_000621265 | Cluster_39 | <i>Pseudomonas fulva</i> NBRC 16637 = DSM 17717              | 61.7 | Scaffold        | DOE Joint Genome Institute                                                                                                |
| GCA_000730545 | Cluster_39 | <i>Pseudomonas cremoricolorata</i> NBRC 16634                | 61.7 | Contig          | National Institute of Technology and Evaluation                                                                           |
| GCA_000425765 | Cluster_40 | <i>Pseudomonas parafulva</i> DSM 17004                       | 62.5 | Scaffold        | DOE Joint Genome Institute                                                                                                |
| GCA_000730645 | Cluster_40 | <i>Pseudomonas parafulva</i> NBRC 16636                      | 62.5 | Contig          | National Institute of Technology and Evaluation                                                                           |
| GCA_000800255 | Cluster_41 | <i>Pseudomonas parafulva</i>                                 | 63.5 | Complete Genome | China National Rice Research Institute                                                                                    |
| GCA_000467045 | Cluster_41 | <i>Pseudomonas</i> sp. ICMP 17674                            | 63.4 | Contig          | Charles Sturt University                                                                                                  |
| GCA_000696345 | Cluster_42 | <i>Pseudomonas</i> sp. P482                                  | 62.4 | Contig          | Intercollegiate Faculty of Biotechnology UG&MUG                                                                           |
| GCA_000259195 | Cluster_42 | <i>Pseudomonas</i> sp. HYS                                   | 62.4 | Scaffold        | College of Life Sciences, Wuhan University                                                                                |
| GCA_000733715 | Cluster_43 | <i>Pseudomonas mendocina</i> S5.2                            | 62.4 | Contig          | University of Malaya                                                                                                      |
| GCA_000204295 | Cluster_43 | <i>Pseudomonas mendocina</i> NK-01                           | 62.5 | Complete Genome | Department of Microbiology, College of Life Sciences, Nankai University,Tianjin 300071, China                             |
| GCA_000725105 | Cluster_43 | <i>Pseudomonas mendocina</i>                                 | 62.4 | Contig          | University of Malaya                                                                                                      |
| GCA_000319815 | Cluster_44 | <i>Pseudomonas alcaliphila</i> 34                            | 62.6 | Contig          | University of Florence                                                                                                    |
| GCA_000465575 | Cluster_44 | <i>Pseudomonas mendocina</i> EGD-AQ5                         | 62.7 | Contig          | National Environmental Engineering Research Institute-CSIR                                                                |
| GCA_000016565 | Cluster_45 | <i>Pseudomonas mendocina</i> ymp                             | 64.7 | Complete Genome | US DOE Joint Genome Institute                                                                                             |
| GCA_000287395 | Cluster_45 | <i>Pseudomonas mendocina</i> DLHK                            | 64.7 | Contig          | The University of Hong Kong                                                                                               |
| GCA_000732445 | Cluster_46 | <i>Pseudomonas oleovorans</i>                                | 64.9 | Contig          | 85303                                                                                                                     |
| GCA_000798915 | Cluster_46 | <i>Pseudomonas mendocina</i> ZWU0006                         | 64.8 | Contig          | University of Oregon                                                                                                      |
| GCA_000514255 | Cluster_47 | <i>Pseudomonas</i> sp. URMO17WK12:13                         | 63.6 | Scaffold        | DOE Joint Genome Institute                                                                                                |
| GCA_000514215 | Cluster_47 | <i>Pseudomonas</i> sp. URMO17WK12:14                         | 63.4 | Scaffold        | DOE Joint Genome Institute                                                                                                |
| GCA_000213805 | Cluster_47 | <i>Pseudomonas fulva</i> 12-X                                | 63.5 | Complete Genome | US DOE Joint Genome Institute                                                                                             |

|               |            |                                            |      |                      |                                                                                                                           |
|---------------|------------|--------------------------------------------|------|----------------------|---------------------------------------------------------------------------------------------------------------------------|
| GCA_000495915 | Cluster_48 | <i>Pseudomonas chloritidis</i> mutans AW-1 | 62.5 | Contig               | Laboratory of Systems and Synthetic Biology                                                                               |
| GCA_000267545 | Cluster_48 | <i>Pseudomonas stutzeri</i> CCUG 29243     | 62.7 | Complete Genome      | MICROGEN: Microbial Comparative Genomics                                                                                  |
| GCA_000341615 | Cluster_48 | <i>Pseudomonas stutzeri</i> NF13           | 63.0 | Contig               | University of Balearic Islands                                                                                            |
| GCA_000416345 | Cluster_49 | <i>Pseudomonas stutzeri</i> B15MN1         | 63.4 | Contig               | University of Balearic Islands                                                                                            |
| GCA_000280555 | Cluster_49 | <i>Pseudomonas stutzeri</i> XLDN-R         | 63.9 | Contig               | State Key Laboratory of Microbial Metabolism and School of Life Sciences and Biotechnology, Shanghai Jiao Tong University |
| GCA_000195105 | Cluster_49 | <i>Pseudomonas stutzeri</i> DSM 4166       | 64.0 | Complete Genome      | Biotechnology Research Institute, Chinese Academy of Agricultural Sciences, Key Laboratory of Crop Biotechnology.         |
| GCA_000282955 | Cluster_49 | <i>Pseudomonas stutzeri</i> T13            | 63.9 | Contig               | Harbin Institute of Technology                                                                                            |
| GCA_000474255 | Cluster_50 | <i>Pseudomonas alcaligenes</i> MR13-0052   | 65.8 | Contig               | National Institute of Infectious Diseases, Japan                                                                          |
| GCA_000455385 | Cluster_50 | <i>Pseudomonas alcaligenes</i> OT 69       | 66.0 | Contig               | University of Illinois at Chicago                                                                                         |
| GCA_000733615 | Cluster_51 | <i>Pseudomonas nitroreducens</i>           | 64.2 | Contig               | Georgia Institute of Technology                                                                                           |
| GCA_000733635 | Cluster_51 | <i>Pseudomonas nitroreducens</i> 1         | 64.2 | Contig               | Georgia Institute of Technology                                                                                           |
| GCA_000518065 | Cluster_51 | <i>Pseudomonas nitroreducens</i> HBP1      | 64.2 | Contig               | CIB-CSIC                                                                                                                  |
| GCA_000317185 | Cluster_52 | <i>Pseudomonas</i> sp. M1                  | 67.2 | Contig               | University of Minho                                                                                                       |
| GCA_000725445 | Cluster_52 | <i>Pseudomonas</i> sp. AAC                 | 67.0 | Scaffold             | CSIRO                                                                                                                     |
| GCA_000792945 | Cluster_53 | <i>Pseudomonas aeruginosa</i> 188          | 66.4 | Contig               | AstraZeneca                                                                                                               |
| GCA_000795735 | Cluster_53 | <i>Pseudomonas aeruginosa</i> 322          | 66.0 | Contig               | AstraZeneca                                                                                                               |
| GCA_000795025 | Cluster_53 | <i>Pseudomonas aeruginosa</i> 286          | 66.4 | Contig               | AstraZeneca                                                                                                               |
| GCA_000791445 | Cluster_53 | <i>Pseudomonas aeruginosa</i> 111          | 66.3 | Contig               | AstraZeneca                                                                                                               |
| GCA_000520355 | Cluster_53 | <i>Pseudomonas aeruginosa</i> BWHPA042     | 66.5 | Scaffold             | Broad Institute                                                                                                           |
| GCA_000478485 | Cluster_53 | <i>Pseudomonas</i> sp. P179                | 65.8 | Scaffold             | Broad Institute                                                                                                           |
| GCA_000786565 | Cluster_53 | <i>Pseudomonas aeruginosa</i> 10           | 66.2 | Contig               | University of Huddersfield                                                                                                |
| GCA_000484495 | Cluster_53 | <i>Pseudomonas aeruginosa</i> PAO1-VE2     | 66.6 | Chromosome with gaps | Marshall University School of Medicine                                                                                    |
| GCA_000792545 | Cluster_53 | <i>Pseudomonas aeruginosa</i> 168          | 66.1 | Contig               | AstraZeneca                                                                                                               |
| GCA_000506345 | Cluster_53 | <i>Pseudomonas aeruginosa</i> JD333        | 66.5 | Contig               | University of Ottawa                                                                                                      |
| GCA_000796505 | Cluster_53 | <i>Pseudomonas aeruginosa</i> 369          | 66.5 | Contig               | AstraZeneca                                                                                                               |
| GCA_000795345 | Cluster_53 | <i>Pseudomonas aeruginosa</i> 302          | 65.9 | Contig               | AstraZeneca                                                                                                               |
| GCA_000793665 | Cluster_53 | <i>Pseudomonas aeruginosa</i> 221          | 66.5 | Contig               | AstraZeneca                                                                                                               |
| GCA_000792965 | Cluster_53 | <i>Pseudomonas aeruginosa</i> 189          | 65.9 | Contig               | AstraZeneca                                                                                                               |
| GCA_000790465 | Cluster_53 | <i>Pseudomonas aeruginosa</i> 151          | 66.3 | Contig               | AstraZeneca                                                                                                               |
| GCA_000789835 | Cluster_53 | <i>Pseudomonas aeruginosa</i> 31           | 66.3 | Contig               | AstraZeneca                                                                                                               |
| GCA_000506185 | Cluster_53 | <i>Pseudomonas aeruginosa</i> JD322        | 66.4 | Contig               | University of Ottawa                                                                                                      |
| GCA_000247435 | Cluster_53 | <i>Pseudomonas aeruginosa</i> MPAO1/P1     | 66.5 | Contig               | Argonne National Laboratory                                                                                               |
| GCA_000223965 | Cluster_53 | <i>Pseudomonas aeruginosa</i> 213BR        | 66.1 | Complete Genome      | IBIS, Universite Laval                                                                                                    |
| GCA_000789815 | Cluster_53 | <i>Pseudomonas aeruginosa</i> 30           | 66.4 | Contig               | AstraZeneca                                                                                                               |
| GCA_000796425 | Cluster_53 | <i>Pseudomonas aeruginosa</i> 365          | 66.3 | Contig               | AstraZeneca                                                                                                               |
| GCA_000789725 | Cluster_53 | <i>Pseudomonas aeruginosa</i> 25           | 66.0 | Contig               | AstraZeneca                                                                                                               |
| GCA_000481725 | Cluster_53 | <i>Pseudomonas aeruginosa</i> S35004       | 66.1 | Scaffold             | Broad Institute                                                                                                           |
| GCA_000791855 | Cluster_53 | <i>Pseudomonas aeruginosa</i> 132          | 66.0 | Contig               | AstraZeneca                                                                                                               |
| GCA_000790485 | Cluster_53 | <i>Pseudomonas aeruginosa</i> 63           | 66.4 | Contig               | AstraZeneca                                                                                                               |
| GCA_000793365 | Cluster_53 | <i>Pseudomonas aeruginosa</i> 209          | 66.5 | Contig               | AstraZeneca                                                                                                               |
| GCA_000481305 | Cluster_53 | <i>Pseudomonas aeruginosa</i> BWHPA020     | 66.3 | Scaffold             | Broad Institute                                                                                                           |
| GCA_000790735 | Cluster_53 | <i>Pseudomonas aeruginosa</i> 76           | 66.0 | Contig               | AstraZeneca                                                                                                               |
| GCA_000795985 | Cluster_53 | <i>Pseudomonas aeruginosa</i> 343          | 66.0 | Contig               | AstraZeneca                                                                                                               |
| GCA_000629185 | Cluster_53 | <i>Pseudomonas aeruginosa</i> 3580         | 66.0 | Scaffold             | Broad Institute                                                                                                           |
| GCA_000481585 | Cluster_53 | <i>Pseudomonas aeruginosa</i> BWHPA006     | 66.2 | Scaffold             | Broad Institute                                                                                                           |
| GCA_000796345 | Cluster_53 | <i>Pseudomonas aeruginosa</i> 361          | 65.8 | Contig               | AstraZeneca                                                                                                               |
| GCA_000795145 | Cluster_53 | <i>Pseudomonas aeruginosa</i> 292          | 66.1 | Contig               | AstraZeneca                                                                                                               |
| GCA_000412355 | Cluster_53 | <i>Pseudomonas aeruginosa</i> str. C 763   | 66.0 | Contig               | University of Strathclyde                                                                                                 |
| GCA_000791025 | Cluster_53 | <i>Pseudomonas aeruginosa</i> 90           | 66.3 | Contig               | AstraZeneca                                                                                                               |

|               |            |                                  |      |                      |                                         |
|---------------|------------|----------------------------------|------|----------------------|-----------------------------------------|
| GCA_000757505 | Cluster_53 | Pseudomonas sp. YS-1p            | 66.5 | Contig               | Oklahoma State University               |
| GCA_000629465 | Cluster_53 | Pseudomonas aeruginosa BWH056    | 66.0 | Scaffold             | Broad Institute                         |
| GCA_000792745 | Cluster_53 | Pseudomonas aeruginosa 178       | 66.4 | Contig               | AstraZeneca                             |
| GCA_000793745 | Cluster_53 | Pseudomonas aeruginosa 225       | 66.1 | Contig               | AstraZeneca                             |
| GCA_000481845 | Cluster_53 | Pseudomonas aeruginosa UDL       | 66.5 | Scaffold             | Broad Institute                         |
| GCA_000480435 | Cluster_53 | Pseudomonas aeruginosa C48       | 66.4 | Scaffold             | Broad Institute                         |
| GCA_000796365 | Cluster_53 | Pseudomonas aeruginosa 362       | 65.9 | Contig               | AstraZeneca                             |
| GCA_000793135 | Cluster_53 | Pseudomonas aeruginosa 198       | 65.7 | Contig               | AstraZeneca                             |
| GCA_000789545 | Cluster_53 | Pseudomonas aeruginosa 17        | 66.5 | Contig               | AstraZeneca                             |
| GCA_000795705 | Cluster_53 | Pseudomonas aeruginosa 320       | 66.1 | Contig               | AstraZeneca                             |
| GCA_000789605 | Cluster_53 | Pseudomonas aeruginosa 19        | 66.0 | Contig               | AstraZeneca                             |
| GCA_000792005 | Cluster_53 | Pseudomonas aeruginosa 139       | 66.5 | Contig               | AstraZeneca                             |
| GCA_000790685 | Cluster_53 | Pseudomonas aeruginosa 73        | 66.2 | Contig               | AstraZeneca                             |
| GCA_000481925 | Cluster_53 | Pseudomonas aeruginosa CF18      | 66.3 | Scaffold             | Broad Institute                         |
| GCA_000629145 | Cluster_53 | Pseudomonas aeruginosa BWH029    | 66.4 | Scaffold             | Broad Institute                         |
| GCA_000795565 | Cluster_53 | Pseudomonas aeruginosa 313       | 66.0 | Contig               | AstraZeneca                             |
| GCA_000792365 | Cluster_53 | Pseudomonas aeruginosa 159       | 66.4 | Contig               | AstraZeneca                             |
| GCA_000520195 | Cluster_53 | Pseudomonas aeruginosa PS42      | 65.5 | Scaffold             | Broad Institute                         |
| GCA_000792085 | Cluster_53 | Pseudomonas aeruginosa 143       | 65.8 | Contig               | AstraZeneca                             |
| GCA_000168335 | Cluster_53 | Pseudomonas aeruginosa PACS2     | 66.3 | Complete Genome      | University of Washington                |
| GCA_000791635 | Cluster_53 | Pseudomonas aeruginosa 121       | 66.4 | Contig               | AstraZeneca                             |
| GCA_000796245 | Cluster_53 | Pseudomonas aeruginosa 356       | 66.0 | Contig               | AstraZeneca                             |
| GCA_000794305 | Cluster_53 | Pseudomonas aeruginosa 251       | 66.3 | Contig               | AstraZeneca                             |
| GCA_000795865 | Cluster_53 | Pseudomonas aeruginosa 328       | 65.8 | Contig               | AstraZeneca                             |
| GCA_000481665 | Cluster_53 | Pseudomonas aeruginosa BWHPSA002 | 66.1 | Scaffold             | Broad Institute                         |
| GCA_000792145 | Cluster_53 | Pseudomonas aeruginosa 146       | 66.0 | Contig               | AstraZeneca                             |
| GCA_000629205 | Cluster_53 | Pseudomonas aeruginosa 3579      | 66.2 | Scaffold             | Broad Institute                         |
| GCA_000583975 | Cluster_53 | Pseudomonas aeruginosa LESlike1  | 66.4 | Chromosome with gaps | IBIS, University Laval                  |
| GCA_000794085 | Cluster_53 | Pseudomonas aeruginosa 242       | 65.8 | Contig               | AstraZeneca                             |
| GCA_000790585 | Cluster_53 | Pseudomonas aeruginosa 68        | 66.0 | Contig               | AstraZeneca                             |
| GCA_000763245 | Cluster_53 | Pseudomonas aeruginosa 8         | 66.2 | Contig               | Instituto Oswaldo Cruz                  |
| GCA_000481105 | Cluster_53 | Pseudomonas aeruginosa BL02      | 66.1 | Scaffold             | Broad Institute                         |
| GCA_000794965 | Cluster_53 | Pseudomonas aeruginosa 283       | 66.5 | Contig               | AstraZeneca                             |
| GCA_000790035 | Cluster_53 | Pseudomonas aeruginosa 41        | 66.2 | Contig               | AstraZeneca                             |
| GCA_000791185 | Cluster_53 | Pseudomonas aeruginosa 98        | 66.0 | Contig               | AstraZeneca                             |
| GCA_000793885 | Cluster_53 | Pseudomonas aeruginosa 232       | 65.9 | Contig               | AstraZeneca                             |
| GCA_000480575 | Cluster_53 | Pseudomonas aeruginosa M8A.3     | 66.5 | Scaffold             | Broad Institute                         |
| GCA_000797085 | Cluster_53 | Pseudomonas aeruginosa 398       | 65.6 | Contig               | AstraZeneca                             |
| GCA_000793615 | Cluster_53 | Pseudomonas aeruginosa 219       | 66.2 | Contig               | AstraZeneca                             |
| GCA_000791155 | Cluster_53 | Pseudomonas aeruginosa 97        | 65.9 | Contig               | AstraZeneca                             |
| GCA_000795115 | Cluster_53 | Pseudomonas aeruginosa 291       | 65.9 | Contig               | AstraZeneca                             |
| GCA_000793105 | Cluster_53 | Pseudomonas aeruginosa 196       | 66.6 | Contig               | AstraZeneca                             |
| GCA_000647595 | Cluster_53 | Pseudomonas aeruginosa 152       | 66.1 | Contig               | Universidad Nacional Autonoma de Mexico |
| GCA_000583935 | Cluster_53 | Pseudomonas aeruginosa LES400    | 66.3 | Chromosome with gaps | IBIS, University Laval                  |
| GCA_000520435 | Cluster_53 | Pseudomonas aeruginosa BWHPSA038 | 66.3 | Scaffold             | Broad Institute                         |
| GCA_000795535 | Cluster_53 | Pseudomonas aeruginosa 312       | 66.0 | Contig               | AstraZeneca                             |
| GCA_000258285 | Cluster_53 | Pseudomonas aeruginosa LCT-PA102 | 66.2 | Contig               | BGI                                     |
| GCA_000295475 | Cluster_53 | Pseudomonas aeruginosa CIG1      | 66.0 | Contig               | University of Washington                |
| GCA_000792565 | Cluster_53 | Pseudomonas aeruginosa 169       | 66.3 | Contig               | AstraZeneca                             |



|               |            |                                    |      |                      |                                                 |
|---------------|------------|------------------------------------|------|----------------------|-------------------------------------------------|
| GCA_000412455 | Cluster_53 | Pseudomonas aeruginosa str. PA 17  | 66.5 | Contig               | University of Strathclyde                       |
| GCA_000791265 | Cluster_53 | Pseudomonas aeruginosa 102         | 66.3 | Contig               | AstraZeneca                                     |
| GCA_000760505 | Cluster_53 | Pseudomonas aeruginosa 12          | 65.7 | Contig               | Center for Cellular and Molecular Biology(CCMB) |
| GCA_000480745 | Cluster_53 | Pseudomonas aeruginosa BL20        | 66.2 | Scaffold             | Broad Institute                                 |
| GCA_000797125 | Cluster_53 | Pseudomonas aeruginosa 400         | 66.3 | Contig               | AstraZeneca                                     |
| GCA_000297315 | Cluster_53 | Pseudomonas aeruginosa ATCC 700888 | 66.1 | Contig               | University of Washington                        |
| GCA_000790825 | Cluster_53 | Pseudomonas aeruginosa 80          | 66.0 | Contig               | AstraZeneca                                     |
| GCA_000794025 | Cluster_53 | Pseudomonas aeruginosa 239         | 66.1 | Contig               | AstraZeneca                                     |
| GCA_000506325 | Cluster_53 | Pseudomonas aeruginosa JD332       | 66.6 | Contig               | University of Ottawa                            |
| GCA_000793205 | Cluster_53 | Pseudomonas aeruginosa 201         | 66.4 | Contig               | AstraZeneca                                     |
| GCA_000791685 | Cluster_53 | Pseudomonas aeruginosa 123         | 65.4 | Contig               | AstraZeneca                                     |
| GCA_000291745 | Cluster_53 | Pseudomonas aeruginosa NCMG1179    | 66.0 | Scaffold             | National Center for Global Health and Medicine  |
| GCA_000796865 | Cluster_53 | Pseudomonas aeruginosa 387         | 66.0 | Contig               | AstraZeneca                                     |
| GCA_000795105 | Cluster_53 | Pseudomonas aeruginosa 290         | 66.0 | Contig               | AstraZeneca                                     |
| GCA_000793585 | Cluster_53 | Pseudomonas aeruginosa 217         | 66.4 | Contig               | AstraZeneca                                     |
| GCA_000794445 | Cluster_53 | Pseudomonas aeruginosa 257         | 66.1 | Contig               | AstraZeneca                                     |
| GCA_000791305 | Cluster_53 | Pseudomonas aeruginosa 104         | 65.9 | Contig               | AstraZeneca                                     |
| GCA_000792395 | Cluster_53 | Pseudomonas aeruginosa 161         | 66.1 | Contig               | AstraZeneca                                     |
| GCA_000520275 | Cluster_53 | Pseudomonas aeruginosa BWHPA046    | 66.1 | Scaffold             | Broad Institute                                 |
| GCA_000792155 | Cluster_53 | Pseudomonas aeruginosa 147         | 66.4 | Contig               | AstraZeneca                                     |
| GCA_000796045 | Cluster_53 | Pseudomonas aeruginosa 346         | 66.0 | Contig               | AstraZeneca                                     |
| GCA_000794405 | Cluster_53 | Pseudomonas aeruginosa 255         | 65.8 | Contig               | AstraZeneca                                     |
| GCA_000793395 | Cluster_53 | Pseudomonas aeruginosa 211         | 65.8 | Contig               | AstraZeneca                                     |
| GCA_000284555 | Cluster_53 | Pseudomonas aeruginosa NCGM2.S1    | 66.1 | Complete Genome      | National Center for Global Health and Medicine  |
| GCA_000709285 | Cluster_53 | Pseudomonas aeruginosa 1           | 66.5 | Contig               | University of Delhi                             |
| GCA_000792425 | Cluster_53 | Pseudomonas aeruginosa 162         | 66.4 | Contig               | AstraZeneca                                     |
| GCA_000791525 | Cluster_53 | Pseudomonas aeruginosa 115         | 66.3 | Contig               | AstraZeneca                                     |
| GCA_000796875 | Cluster_53 | Pseudomonas aeruginosa 388         | 66.5 | Contig               | AstraZeneca                                     |
| GCA_000629045 | Cluster_53 | Pseudomonas aeruginosa BWH035      | 66.1 | Scaffold             | Broad Institute                                 |
| GCA_000789485 | Cluster_53 | Pseudomonas aeruginosa 13          | 66.5 | Contig               | AstraZeneca                                     |
| GCA_000506285 | Cluster_53 | Pseudomonas aeruginosa JD334       | 66.2 | Contig               | University of Ottawa                            |
| GCA_000794665 | Cluster_53 | Pseudomonas aeruginosa 268         | 66.1 | Contig               | AstraZeneca                                     |
| GCA_000480475 | Cluster_53 | Pseudomonas aeruginosa C40         | 66.3 | Scaffold             | Broad Institute                                 |
| GCA_000789805 | Cluster_53 | Pseudomonas aeruginosa 29          | 66.4 | Contig               | AstraZeneca                                     |
| GCA_000790645 | Cluster_53 | Pseudomonas aeruginosa 71          | 66.5 | Contig               | AstraZeneca                                     |
| GCA_000481225 | Cluster_53 | Pseudomonas aeruginosa BWHPA024    | 66.1 | Scaffold             | Broad Institute                                 |
| GCA_000520175 | Cluster_53 | Pseudomonas aeruginosa PS50        | 66.0 | Scaffold             | Broad Institute                                 |
| GCA_000791035 | Cluster_53 | Pseudomonas aeruginosa 91          | 66.2 | Contig               | AstraZeneca                                     |
| GCA_000792065 | Cluster_53 | Pseudomonas aeruginosa 142         | 65.8 | Contig               | AstraZeneca                                     |
| GCA_000505885 | Cluster_53 | Pseudomonas aeruginosa JD303       | 66.6 | Contig               | University of Ottawa                            |
| GCA_000794245 | Cluster_53 | Pseudomonas aeruginosa 248         | 66.0 | Contig               | AstraZeneca                                     |
| GCA_000795165 | Cluster_53 | Pseudomonas aeruginosa 293         | 66.5 | Contig               | AstraZeneca                                     |
| GCA_000791495 | Cluster_53 | Pseudomonas aeruginosa 114         | 66.1 | Contig               | AstraZeneca                                     |
| GCA_000583995 | Cluster_53 | Pseudomonas aeruginosa LESlike4    | 66.4 | Chromosome with gaps | IBIS, University Laval                          |
| GCA_000481345 | Cluster_53 | Pseudomonas aeruginosa BWHPA018    | 66.2 | Scaffold             | Broad Institute                                 |
| GCA_000412475 | Cluster_53 | Pseudomonas aeruginosa str. J 1532 | 66.2 | Contig               | University of Strathclyde                       |
| GCA_000791885 | Cluster_53 | Pseudomonas aeruginosa 133         | 66.2 | Contig               | AstraZeneca                                     |
| GCA_000481265 | Cluster_53 | Pseudomonas aeruginosa BWHPA022    | 66.2 | Scaffold             | Broad Institute                                 |
| GCA_000795285 | Cluster_53 | Pseudomonas aeruginosa 299         | 66.1 | Contig               | AstraZeneca                                     |

|               |            |                                 |      |                 |                                                |
|---------------|------------|---------------------------------|------|-----------------|------------------------------------------------|
| GCA_000152545 | Cluster_53 | Pseudomonas aeruginosa 2192     | 66.2 | Scaffold        | Broad Institute                                |
| GCA_000795185 | Cluster_53 | Pseudomonas aeruginosa 294      | 66.4 | Contig          | AstraZeneca                                    |
| GCA_000789525 | Cluster_53 | Pseudomonas aeruginosa 15       | 66.0 | Contig          | AstraZeneca                                    |
| GCA_000520395 | Cluster_53 | Pseudomonas aeruginosa BWHPA040 | 66.4 | Scaffold        | Broad Institute                                |
| GCA_000795065 | Cluster_53 | Pseudomonas aeruginosa 288      | 66.0 | Contig          | AstraZeneca                                    |
| GCA_000615525 | Cluster_53 | Pseudomonas aeruginosa JCM 6119 | 65.8 | Contig          | The University of Tokyo                        |
| GCA_000789635 | Cluster_53 | Pseudomonas aeruginosa 21       | 66.0 | Contig          | AstraZeneca                                    |
| GCA_000792265 | Cluster_53 | Pseudomonas aeruginosa 154      | 65.7 | Contig          | AstraZeneca                                    |
| GCA_000480375 | Cluster_53 | Pseudomonas aeruginosa CF77     | 65.8 | Scaffold        | Broad Institute                                |
| GCA_000524595 | Cluster_53 | Pseudomonas aeruginosa YL84     | 66.4 | Complete Genome | UNIVERSITY OF MALAYA                           |
| GCA_000481245 | Cluster_53 | Pseudomonas aeruginosa BWHPA023 | 66.1 | Scaffold        | Broad Institute                                |
| GCA_000791425 | Cluster_53 | Pseudomonas aeruginosa 110      | 66.1 | Contig          | AstraZeneca                                    |
| GCA_000792705 | Cluster_53 | Pseudomonas aeruginosa 176      | 65.8 | Contig          | AstraZeneca                                    |
| GCA_000795585 | Cluster_53 | Pseudomonas aeruginosa 314      | 65.7 | Contig          | AstraZeneca                                    |
| GCA_000791605 | Cluster_53 | Pseudomonas aeruginosa 119      | 66.2 | Contig          | AstraZeneca                                    |
| GCA_000797005 | Cluster_53 | Pseudomonas aeruginosa 394      | 66.0 | Contig          | AstraZeneca                                    |
| GCA_000791725 | Cluster_53 | Pseudomonas aeruginosa 125      | 65.8 | Contig          | AstraZeneca                                    |
| GCA_000647655 | Cluster_53 | Pseudomonas aeruginosa M10      | 66.9 | Contig          | Universidad Nacional Autonoma de Mexico        |
| GCA_000796145 | Cluster_53 | Pseudomonas aeruginosa 351      | 66.3 | Contig          | AstraZeneca                                    |
| GCA_000789685 | Cluster_53 | Pseudomonas aeruginosa 23       | 66.1 | Contig          | AstraZeneca                                    |
| GCA_000481445 | Cluster_53 | Pseudomonas aeruginosa BWHPA013 | 66.2 | Scaffold        | Broad Institute                                |
| GCA_000496455 | Cluster_53 | Pseudomonas aeruginosa DHS01    | 65.8 | Contig          | Hospital of Besancon - France                  |
| GCA_000629365 | Cluster_53 | Pseudomonas aeruginosa PS75     | 66.5 | Scaffold        | Broad Institute                                |
| GCA_000233495 | Cluster_53 | Pseudomonas sp. 2_1_26          | 66.4 | Scaffold        | Broad Institute                                |
| GCA_000215795 | Cluster_53 | Pseudomonas aeruginosa HB15     | 66.2 | Contig          | University of Minho                            |
| GCA_000793785 | Cluster_53 | Pseudomonas aeruginosa 227      | 65.9 | Contig          | AstraZeneca                                    |
| GCA_000705175 | Cluster_53 | Pseudomonas aeruginosa C2773C   | 65.9 | Contig          | University of Texas at Austin                  |
| GCA_000794585 | Cluster_53 | Pseudomonas aeruginosa 264      | 65.9 | Contig          | AstraZeneca                                    |
| GCA_000790245 | Cluster_53 | Pseudomonas aeruginosa 51       | 66.4 | Contig          | AstraZeneca                                    |
| GCA_000796615 | Cluster_53 | Pseudomonas aeruginosa 375      | 66.6 | Contig          | AstraZeneca                                    |
| GCA_000439875 | Cluster_53 | Pseudomonas aeruginosa LCT-PA41 | 66.2 | Scaffold        | BGI Research Institute                         |
| GCA_000480845 | Cluster_53 | Pseudomonas aeruginosa BL15     | 66.5 | Scaffold        | Broad Institute                                |
| GCA_000789975 | Cluster_53 | Pseudomonas aeruginosa 38       | 66.5 | Contig          | AstraZeneca                                    |
| GCA_000480455 | Cluster_53 | Pseudomonas aeruginosa C41      | 66.2 | Scaffold        | Broad Institute                                |
| GCA_000791765 | Cluster_53 | Pseudomonas aeruginosa 127      | 66.5 | Contig          | AstraZeneca                                    |
| GCA_000480685 | Cluster_53 | Pseudomonas aeruginosa BL23     | 65.7 | Scaffold        | Broad Institute                                |
| GCA_000793185 | Cluster_53 | Pseudomonas aeruginosa 200      | 66.4 | Contig          | AstraZeneca                                    |
| GCA_000795725 | Cluster_53 | Pseudomonas aeruginosa 321      | 66.0 | Contig          | AstraZeneca                                    |
| GCA_000796465 | Cluster_53 | Pseudomonas aeruginosa 367      | 66.3 | Contig          | AstraZeneca                                    |
| GCA_000271365 | Cluster_53 | Pseudomonas aeruginosa DK2      | 66.3 | Complete Genome | Technical University of Denmark                |
| GCA_000796065 | Cluster_53 | Pseudomonas aeruginosa 347      | 66.5 | Contig          | AstraZeneca                                    |
| GCA_000783275 | Cluster_53 | Pseudomonas aeruginosa 9        | 65.8 | Scaffold        | China CDC                                      |
| GCA_000480725 | Cluster_53 | Pseudomonas aeruginosa BL21     | 66.1 | Scaffold        | Broad Institute                                |
| GCA_000647935 | Cluster_53 | Pseudomonas aeruginosa RB       | 66.6 | Scaffold        | Osaka University                               |
| GCA_000481125 | Cluster_53 | Pseudomonas aeruginosa BL01     | 66.4 | Scaffold        | Broad Institute                                |
| GCA_000629325 | Cluster_53 | Pseudomonas aeruginosa 3573     | 66.5 | Scaffold        | Broad Institute                                |
| GCA_000791225 | Cluster_53 | Pseudomonas aeruginosa 100      | 65.8 | Contig          | AstraZeneca                                    |
| GCA_000399805 | Cluster_53 | Pseudomonas aeruginosa VRFPA02  | 66.0 | Contig          | SANKARA NETHRALAYA, VISION RESEARCH FOUNDATION |
| GCA_000791545 | Cluster_53 | Pseudomonas aeruginosa 116      | 65.9 | Contig          | AstraZeneca                                    |

|               |            |                                       |      |                      |                                                                                                                   |
|---------------|------------|---------------------------------------|------|----------------------|-------------------------------------------------------------------------------------------------------------------|
| GCA_000790835 | Cluster_53 | Pseudomonas aeruginosa 81             | 66.0 | Contig               | AstraZeneca                                                                                                       |
| GCA_000629125 | Cluster_53 | Pseudomonas aeruginosa BWH030         | 66.4 | Scaffold             | Broad Institute                                                                                                   |
| GCA_000791665 | Cluster_53 | Pseudomonas aeruginosa 122            | 65.8 | Contig               | AstraZeneca                                                                                                       |
| GCA_000791145 | Cluster_53 | Pseudomonas aeruginosa 96             | 65.9 | Contig               | AstraZeneca                                                                                                       |
| GCA_000629025 | Cluster_53 | Pseudomonas aeruginosa BWH036         | 66.2 | Scaffold             | Broad Institute                                                                                                   |
| GCA_000796925 | Cluster_53 | Pseudomonas aeruginosa 390            | 66.6 | Contig               | AstraZeneca                                                                                                       |
| GCA_000796545 | Cluster_53 | Pseudomonas aeruginosa 371            | 66.1 | Contig               | AstraZeneca                                                                                                       |
| GCA_000215775 | Cluster_53 | Pseudomonas aeruginosa HB13           | 66.2 | Contig               | University of Minho                                                                                               |
| GCA_000794485 | Cluster_53 | Pseudomonas aeruginosa 259            | 66.0 | Contig               | AstraZeneca                                                                                                       |
| GCA_000793445 | Cluster_53 | Pseudomonas aeruginosa 213            | 66.1 | Contig               | AstraZeneca                                                                                                       |
| GCA_000790215 | Cluster_53 | Pseudomonas aeruginosa 50             | 65.9 | Contig               | AstraZeneca                                                                                                       |
| GCA_000568215 | Cluster_53 | Pseudomonas aeruginosa SG17M          | 66.0 | Contig               | Karolinska Institute                                                                                              |
| GCA_000583895 | Cluster_53 | Pseudomonas aeruginosa LESlike5       | 66.4 | Chromosome with gaps | IBIS, University Laval                                                                                            |
| GCA_000481625 | Cluster_53 | Pseudomonas aeruginosa BWHPSA004      | 66.5 | Scaffold             | Broad Institute                                                                                                   |
| GCA_000478465 | Cluster_53 | Pseudomonas aeruginosa str. Stone 130 | 65.4 | Scaffold             | Broad Institute                                                                                                   |
| GCA_000014625 | Cluster_53 | Pseudomonas aeruginosa UCBBP-PA14     | 66.3 | Complete Genome      | Massachusetts General Hospital                                                                                    |
| GCA_000795045 | Cluster_53 | Pseudomonas aeruginosa 287            | 66.0 | Contig               | AstraZeneca                                                                                                       |
| GCA_000791405 | Cluster_53 | Pseudomonas aeruginosa 109            | 66.1 | Contig               | AstraZeneca                                                                                                       |
| GCA_000412495 | Cluster_53 | Pseudomonas aeruginosa str. PA 17SCV  | 66.4 | Contig               | University of Strathclyde                                                                                         |
| GCA_000794605 | Cluster_53 | Pseudomonas aeruginosa 265            | 66.6 | Contig               | AstraZeneca                                                                                                       |
| GCA_000531435 | Cluster_53 | Pseudomonas aeruginosa PA38182        | 64.9 | Chromosome with gaps | BUGS                                                                                                              |
| GCA_000793865 | Cluster_53 | Pseudomonas aeruginosa 231            | 66.5 | Contig               | AstraZeneca                                                                                                       |
| GCA_000793255 | Cluster_53 | Pseudomonas aeruginosa 204            | 66.1 | Contig               | AstraZeneca                                                                                                       |
| GCA_000794645 | Cluster_53 | Pseudomonas aeruginosa 267            | 65.9 | Contig               | AstraZeneca                                                                                                       |
| GCA_000792045 | Cluster_53 | Pseudomonas aeruginosa 141            | 66.2 | Contig               | AstraZeneca                                                                                                       |
| GCA_000792505 | Cluster_53 | Pseudomonas aeruginosa 166            | 66.3 | Contig               | AstraZeneca                                                                                                       |
| GCA_000414035 | Cluster_53 | Pseudomonas aeruginosa RP73           | 66.5 | Complete Genome      | San Raffaele Scientific Institute, Division of Immunology, Transplantation and Infectious Diseases, Milano, Italy |
| GCA_000455505 | Cluster_53 | Pseudomonas aeruginosa B3-20M         | 66.2 | Contig               | DTU                                                                                                               |
| GCA_000792885 | Cluster_53 | Pseudomonas aeruginosa 185            | 65.9 | Contig               | AstraZeneca                                                                                                       |
| GCA_000484545 | Cluster_53 | Pseudomonas aeruginosa PAO1-VE13      | 66.6 | Chromosome with gaps | Marshall University School of Medicine                                                                            |
| GCA_000505965 | Cluster_53 | Pseudomonas aeruginosa JD314          | 66.7 | Contig               | University of Ottawa                                                                                              |
| GCA_000148745 | Cluster_53 | Pseudomonas aeruginosa 39016          | 65.5 | Chromosome           | Centre for Genomics Research, University of Liverpool                                                             |
| GCA_000481565 | Cluster_53 | Pseudomonas aeruginosa BWHPSA007      | 66.2 | Scaffold             | Broad Institute                                                                                                   |
| GCA_000792895 | Cluster_53 | Pseudomonas aeruginosa 186            | 66.3 | Contig               | AstraZeneca                                                                                                       |
| GCA_000793345 | Cluster_53 | Pseudomonas aeruginosa 208            | 66.2 | Contig               | AstraZeneca                                                                                                       |
| GCA_000496325 | Cluster_53 | Pseudomonas aeruginosa VRFPA05        | 65.8 | Contig               | SANKARA NETHRALAYA, VISION RESEARCH FOUNDATION                                                                    |
| GCA_000793765 | Cluster_53 | Pseudomonas aeruginosa 226            | 66.4 | Contig               | AstraZeneca                                                                                                       |
| GCA_000789745 | Cluster_53 | Pseudomonas aeruginosa 26             | 65.9 | Contig               | AstraZeneca                                                                                                       |
| GCA_000794095 | Cluster_53 | Pseudomonas aeruginosa 243            | 66.2 | Contig               | AstraZeneca                                                                                                       |
| GCA_000412395 | Cluster_53 | Pseudomonas aeruginosa str. E2UoS     | 66.2 | Contig               | University of Strathclyde                                                                                         |
| GCA_000504045 | Cluster_53 | Pseudomonas aeruginosa MTB-1          | 66.2 | Complete Genome      | Tohoku University                                                                                                 |
| GCA_000629245 | Cluster_53 | Pseudomonas aeruginosa 3577           | 66.4 | Scaffold             | Broad Institute                                                                                                   |
| GCA_000794325 | Cluster_53 | Pseudomonas aeruginosa 252            | 66.2 | Contig               | AstraZeneca                                                                                                       |
| GCA_000408865 | Cluster_53 | Pseudomonas aeruginosa PAK            | 66.4 | Scaffold             | University of Texas at Austin                                                                                     |
| GCA_000412375 | Cluster_53 | Pseudomonas aeruginosa str. MSH 3     | 66.4 | Contig               | University of Strathclyde                                                                                         |
| GCA_000481025 | Cluster_53 | Pseudomonas aeruginosa BL06           | 65.9 | Scaffold             | Broad Institute                                                                                                   |
| GCA_000790965 | Cluster_53 | Pseudomonas aeruginosa 87             | 66.4 | Contig               | AstraZeneca                                                                                                       |
| GCA_000796175 | Cluster_53 | Pseudomonas aeruginosa 353            | 66.5 | Contig               | AstraZeneca                                                                                                       |
| GCA_000796165 | Cluster_53 | Pseudomonas aeruginosa 352            | 66.1 | Contig               | AstraZeneca                                                                                                       |

|               |            |                                   |      |                      |                                                     |
|---------------|------------|-----------------------------------|------|----------------------|-----------------------------------------------------|
| GCA_000629425 | Cluster_53 | Pseudomonas aeruginosa BWH058     | 66.1 | Scaffold             | Broad Institute                                     |
| GCA_000792805 | Cluster_53 | Pseudomonas aeruginosa 181        | 65.8 | Contig               | AstraZeneca                                         |
| GCA_000297295 | Cluster_53 | Pseudomonas aeruginosa ATCC 25324 | 65.9 | Contig               | University of Washington                            |
| GCA_000506205 | Cluster_53 | Pseudomonas aeruginosa JD324      | 66.5 | Contig               | University of Ottawa                                |
| GCA_000359565 | Cluster_53 | Pseudomonas aeruginosa PA45       | 66.3 | Contig               | CIBIO (Unitn)                                       |
| GCA_000480395 | Cluster_53 | Pseudomonas aeruginosa C52        | 65.9 | Scaffold             | Broad Institute                                     |
| GCA_000795625 | Cluster_53 | Pseudomonas aeruginosa 316        | 65.9 | Contig               | AstraZeneca                                         |
| GCA_000455545 | Cluster_53 | Pseudomonas aeruginosa B3-1811    | 66.2 | Contig               | DTU                                                 |
| GCA_000795225 | Cluster_53 | Pseudomonas aeruginosa 296        | 66.4 | Contig               | AstraZeneca                                         |
| GCA_000480945 | Cluster_53 | Pseudomonas aeruginosa BL10       | 66.3 | Scaffold             | Broad Institute                                     |
| GCA_000341565 | Cluster_53 | Pseudomonas aeruginosa 18A        | 66.5 | Contig               | UNSW                                                |
| GCA_000792305 | Cluster_53 | Pseudomonas aeruginosa 156        | 65.8 | Contig               | AstraZeneca                                         |
| GCA_000797265 | Cluster_53 | Pseudomonas aeruginosa 407        | 66.5 | Contig               | AstraZeneca                                         |
| GCA_000265035 | Cluster_53 | Pseudomonas aeruginosa XMG        | 66.4 | Contig               | Shanghai Jiao Tong University                       |
| GCA_000583955 | Cluster_53 | Pseudomonas aeruginosa LESB65     | 66.4 | Chromosome with gaps | IBIS, University Laval                              |
| GCA_000794285 | Cluster_53 | Pseudomonas aeruginosa 250        | 66.2 | Contig               | AstraZeneca                                         |
| GCA_000793725 | Cluster_53 | Pseudomonas aeruginosa 224        | 66.4 | Contig               | AstraZeneca                                         |
| GCA_000794805 | Cluster_53 | Pseudomonas aeruginosa 275        | 66.0 | Contig               | AstraZeneca                                         |
| GCA_000505985 | Cluster_53 | Pseudomonas aeruginosa JD315      | 66.5 | Contig               | University of Ottawa                                |
| GCA_000794005 | Cluster_53 | Pseudomonas aeruginosa 238        | 66.5 | Contig               | AstraZeneca                                         |
| GCA_000794725 | Cluster_53 | Pseudomonas aeruginosa 271        | 65.3 | Contig               | AstraZeneca                                         |
| GCA_000480355 | Cluster_53 | Pseudomonas aeruginosa CF614      | 66.0 | Scaffold             | Broad Institute                                     |
| GCA_000790785 | Cluster_53 | Pseudomonas aeruginosa 78         | 66.2 | Contig               | AstraZeneca                                         |
| GCA_000714515 | Cluster_53 | Pseudomonas aeruginosa PAO1H2O    | 66.3 | Chromosome with gaps | University of Virginia                              |
| GCA_000629065 | Cluster_53 | Pseudomonas aeruginosa BWH033     | 66.0 | Scaffold             | Broad Institute                                     |
| GCA_000481485 | Cluster_53 | Pseudomonas aeruginosa BWHPA011   | 65.8 | Scaffold             | Broad Institute                                     |
| GCA_000793705 | Cluster_53 | Pseudomonas aeruginosa 223        | 66.4 | Contig               | AstraZeneca                                         |
| GCA_000481605 | Cluster_53 | Pseudomonas aeruginosa BWHPA005   | 66.1 | Scaffold             | Broad Institute                                     |
| GCA_000290555 | Cluster_53 | Pseudomonas aeruginosa PABLO56    | 65.5 | Scaffold             | Northwestern University Feinberg School of Medicine |
| GCA_000481965 | Cluster_53 | Pseudomonas aeruginosa MSH10 1    | 66.4 | Scaffold             | Broad Institute                                     |
| GCA_000796845 | Cluster_53 | Pseudomonas aeruginosa 386        | 65.8 | Contig               | AstraZeneca                                         |
| GCA_000790725 | Cluster_53 | Pseudomonas aeruginosa 75         | 66.0 | Contig               | AstraZeneca                                         |
| GCA_000520255 | Cluster_53 | Pseudomonas aeruginosa BWHPA047   | 66.4 | Scaffold             | Broad Institute                                     |
| GCA_000629565 | Cluster_53 | Pseudomonas aeruginosa BWH051     | 66.2 | Scaffold             | Broad Institute                                     |
| GCA_000629165 | Cluster_53 | Pseudomonas aeruginosa 3581       | 66.0 | Scaffold             | Broad Institute                                     |
| GCA_000796585 | Cluster_53 | Pseudomonas aeruginosa 373        | 66.5 | Contig               | AstraZeneca                                         |
| GCA_000794265 | Cluster_53 | Pseudomonas aeruginosa 249        | 66.0 | Contig               | AstraZeneca                                         |
| GCA_000796125 | Cluster_53 | Pseudomonas aeruginosa 350        | 66.1 | Contig               | AstraZeneca                                         |
| GCA_000792325 | Cluster_53 | Pseudomonas aeruginosa 157        | 66.1 | Contig               | AstraZeneca                                         |
| GCA_000223945 | Cluster_53 | Pseudomonas aeruginosa 19BR       | 66.1 | Complete Genome      | IBIS, Universite Laval                              |
| GCA_000481385 | Cluster_53 | Pseudomonas aeruginosa BWHPA016   | 66.4 | Scaffold             | Broad Institute                                     |
| GCA_000793315 | Cluster_53 | Pseudomonas aeruginosa 207        | 66.0 | Contig               | AstraZeneca                                         |
| GCA_000793165 | Cluster_53 | Pseudomonas aeruginosa 199        | 66.5 | Contig               | AstraZeneca                                         |
| GCA_000647615 | Cluster_53 | Pseudomonas aeruginosa ID4365     | 66.1 | Contig               | Universidad Nacional Autonoma de Mexico             |
| GCA_000792675 | Cluster_53 | Pseudomonas aeruginosa 175        | 66.3 | Contig               | AstraZeneca                                         |
| GCA_000412415 | Cluster_53 | Pseudomonas aeruginosa str. PA 62 | 66.3 | Contig               | University of Strathclyde                           |
| GCA_000481945 | Cluster_53 | Pseudomonas aeruginosa CF127      | 65.9 | Scaffold             | Broad Institute                                     |
| GCA_000407905 | Cluster_53 | Pseudomonas aeruginosa MSH-10     | 66.4 | Scaffold             | Broad Institute                                     |
| GCA_000792285 | Cluster_53 | Pseudomonas aeruginosa 155        | 66.3 | Contig               | AstraZeneca                                         |

|               |            |                                       |      |                 |                                                                                                        |
|---------------|------------|---------------------------------------|------|-----------------|--------------------------------------------------------------------------------------------------------|
| GCA_000795435 | Cluster_53 | Pseudomonas aeruginosa 307            | 65.8 | Contig          | AstraZeneca                                                                                            |
| GCA_000789495 | Cluster_53 | Pseudomonas aeruginosa 14             | 66.1 | Contig          | AstraZeneca                                                                                            |
| GCA_000647635 | Cluster_53 | Pseudomonas aeruginosa IGB83          | 66.4 | Contig          | Universidad Nacional Autonoma de Mexico                                                                |
| GCA_000520415 | Cluster_53 | Pseudomonas aeruginosa BWHPA039       | 66.0 | Scaffold        | Broad Institute                                                                                        |
| GCA_000481205 | Cluster_53 | Pseudomonas aeruginosa BWHPA025       | 66.5 | Scaffold        | Broad Institute                                                                                        |
| GCA_000629285 | Cluster_53 | Pseudomonas aeruginosa 3575           | 66.0 | Scaffold        | Broad Institute                                                                                        |
| GCA_000796945 | Cluster_53 | Pseudomonas aeruginosa 391            | 66.4 | Contig          | AstraZeneca                                                                                            |
| GCA_000795635 | Cluster_53 | Pseudomonas aeruginosa 317            | 65.9 | Contig          | AstraZeneca                                                                                            |
| GCA_000794195 | Cluster_53 | Pseudomonas aeruginosa 247            | 66.1 | Contig          | AstraZeneca                                                                                            |
| GCA_000467675 | Cluster_53 | Pseudomonas aeruginosa VRFPA03        | 65.2 | Contig          | SANKARA NETHRALAYA, VISION RESEARCH FOUNDATION                                                         |
| GCA_000629345 | Cluster_53 | Pseudomonas aeruginosa PAO1-GFP       | 66.5 | Scaffold        | Broad Institute                                                                                        |
| GCA_000790625 | Cluster_53 | Pseudomonas aeruginosa 70             | 66.3 | Contig          | AstraZeneca                                                                                            |
| GCA_000480765 | Cluster_53 | Pseudomonas aeruginosa BL19           | 66.4 | Scaffold        | Broad Institute                                                                                        |
| GCA_000480665 | Cluster_53 | Pseudomonas aeruginosa BL24           | 66.1 | Scaffold        | Broad Institute                                                                                        |
| GCA_000481465 | Cluster_53 | Pseudomonas aeruginosa BWHPA012       | 66.3 | Scaffold        | Broad Institute                                                                                        |
| GCA_000796475 | Cluster_53 | Pseudomonas aeruginosa 368            | 65.9 | Contig          | AstraZeneca                                                                                            |
| GCA_000793945 | Cluster_53 | Pseudomonas aeruginosa 235            | 66.0 | Contig          | AstraZeneca                                                                                            |
| GCA_000796025 | Cluster_53 | Pseudomonas aeruginosa 345            | 65.8 | Contig          | AstraZeneca                                                                                            |
| GCA_000797045 | Cluster_53 | Pseudomonas aeruginosa 396            | 66.4 | Contig          | AstraZeneca                                                                                            |
| GCA_000791105 | Cluster_53 | Pseudomonas aeruginosa 94             | 66.1 | Contig          | AstraZeneca                                                                                            |
| GCA_000797395 | Cluster_53 | Pseudomonas aeruginosa 413            | 65.5 | Contig          | AstraZeneca                                                                                            |
| GCA_000796385 | Cluster_53 | Pseudomonas aeruginosa 363            | 66.1 | Contig          | AstraZeneca                                                                                            |
| GCA_000797305 | Cluster_53 | Pseudomonas aeruginosa 409            | 66.4 | Contig          | AstraZeneca                                                                                            |
| GCA_000793685 | Cluster_53 | Pseudomonas aeruginosa 222            | 66.2 | Contig          | AstraZeneca                                                                                            |
| GCA_000792825 | Cluster_53 | Pseudomonas aeruginosa 182            | 66.2 | Contig          | AstraZeneca                                                                                            |
| GCA_000790935 | Cluster_53 | Pseudomonas aeruginosa 86             | 66.0 | Contig          | AstraZeneca                                                                                            |
| GCA_000698765 | Cluster_53 | Pseudomonas aeruginosa                | 66.5 | Contig          | International Centre for Genetic Engineering and Biotechnology                                         |
| GCA_000568855 | Cluster_53 | Pseudomonas aeruginosa PAK 1          | 66.4 | Scaffold        | University of Texas at Austin                                                                          |
| GCA_000790805 | Cluster_53 | Pseudomonas aeruginosa 79             | 66.3 | Contig          | AstraZeneca                                                                                            |
| GCA_000795465 | Cluster_53 | Pseudomonas aeruginosa 308            | 66.0 | Contig          | AstraZeneca                                                                                            |
| GCA_000629525 | Cluster_53 | Pseudomonas aeruginosa BWH053         | 66.2 | Scaffold        | Broad Institute                                                                                        |
| GCA_000480965 | Cluster_53 | Pseudomonas aeruginosa BL09           | 66.0 | Scaffold        | Broad Institute                                                                                        |
| GCA_000220025 | Cluster_53 | Pseudomonas aeruginosa AES-1R         | 66.5 | Contig          | Bacterial Pathogens in CF group, Sydney Medical School, The University of Sydney Sydney Australia 2006 |
| GCA_000480645 | Cluster_53 | Pseudomonas aeruginosa BL25           | 66.3 | Scaffold        | Broad Institute                                                                                        |
| GCA_000790985 | Cluster_53 | Pseudomonas aeruginosa 88             | 66.0 | Contig          | AstraZeneca                                                                                            |
| GCA_000505945 | Cluster_53 | Pseudomonas aeruginosa JD312          | 66.6 | Contig          | University of Ottawa                                                                                   |
| GCA_000795685 | Cluster_53 | Pseudomonas aeruginosa 319            | 65.9 | Contig          | AstraZeneca                                                                                            |
| GCA_000506045 | Cluster_53 | Pseudomonas aeruginosa JD326          | 66.5 | Contig          | University of Ottawa                                                                                   |
| GCA_000506165 | Cluster_53 | Pseudomonas aeruginosa JD320          | 66.5 | Contig          | University of Ottawa                                                                                   |
| GCA_000481885 | Cluster_53 | Pseudomonas aeruginosa CF5            | 66.6 | Scaffold        | Broad Institute                                                                                        |
| GCA_000796985 | Cluster_53 | Pseudomonas aeruginosa 393            | 66.1 | Contig          | AstraZeneca                                                                                            |
| GCA_000794995 | Cluster_53 | Pseudomonas aeruginosa 285            | 66.5 | Contig          | AstraZeneca                                                                                            |
| GCA_000590905 | Cluster_53 | Pseudomonas aeruginosa MW3a           | 66.3 | Contig          | University of Malaya                                                                                   |
| GCA_000454505 | Cluster_53 | Pseudomonas aeruginosa B3-208         | 66.2 | Contig          | DTU                                                                                                    |
| GCA_000797185 | Cluster_53 | Pseudomonas aeruginosa 403            | 66.2 | Contig          | AstraZeneca                                                                                            |
| GCA_000685845 | Cluster_53 | Pseudomonas aeruginosa NCAIM B.001380 | 66.1 | Contig          | DOE Joint Genome Institute                                                                             |
| GCA_000226155 | Cluster_53 | Pseudomonas aeruginosa M18            | 66.5 | Complete Genome | School of Life Sciences and Biotechnology, Shanghai Jiao Tong University, PR China                     |
| GCA_000789555 | Cluster_53 | Pseudomonas aeruginosa 18             | 65.6 | Contig          | AstraZeneca                                                                                            |
| GCA_000790765 | Cluster_53 | Pseudomonas aeruginosa 77             | 66.0 | Contig          | AstraZeneca                                                                                            |

|               |            |                                    |      |                      |                                                                   |
|---------------|------------|------------------------------------|------|----------------------|-------------------------------------------------------------------|
| GCA_000481065 | Cluster_53 | Pseudomonas aeruginosa BL04        | 65.9 | Scaffold             | Broad Institute                                                   |
| GCA_000496605 | Cluster_53 | Pseudomonas aeruginosa PA1         | 66.3 | Complete Genome      | Department of Microbiology, The Third Military Medical University |
| GCA_000480495 | Cluster_53 | Pseudomonas aeruginosa C23         | 66.2 | Scaffold             | Broad Institute                                                   |
| GCA_000791275 | Cluster_53 | Pseudomonas aeruginosa 103         | 66.0 | Contig               | AstraZeneca                                                       |
| GCA_000626655 | Cluster_53 | Pseudomonas aeruginosa PA96        | 65.7 | Chromosome with gaps | Universite Laval                                                  |
| GCA_000510305 | Cluster_53 | Pseudomonas aeruginosa SCV20265    | 66.3 | Complete Genome      | Helmholtz Center for Infection Research                           |
| GCA_000506305 | Cluster_53 | Pseudomonas aeruginosa JD331       | 66.5 | Contig               | University of Ottawa                                              |
| GCA_000796745 | Cluster_53 | Pseudomonas aeruginosa 381         | 66.4 | Contig               | AstraZeneca                                                       |
| GCA_000259025 | Cluster_53 | Pseudomonas aeruginosa PADK2_CF510 | 66.1 | Contig               | DTU Systems Biology                                               |
| GCA_000481325 | Cluster_53 | Pseudomonas aeruginosa BWHPA019    | 66.4 | Scaffold             | Broad Institute                                                   |
| GCA_000796655 | Cluster_53 | Pseudomonas aeruginosa 377         | 66.5 | Contig               | AstraZeneca                                                       |
| GCA_000283055 | Cluster_53 | Pseudomonas aeruginosa DQ8         | 66.0 | Contig               | Shanghai Jiao Tong University                                     |
| GCA_000797285 | Cluster_53 | Pseudomonas aeruginosa 408         | 66.4 | Contig               | AstraZeneca                                                       |
| GCA_000633495 | Cluster_53 | Pseudomonas aeruginosa H11         | 66.4 | Contig               | University of Malaya                                              |
| GCA_000791625 | Cluster_53 | Pseudomonas aeruginosa 120         | 66.4 | Contig               | AstraZeneca                                                       |
| GCA_000791325 | Cluster_53 | Pseudomonas aeruginosa 105         | 66.6 | Contig               | AstraZeneca                                                       |
| GCA_000794175 | Cluster_53 | Pseudomonas aeruginosa 245         | 65.6 | Contig               | AstraZeneca                                                       |
| GCA_000793455 | Cluster_53 | Pseudomonas aeruginosa 214         | 66.0 | Contig               | AstraZeneca                                                       |
| GCA_000791385 | Cluster_53 | Pseudomonas aeruginosa 108         | 66.0 | Contig               | AstraZeneca                                                       |
| GCA_000789925 | Cluster_53 | Pseudomonas aeruginosa 35          | 66.2 | Contig               | AstraZeneca                                                       |
| GCA_000796085 | Cluster_53 | Pseudomonas aeruginosa 348         | 66.3 | Contig               | AstraZeneca                                                       |
| GCA_000506025 | Cluster_53 | Pseudomonas aeruginosa JD323       | 66.6 | Contig               | University of Ottawa                                              |
| GCA_000795235 | Cluster_53 | Pseudomonas aeruginosa 297         | 66.1 | Contig               | AstraZeneca                                                       |
| GCA_000481985 | Cluster_53 | Pseudomonas aeruginosa MSH3        | 66.4 | Scaffold             | Broad Institute                                                   |
| GCA_00045705  | Cluster_53 | Pseudomonas aeruginosa WCS5        | 66.1 | Contig               | University of Illinois at Chicago                                 |
| GCA_000505825 | Cluster_53 | Pseudomonas aeruginosa PK6         | 66.9 | Contig               | Saurashtra University                                             |
| GCA_000791365 | Cluster_53 | Pseudomonas aeruginosa 107         | 66.4 | Contig               | AstraZeneca                                                       |
| GCA_000481505 | Cluster_53 | Pseudomonas aeruginosa BWHPA010    | 66.1 | Scaffold             | Broad Institute                                                   |
| GCA_000480785 | Cluster_53 | Pseudomonas aeruginosa BL18        | 66.4 | Scaffold             | Broad Institute                                                   |
| GCA_000794625 | Cluster_53 | Pseudomonas aeruginosa 266         | 66.5 | Contig               | AstraZeneca                                                       |
| GCA_000794735 | Cluster_53 | Pseudomonas aeruginosa 272         | 66.1 | Contig               | AstraZeneca                                                       |
| GCA_000793385 | Cluster_53 | Pseudomonas aeruginosa 210         | 66.4 | Contig               | AstraZeneca                                                       |
| GCA_000567865 | Cluster_53 | Pseudomonas aeruginosa VRFPA06     | 65.8 | Contig               | SANKARA NETHRALAYA, VISION RESEARCH FOUNDATION                    |
| GCA_000796005 | Cluster_53 | Pseudomonas aeruginosa 344         | 66.2 | Contig               | AstraZeneca                                                       |
| GCA_000790305 | Cluster_53 | Pseudomonas aeruginosa 54          | 66.0 | Contig               | AstraZeneca                                                       |
| GCA_000481865 | Cluster_53 | Pseudomonas aeruginosa X24509      | 66.3 | Scaffold             | Broad Institute                                                   |
| GCA_000790505 | Cluster_53 | Pseudomonas aeruginosa 64          | 65.9 | Contig               | AstraZeneca                                                       |
| GCA_000794505 | Cluster_53 | Pseudomonas aeruginosa 260         | 66.1 | Contig               | AstraZeneca                                                       |
| GCA_000790605 | Cluster_53 | Pseudomonas aeruginosa 69          | 66.4 | Contig               | AstraZeneca                                                       |
| GCA_000791485 | Cluster_53 | Pseudomonas aeruginosa 113         | 65.9 | Contig               | AstraZeneca                                                       |
| GCA_000795905 | Cluster_53 | Pseudomonas aeruginosa 330         | 66.0 | Contig               | AstraZeneca                                                       |
| GCA_000795405 | Cluster_53 | Pseudomonas aeruginosa 305         | 66.4 | Contig               | AstraZeneca                                                       |
| GCA_000296325 | Cluster_53 | Pseudomonas aeruginosa PA0579      | 66.5 | Contig               | Marshall University School of Medicine                            |
| GCA_000505925 | Cluster_53 | Pseudomonas aeruginosa JD310       | 66.5 | Contig               | University of Ottawa                                              |
| GCA_000789785 | Cluster_53 | Pseudomonas aeruginosa 28          | 66.1 | Contig               | AstraZeneca                                                       |
| GCA_000789645 | Cluster_53 | Pseudomonas aeruginosa 22          | 66.3 | Contig               | AstraZeneca                                                       |
| GCA_000705155 | Cluster_53 | Pseudomonas aeruginosa C1913C      | 66.2 | Contig               | University of Texas at Austin                                     |
| GCA_000790325 | Cluster_53 | Pseudomonas aeruginosa 55          | 65.6 | Contig               | AstraZeneca                                                       |
| GCA_000481005 | Cluster_53 | Pseudomonas aeruginosa BL07        | 66.3 | Scaffold             | Broad Institute                                                   |

|               |            |                                    |      |                      |                                                                                                                           |
|---------------|------------|------------------------------------|------|----------------------|---------------------------------------------------------------------------------------------------------------------------|
| GCA_000481405 | Cluster_53 | Pseudomonas aeruginosa BWHPA015    | 66.5 | Scaffold             | Broad Institute                                                                                                           |
| GCA_000795605 | Cluster_53 | Pseudomonas aeruginosa 315         | 66.1 | Contig               | AstraZeneca                                                                                                               |
| GCA_000504485 | Cluster_53 | Pseudomonas aeruginosa ATCC 15442  | 66.2 | Contig               | State Key Laboratory of Microbial Metabolism and School of Life Sciences and Biotechnology, Shanghai Jiao Tong University |
| GCA_000506065 | Cluster_53 | Pseudomonas aeruginosa JD328       | 66.5 | Contig               | University of Ottawa                                                                                                      |
| GCA_000794455 | Cluster_53 | Pseudomonas aeruginosa 258         | 66.0 | Contig               | AstraZeneca                                                                                                               |
| GCA_000793985 | Cluster_53 | Pseudomonas aeruginosa 237         | 65.9 | Contig               | AstraZeneca                                                                                                               |
| GCA_000792855 | Cluster_53 | Pseudomonas aeruginosa 184         | 65.9 | Contig               | AstraZeneca                                                                                                               |
| GCA_000796095 | Cluster_53 | Pseudomonas aeruginosa 349         | 66.1 | Contig               | AstraZeneca                                                                                                               |
| GCA_000496645 | Cluster_53 | Pseudomonas aeruginosa PA1R        | 66.3 | Complete Genome      | Department of Microbiology, The Third Military Medical University                                                         |
| GCA_000480595 | Cluster_53 | Pseudomonas aeruginosa M8A.2       | 66.4 | Scaffold             | Broad Institute                                                                                                           |
| GCA_000796295 | Cluster_53 | Pseudomonas aeruginosa 359         | 66.0 | Contig               | AstraZeneca                                                                                                               |
| GCA_000794705 | Cluster_53 | Pseudomonas aeruginosa 270         | 65.5 | Contig               | AstraZeneca                                                                                                               |
| GCA_000481525 | Cluster_53 | Pseudomonas aeruginosa BWHPA009    | 66.4 | Scaffold             | Broad Institute                                                                                                           |
| GCA_000796725 | Cluster_53 | Pseudomonas aeruginosa 380         | 65.8 | Contig               | AstraZeneca                                                                                                               |
| GCA_000172395 | Cluster_53 | Pseudomonas aeruginosa PAb1        | 66.8 | Contig               | The University of Maryland Center For Bioinformatics & Computational Biology                                              |
| GCA_000503175 | Cluster_53 | Pseudomonas aeruginosa DHS29       | 65.8 | Contig               | Hospital of Besancon - France                                                                                             |
| GCA_000796255 | Cluster_53 | Pseudomonas aeruginosa 357         | 66.0 | Contig               | AstraZeneca                                                                                                               |
| GCA_000412435 | Cluster_53 | Pseudomonas aeruginosa str. MSH 10 | 66.4 | Contig               | University of Strathclyde                                                                                                 |
| GCA_000796905 | Cluster_53 | Pseudomonas aeruginosa 389         | 66.5 | Contig               | AstraZeneca                                                                                                               |
| GCA_000796555 | Cluster_53 | Pseudomonas aeruginosa 372         | 66.4 | Contig               | AstraZeneca                                                                                                               |
| GCA_000506225 | Cluster_53 | Pseudomonas aeruginosa JD325       | 66.6 | Contig               | University of Ottawa                                                                                                      |
| GCA_000791985 | Cluster_53 | Pseudomonas aeruginosa 138         | 66.2 | Contig               | AstraZeneca                                                                                                               |
| GCA_000793845 | Cluster_53 | Pseudomonas aeruginosa 230         | 66.3 | Contig               | AstraZeneca                                                                                                               |
| GCA_000793055 | Cluster_53 | Pseudomonas aeruginosa 194         | 65.8 | Contig               | AstraZeneca                                                                                                               |
| GCA_000793245 | Cluster_53 | Pseudomonas aeruginosa 203         | 66.3 | Contig               | AstraZeneca                                                                                                               |
| GCA_000481425 | Cluster_53 | Pseudomonas aeruginosa BWHPA014    | 66.5 | Scaffold             | Broad Institute                                                                                                           |
| GCA_000797055 | Cluster_53 | Pseudomonas aeruginosa 397         | 66.4 | Contig               | AstraZeneca                                                                                                               |
| GCA_000795085 | Cluster_53 | Pseudomonas aeruginosa 289         | 66.2 | Contig               | AstraZeneca                                                                                                               |
| GCA_000480865 | Cluster_53 | Pseudomonas aeruginosa BL14        | 65.9 | Scaffold             | Broad Institute                                                                                                           |
| GCA_000506125 | Cluster_53 | Pseudomonas aeruginosa JD316       | 66.6 | Contig               | University of Ottawa                                                                                                      |
| GCA_000794825 | Cluster_53 | Pseudomonas aeruginosa 276         | 66.5 | Contig               | AstraZeneca                                                                                                               |
| GCA_000750905 | Cluster_53 | Pseudomonas aeruginosa 5           | 65.9 | Chromosome with gaps | IGH                                                                                                                       |
| GCA_000611995 | Cluster_53 | Pseudomonas aeruginosa PA99        | 66.1 | Scaffold             | Northwestern University Feinberg School of Medicine                                                                       |
| GCA_000705195 | Cluster_53 | Pseudomonas aeruginosa C0324C      | 66.0 | Contig               | University of Texas at Austin                                                                                             |
| GCA_000790915 | Cluster_53 | Pseudomonas aeruginosa 85          | 66.2 | Contig               | AstraZeneca                                                                                                               |
| GCA_000792725 | Cluster_53 | Pseudomonas aeruginosa 177         | 66.1 | Contig               | AstraZeneca                                                                                                               |
| GCA_000794985 | Cluster_53 | Pseudomonas aeruginosa 284         | 66.1 | Contig               | AstraZeneca                                                                                                               |
| GCA_000481045 | Cluster_53 | Pseudomonas aeruginosa BL05        | 66.5 | Scaffold             | Broad Institute                                                                                                           |
| GCA_000790405 | Cluster_53 | Pseudomonas aeruginosa 59          | 66.1 | Contig               | AstraZeneca                                                                                                               |
| GCA_000796645 | Cluster_53 | Pseudomonas aeruginosa 376         | 66.1 | Contig               | AstraZeneca                                                                                                               |
| GCA_000629505 | Cluster_53 | Pseudomonas aeruginosa BWH054      | 65.9 | Scaffold             | Broad Institute                                                                                                           |
| GCA_000297355 | Cluster_53 | Pseudomonas aeruginosa E2 1        | 66.4 | Contig               | University of Washington                                                                                                  |
| GCA_000632755 | Cluster_53 | Pseudomonas otitidis               | 66.4 | Scaffold             | Liaoning University                                                                                                       |
| GCA_000790345 | Cluster_53 | Pseudomonas aeruginosa 56          | 66.1 | Contig               | AstraZeneca                                                                                                               |
| GCA_000629265 | Cluster_53 | Pseudomonas aeruginosa 3576        | 66.2 | Scaffold             | Broad Institute                                                                                                           |
| GCA_000751715 | Cluster_53 | Pseudomonas aeruginosa 6           | 65.8 | Contig               | UB                                                                                                                        |
| GCA_000795875 | Cluster_53 | Pseudomonas aeruginosa 329         | 66.4 | Contig               | AstraZeneca                                                                                                               |
| GCA_000790445 | Cluster_53 | Pseudomonas aeruginosa 61          | 66.4 | Contig               | AstraZeneca                                                                                                               |
| GCA_000796705 | Cluster_53 | Pseudomonas aeruginosa 379         | 66.4 | Contig               | AstraZeneca                                                                                                               |

|               |            |                                   |      |          |                                      |
|---------------|------------|-----------------------------------|------|----------|--------------------------------------|
| GCA_000629385 | Cluster_53 | Pseudomonas aeruginosa BWH060     | 66.2 | Scaffold | Broad Institute                      |
| GCA_000481745 | Cluster_53 | Pseudomonas aeruginosa 6077       | 66.0 | Scaffold | Broad Institute                      |
| GCA_000792625 | Cluster_53 | Pseudomonas aeruginosa 172        | 66.2 | Contig   | AstraZeneca                          |
| GCA_000791825 | Cluster_53 | Pseudomonas aeruginosa 130        | 66.5 | Contig   | AstraZeneca                          |
| GCA_000791915 | Cluster_53 | Pseudomonas aeruginosa 135        | 66.0 | Contig   | AstraZeneca                          |
| GCA_000794745 | Cluster_53 | Pseudomonas aeruginosa 273        | 65.9 | Contig   | AstraZeneca                          |
| GCA_000342145 | Cluster_53 | Pseudomonas aeruginosa PA21_ST175 | 66.1 | Contig   | Hospital Universitario 12 de Octubre |
| GCA_000481145 | Cluster_53 | Pseudomonas aeruginosa BWHPSA028  | 65.3 | Scaffold | Broad Institute                      |
| GCA_000793955 | Cluster_53 | Pseudomonas aeruginosa 236        | 66.1 | Contig   | AstraZeneca                          |
| GCA_000792475 | Cluster_53 | Pseudomonas aeruginosa 165        | 66.3 | Contig   | AstraZeneca                          |
| GCA_000795205 | Cluster_53 | Pseudomonas aeruginosa 295        | 66.2 | Contig   | AstraZeneca                          |
| GCA_000794515 | Cluster_53 | Pseudomonas aeruginosa 261        | 65.9 | Contig   | AstraZeneca                          |
| GCA_000792515 | Cluster_53 | Pseudomonas aeruginosa 167        | 66.0 | Contig   | AstraZeneca                          |
| GCA_000790205 | Cluster_53 | Pseudomonas aeruginosa 49         | 66.3 | Contig   | AstraZeneca                          |
| GCA_000791585 | Cluster_53 | Pseudomonas aeruginosa 118        | 66.4 | Contig   | AstraZeneca                          |
| GCA_000795945 | Cluster_53 | Pseudomonas aeruginosa 341        | 65.8 | Contig   | AstraZeneca                          |
| GCA_000791705 | Cluster_53 | Pseudomonas aeruginosa 124        | 66.1 | Contig   | AstraZeneca                          |
| GCA_000793415 | Cluster_53 | Pseudomonas aeruginosa 212        | 66.2 | Contig   | AstraZeneca                          |
| GCA_000520235 | Cluster_53 | Pseudomonas aeruginosa BWHPSA048  | 66.4 | Scaffold | Broad Institute                      |
| GCA_000629405 | Cluster_53 | Pseudomonas aeruginosa BWH059     | 66.1 | Scaffold | Broad Institute                      |
| GCA_000414275 | Cluster_53 | Pseudomonas aeruginosa PAO1_1     | 66.4 | Contig   | Boise State University               |
| GCA_000794785 | Cluster_53 | Pseudomonas aeruginosa 274        | 65.8 | Contig   | AstraZeneca                          |
| GCA_000794185 | Cluster_53 | Pseudomonas aeruginosa 246        | 66.0 | Contig   | AstraZeneca                          |
| GCA_000792635 | Cluster_53 | Pseudomonas aeruginosa 173        | 66.3 | Contig   | AstraZeneca                          |
| GCA_000480905 | Cluster_53 | Pseudomonas aeruginosa BL12       | 65.6 | Scaffold | Broad Institute                      |
| GCA_000506265 | Cluster_53 | Pseudomonas aeruginosa JD329      | 66.4 | Contig   | University of Ottawa                 |
| GCA_000513235 | Cluster_53 | Pseudomonas aeruginosa MH27       | 65.9 | Contig   | CeBiTec                              |
| GCA_000791565 | Cluster_53 | Pseudomonas aeruginosa 117        | 66.2 | Contig   | AstraZeneca                          |
| GCA_000797025 | Cluster_53 | Pseudomonas aeruginosa 395        | 66.0 | Contig   | AstraZeneca                          |
| GCA_000797105 | Cluster_53 | Pseudomonas aeruginosa 399        | 66.4 | Contig   | AstraZeneca                          |
| GCA_000791235 | Cluster_53 | Pseudomonas aeruginosa 101        | 66.4 | Contig   | AstraZeneca                          |
| GCA_000152525 | Cluster_53 | Pseudomonas aeruginosa C3719      | 66.5 | Scaffold | Broad Institute                      |
| GCA_000797225 | Cluster_53 | Pseudomonas aeruginosa 405        | 66.3 | Contig   | AstraZeneca                          |
| GCA_000629545 | Cluster_53 | Pseudomonas aeruginosa BWH052     | 66.2 | Scaffold | Broad Institute                      |
| GCA_000480515 | Cluster_53 | Pseudomonas aeruginosa C20        | 66.2 | Scaffold | Broad Institute                      |
| GCA_000790525 | Cluster_53 | Pseudomonas aeruginosa 65         | 66.5 | Contig   | AstraZeneca                          |
| GCA_000794365 | Cluster_53 | Pseudomonas aeruginosa 254        | 66.2 | Contig   | AstraZeneca                          |
| GCA_000793025 | Cluster_53 | Pseudomonas aeruginosa 192        | 66.1 | Contig   | AstraZeneca                          |
| GCA_000793645 | Cluster_53 | Pseudomonas aeruginosa 220        | 66.1 | Contig   | AstraZeneca                          |
| GCA_000793125 | Cluster_53 | Pseudomonas aeruginosa 197        | 66.4 | Contig   | AstraZeneca                          |
| GCA_000793295 | Cluster_53 | Pseudomonas aeruginosa 206        | 66.0 | Contig   | AstraZeneca                          |
| GCA_000793485 | Cluster_53 | Pseudomonas aeruginosa 215        | 65.8 | Contig   | AstraZeneca                          |
| GCA_000481545 | Cluster_53 | Pseudomonas aeruginosa BWHPSA008  | 66.3 | Scaffold | Broad Institute                      |
| GCA_000480885 | Cluster_53 | Pseudomonas aeruginosa BL13       | 65.9 | Scaffold | Broad Institute                      |
| GCA_000791125 | Cluster_53 | Pseudomonas aeruginosa 95         | 66.1 | Contig   | AstraZeneca                          |
| GCA_000414255 | Cluster_53 | Pseudomonas aeruginosa PAO1-CipR  | 66.1 | Contig   | Boise State University               |
| GCA_000795815 | Cluster_53 | Pseudomonas aeruginosa 326        | 66.1 | Contig   | AstraZeneca                          |
| GCA_000790115 | Cluster_53 | Pseudomonas aeruginosa 45         | 66.5 | Contig   | AstraZeneca                          |
| GCA_000481645 | Cluster_53 | Pseudomonas aeruginosa BWHPSA003  | 66.0 | Scaffold | Broad Institute                      |



|               |            |                                    |      |          |                             |
|---------------|------------|------------------------------------|------|----------|-----------------------------|
| GCA_000412295 | Cluster_53 | Pseudomonas aeruginosa str. C 1334 | 66.4 | Contig   | University of Strathclyde   |
| GCA_000791945 | Cluster_53 | Pseudomonas aeruginosa 136         | 66.0 | Contig   | AstraZeneca                 |
| GCA_000789535 | Cluster_53 | Pseudomonas aeruginosa 16          | 66.1 | Contig   | AstraZeneca                 |
| GCA_000792385 | Cluster_53 | Pseudomonas aeruginosa 160         | 66.1 | Contig   | AstraZeneca                 |
| GCA_000795665 | Cluster_53 | Pseudomonas aeruginosa 318         | 66.1 | Contig   | AstraZeneca                 |
| GCA_000481805 | Cluster_53 | Pseudomonas aeruginosa JJ692       | 66.1 | Scaffold | Broad Institute             |
| GCA_000790145 | Cluster_53 | Pseudomonas aeruginosa 46          | 65.6 | Contig   | AstraZeneca                 |
| GCA_000792225 | Cluster_53 | Pseudomonas aeruginosa 150         | 66.2 | Contig   | AstraZeneca                 |
| GCA_000629585 | Cluster_53 | Pseudomonas aeruginosa BWH050      | 66.3 | Scaffold | Broad Institute             |
| GCA_000792165 | Cluster_53 | Pseudomonas aeruginosa 148         | 65.8 | Contig   | AstraZeneca                 |
| GCA_000792345 | Cluster_53 | Pseudomonas aeruginosa 158         | 66.1 | Contig   | AstraZeneca                 |
| GCA_000629305 | Cluster_53 | Pseudomonas aeruginosa 3574        | 66.4 | Scaffold | Broad Institute             |
| GCA_000568235 | Cluster_53 | Pseudomonas aeruginosa CF_PA39     | 66.4 | Contig   | Vrije Universiteit Brussel  |
| GCA_000796825 | Cluster_53 | Pseudomonas aeruginosa 385         | 66.3 | Contig   | AstraZeneca                 |
| GCA_000792095 | Cluster_53 | Pseudomonas aeruginosa 144         | 66.5 | Contig   | AstraZeneca                 |
| GCA_000796405 | Cluster_53 | Pseudomonas aeruginosa 364         | 66.0 | Contig   | AstraZeneca                 |
| GCA_000795485 | Cluster_53 | Pseudomonas aeruginosa 309         | 65.7 | Contig   | AstraZeneca                 |
| GCA_000404265 | Cluster_53 | Pseudomonas aeruginosa PA14        | 66.3 | Scaffold | Broad Institute             |
| GCA_000791805 | Cluster_53 | Pseudomonas aeruginosa 129         | 65.8 | Contig   | AstraZeneca                 |
| GCA_000796225 | Cluster_53 | Pseudomonas aeruginosa 355         | 66.1 | Contig   | AstraZeneca                 |
| GCA_000796285 | Cluster_53 | Pseudomonas aeruginosa 358         | 65.9 | Contig   | AstraZeneca                 |
| GCA_000795955 | Cluster_53 | Pseudomonas aeruginosa 342         | 66.0 | Contig   | AstraZeneca                 |
| GCA_000480825 | Cluster_53 | Pseudomonas aeruginosa BL16        | 66.0 | Scaffold | Broad Institute             |
| GCA_000756575 | Cluster_53 | Pseudomonas aeruginosa 7           | 66.3 | Contig   | UDRI                        |
| GCA_000789885 | Cluster_53 | Pseudomonas aeruginosa 33          | 65.9 | Contig   | AstraZeneca                 |
| GCA_000793595 | Cluster_53 | Pseudomonas aeruginosa 218         | 66.4 | Contig   | AstraZeneca                 |
| GCA_000793805 | Cluster_53 | Pseudomonas aeruginosa 228         | 66.1 | Contig   | AstraZeneca                 |
| GCA_000482025 | Cluster_53 | Pseudomonas aeruginosa 62          | 66.3 | Scaffold | Broad Institute             |
| GCA_000795385 | Cluster_53 | Pseudomonas aeruginosa 304         | 66.1 | Contig   | AstraZeneca                 |
| GCA_000790655 | Cluster_53 | Pseudomonas aeruginosa 72          | 66.4 | Contig   | AstraZeneca                 |
| GCA_000792665 | Cluster_53 | Pseudomonas aeruginosa 174         | 66.0 | Contig   | AstraZeneca                 |
| GCA_000792605 | Cluster_53 | Pseudomonas aeruginosa 171         | 66.0 | Contig   | AstraZeneca                 |
| GCA_000789705 | Cluster_53 | Pseudomonas aeruginosa 24          | 66.0 | Contig   | AstraZeneca                 |
| GCA_000789755 | Cluster_53 | Pseudomonas aeruginosa 27          | 66.4 | Contig   | AstraZeneca                 |
| GCA_000568115 | Cluster_53 | Pseudomonas aeruginosa RB-48       | 66.5 | Contig   | UNIVERSITY OF MALAYA        |
| GCA_000793225 | Cluster_53 | Pseudomonas aeruginosa 202         | 66.2 | Contig   | AstraZeneca                 |
| GCA_000439855 | Cluster_53 | Pseudomonas aeruginosa LCT-PA220   | 66.2 | Scaffold | BGI Research Institute      |
| GCA_000481365 | Cluster_53 | Pseudomonas aeruginosa BWHPSA017   | 66.0 | Scaffold | Broad Institute             |
| GCA_000791065 | Cluster_53 | Pseudomonas aeruginosa 92          | 66.2 | Contig   | AstraZeneca                 |
| GCA_000481825 | Cluster_53 | Pseudomonas aeruginosa S54485      | 66.0 | Scaffold | Broad Institute             |
| GCA_000481905 | Cluster_53 | Pseudomonas aeruginosa CF27        | 66.3 | Scaffold | Broad Institute             |
| GCA_000480985 | Cluster_53 | Pseudomonas aeruginosa BL08        | 65.9 | Scaffold | Broad Institute             |
| GCA_000794845 | Cluster_53 | Pseudomonas aeruginosa 277         | 66.1 | Contig   | AstraZeneca                 |
| GCA_000797245 | Cluster_53 | Pseudomonas aeruginosa 406         | 66.2 | Contig   | AstraZeneca                 |
| GCA_000506005 | Cluster_53 | Pseudomonas aeruginosa JD318       | 66.5 | Contig   | University of Ottawa        |
| GCA_000481685 | Cluster_53 | Pseudomonas aeruginosa BWHPSA001   | 66.4 | Scaffold | Broad Institute             |
| GCA_000247455 | Cluster_53 | Pseudomonas aeruginosa MPAO1/P2    | 66.5 | Contig   | Argonne National Laboratory |
| GCA_000790025 | Cluster_53 | Pseudomonas aeruginosa 40          | 66.0 | Contig   | AstraZeneca                 |
| GCA_000791085 | Cluster_53 | Pseudomonas aeruginosa 93          | 65.8 | Contig   | AstraZeneca                 |

|               |            |                                    |      |                      |                                                |
|---------------|------------|------------------------------------|------|----------------------|------------------------------------------------|
| GCA_000795505 | Cluster_53 | Pseudomonas aeruginosa 310         | 66.0 | Contig               | AstraZeneca                                    |
| GCA_000795525 | Cluster_53 | Pseudomonas aeruginosa 311         | 65.9 | Contig               | AstraZeneca                                    |
| GCA_000790085 | Cluster_53 | Pseudomonas aeruginosa 43          | 66.2 | Contig               | AstraZeneca                                    |
| GCA_000790155 | Cluster_53 | Pseudomonas aeruginosa 47          | 66.6 | Contig               | AstraZeneca                                    |
| GCA_000615485 | Cluster_53 | Pseudomonas aeruginosa JCM 5962    | 66.3 | Contig               | The University of Tokyo                        |
| GCA_000017205 | Cluster_53 | Pseudomonas aeruginosa PA7         | 66.4 | Complete Genome      | J. Craig Venter Institute                      |
| GCA_000796955 | Cluster_53 | Pseudomonas aeruginosa 392         | 66.1 | Contig               | AstraZeneca                                    |
| GCA_000520455 | Cluster_53 | Pseudomonas aeruginosa BWHPA037    | 65.6 | Scaffold             | Broad Institute                                |
| GCA_000287815 | Cluster_53 | Pseudomonas aeruginosa N002        | 66.8 | Contig               | CSIR-NEIST, Jorhat                             |
| GCA_000795845 | Cluster_53 | Pseudomonas aeruginosa 327         | 66.1 | Contig               | AstraZeneca                                    |
| GCA_000480415 | Cluster_53 | Pseudomonas aeruginosa C51         | 66.1 | Scaffold             | Broad Institute                                |
| GCA_000797165 | Cluster_53 | Pseudomonas aeruginosa 402         | 66.3 | Contig               | AstraZeneca                                    |
| GCA_000297275 | Cluster_53 | Pseudomonas aeruginosa ATCC 14886  | 66.4 | Contig               | University of Washington                       |
| GCA_000468935 | Cluster_53 | Pseudomonas aeruginosa c7447m      | 66.5 | Chromosome with gaps | Marshall University School of Medicine         |
| GCA_000789965 | Cluster_53 | Pseudomonas aeruginosa 37          | 66.5 | Contig               | AstraZeneca                                    |
| GCA_000412535 | Cluster_53 | Pseudomonas aeruginosa str. C 1433 | 66.3 | Contig               | University of Strathclyde                      |
| GCA_000794925 | Cluster_53 | Pseudomonas aeruginosa 281         | 65.8 | Contig               | AstraZeneca                                    |
| GCA_000282915 | Cluster_53 | Pseudomonas aeruginosa MRW44.1     | 66.5 | Contig               | Michigan State University                      |
| GCA_000297335 | Cluster_53 | Pseudomonas aeruginosa CI27        | 66.1 | Contig               | University of Washington                       |
| GCA_000795925 | Cluster_53 | Pseudomonas aeruginosa 340         | 66.5 | Contig               | AstraZeneca                                    |
| GCA_000520375 | Cluster_53 | Pseudomonas aeruginosa BWHPA041    | 65.9 | Scaffold             | Broad Institute                                |
| GCA_000789995 | Cluster_53 | Pseudomonas aeruginosa 39          | 66.1 | Contig               | AstraZeneca                                    |
| GCA_000506885 | Cluster_53 | Pseudomonas aeruginosa VRFPA08     | 66.1 | Contig               | SANKARA NETHRALAYA, VISION RESEARCH FOUNDATION |
| GCA_000794045 | Cluster_53 | Pseudomonas aeruginosa 240         | 66.3 | Contig               | AstraZeneca                                    |
| GCA_000480555 | Cluster_53 | Pseudomonas aeruginosa M8A.4       | 66.5 | Scaffold             | Broad Institute                                |
| GCA_000791835 | Cluster_53 | Pseudomonas aeruginosa 131         | 65.9 | Contig               | AstraZeneca                                    |
| GCA_000797345 | Cluster_53 | Pseudomonas aeruginosa 411         | 65.8 | Contig               | AstraZeneca                                    |
| GCA_000796325 | Cluster_53 | Pseudomonas aeruginosa 360         | 66.6 | Contig               | AstraZeneca                                    |
| GCA_000481185 | Cluster_53 | Pseudomonas aeruginosa BWHPA026    | 66.0 | Scaffold             | Broad Institute                                |
| GCA_000359505 | Cluster_53 | Pseudomonas aeruginosa B136-33     | 66.4 | Complete Genome      | National Tsing Hua University                  |
| GCA_000506365 | Cluster_53 | Pseudomonas aeruginosa JD335       | 66.4 | Contig               | University of Ottawa                           |
| GCA_000481085 | Cluster_53 | Pseudomonas aeruginosa BL03        | 66.1 | Scaffold             | Broad Institute                                |
| GCA_000026645 | Cluster_53 | Pseudomonas aeruginosa LESB58      | 66.3 | Complete Genome      | Wellcome Trust Sanger Institute                |
| GCA_000791465 | Cluster_53 | Pseudomonas aeruginosa 112         | 66.4 | Contig               | AstraZeneca                                    |
| GCA_000793085 | Cluster_53 | Pseudomonas aeruginosa 195         | 66.1 | Contig               | AstraZeneca                                    |
| GCA_000629225 | Cluster_53 | Pseudomonas aeruginosa 3578        | 66.2 | Scaffold             | Broad Institute                                |
| GCA_000710625 | Cluster_53 | Pseudomonas aeruginosa 2           | 66.5 | Contig               | Walter Reed Army Institute of Research         |
| GCA_000792245 | Cluster_53 | Pseudomonas aeruginosa 153         | 66.5 | Contig               | AstraZeneca                                    |
| GCA_000793005 | Cluster_53 | Pseudomonas aeruginosa 191         | 66.1 | Contig               | AstraZeneca                                    |
| GCA_000789625 | Cluster_53 | Pseudomonas aeruginosa 20          | 65.9 | Contig               | AstraZeneca                                    |
| GCA_000795265 | Cluster_53 | Pseudomonas aeruginosa 298         | 66.1 | Contig               | AstraZeneca                                    |
| GCA_000792205 | Cluster_53 | Pseudomonas aeruginosa 149         | 66.0 | Contig               | AstraZeneca                                    |
| GCA_000796525 | Cluster_53 | Pseudomonas aeruginosa 370         | 66.2 | Contig               | AstraZeneca                                    |
| GCA_000790185 | Cluster_53 | Pseudomonas aeruginosa 48          | 65.8 | Contig               | AstraZeneca                                    |
| GCA_000792025 | Cluster_53 | Pseudomonas aeruginosa 140         | 66.4 | Contig               | AstraZeneca                                    |
| GCA_000689435 | Cluster_53 | Pseudomonas aeruginosa MH38        | 65.8 | Contig               | CEBITEC                                        |
| GCA_000558345 | Cluster_53 | Pseudomonas aeruginosa VRFPA09     | 65.3 | Contig               | SANKARA NETHRALAYA, VISION RESEARCH FOUNDATION |
| GCA_000795805 | Cluster_53 | Pseudomonas aeruginosa 325         | 66.0 | Contig               | AstraZeneca                                    |
| GCA_000792785 | Cluster_53 | Pseudomonas aeruginosa 180         | 66.0 | Contig               | AstraZeneca                                    |

|               |            |                                    |      |                 |                                                 |
|---------------|------------|------------------------------------|------|-----------------|-------------------------------------------------|
| GCA_000797205 | Cluster_53 | Pseudomonas aeruginosa 404         | 66.0 | Contig          | AstraZeneca                                     |
| GCA_000481765 | Cluster_53 | Pseudomonas aeruginosa 19660       | 66.2 | Scaffold        | Broad Institute                                 |
| GCA_000791345 | Cluster_53 | Pseudomonas aeruginosa 106         | 66.5 | Contig          | AstraZeneca                                     |
| GCA_000520315 | Cluster_53 | Pseudomonas aeruginosa BWHPA044    | 66.0 | Scaffold        | Broad Institute                                 |
| GCA_000797145 | Cluster_53 | Pseudomonas aeruginosa 401         | 66.3 | Contig          | AstraZeneca                                     |
| GCA_000223925 | Cluster_53 | Pseudomonas aeruginosa 9BR         | 66.1 | Contig          | IBIS, Universite Laval                          |
| GCA_000520295 | Cluster_53 | Pseudomonas aeruginosa BWHPA045    | 65.8 | Scaffold        | Broad Institute                                 |
| GCA_000790565 | Cluster_53 | Pseudomonas aeruginosa 67          | 66.1 | Contig          | AstraZeneca                                     |
| GCA_000795425 | Cluster_53 | Pseudomonas aeruginosa 306         | 66.1 | Contig          | AstraZeneca                                     |
| GCA_000795305 | Cluster_53 | Pseudomonas aeruginosa 300         | 65.9 | Contig          | AstraZeneca                                     |
| GCA_000793825 | Cluster_53 | Pseudomonas aeruginosa 229         | 66.0 | Contig          | AstraZeneca                                     |
| GCA_000791965 | Cluster_53 | Pseudomonas aeruginosa 137         | 66.1 | Contig          | AstraZeneca                                     |
| GCA_000790355 | Cluster_53 | Pseudomonas aeruginosa 57          | 65.5 | Contig          | AstraZeneca                                     |
| GCA_000481705 | Cluster_53 | Pseudomonas aeruginosa X13273      | 66.0 | Scaffold        | Broad Institute                                 |
| GCA_000794885 | Cluster_53 | Pseudomonas aeruginosa 279         | 65.6 | Contig          | AstraZeneca                                     |
| GCA_000796795 | Cluster_53 | Pseudomonas aeruginosa 384         | 66.3 | Contig          | AstraZeneca                                     |
| GCA_000482005 | Cluster_53 | Pseudomonas aeruginosa E2          | 66.4 | Scaffold        | Broad Institute                                 |
| GCA_000520335 | Cluster_53 | Pseudomonas aeruginosa BWHPA043    | 66.0 | Scaffold        | Broad Institute                                 |
| GCA_000794865 | Cluster_53 | Pseudomonas aeruginosa 278         | 65.8 | Contig          | AstraZeneca                                     |
| GCA_000480615 | Cluster_53 | Pseudomonas aeruginosa M8A.1       | 66.4 | Scaffold        | Broad Institute                                 |
| GCA_000737795 | Cluster_53 | Pseudomonas aeruginosa 3           | 66.0 | Contig          | Hospital Universitario 12 de Octubre            |
| GCA_000792115 | Cluster_53 | Pseudomonas aeruginosa 145         | 66.1 | Contig          | AstraZeneca                                     |
| GCA_000629445 | Cluster_53 | Pseudomonas aeruginosa BWH057      | 66.0 | Scaffold        | Broad Institute                                 |
| GCA_000794165 | Cluster_53 | Pseudomonas aeruginosa 244         | 66.0 | Contig          | AstraZeneca                                     |
| GCA_000481285 | Cluster_53 | Pseudomonas aeruginosa BWHPA021    | 66.3 | Scaffold        | Broad Institute                                 |
| GCA_000505805 | Cluster_53 | Pseudomonas aeruginosa PFK10       | 66.8 | Contig          | Saurashtra University                           |
| GCA_000795365 | Cluster_53 | Pseudomonas aeruginosa 303         | 65.6 | Contig          | AstraZeneca                                     |
| GCA_000506105 | Cluster_53 | Pseudomonas aeruginosa JD313       | 66.5 | Contig          | University of Ottawa                            |
| GCA_000629605 | Cluster_53 | Pseudomonas aeruginosa BWH049      | 66.3 | Scaffold        | Broad Institute                                 |
| GCA_000271985 | Cluster_53 | Pseudomonas aeruginosa SJTD-1      | 66.8 | Contig          | Shanghai Jiao Tong University                   |
| GCA_000797355 | Cluster_53 | Pseudomonas aeruginosa 412         | 66.2 | Contig          | AstraZeneca                                     |
| GCA_000795765 | Cluster_53 | Pseudomonas aeruginosa 323         | 66.0 | Contig          | AstraZeneca                                     |
| GCA_000794945 | Cluster_53 | Pseudomonas aeruginosa 282         | 66.0 | Contig          | AstraZeneca                                     |
| GCA_000791785 | Cluster_53 | Pseudomonas aeruginosa 128         | 66.4 | Contig          | AstraZeneca                                     |
| GCA_000760495 | Cluster_53 | Pseudomonas aeruginosa 11          | 66.0 | Contig          | Center for Cellular and Molecular Biology(CCMB) |
| GCA_000790385 | Cluster_53 | Pseudomonas aeruginosa 58          | 66.5 | Contig          | AstraZeneca                                     |
| GCA_000789935 | Cluster_53 | Pseudomonas aeruginosa 36          | 65.8 | Contig          | AstraZeneca                                     |
| GCA_000794055 | Cluster_53 | Pseudomonas aeruginosa 241         | 66.1 | Contig          | AstraZeneca                                     |
| GCA_000705215 | Cluster_53 | Pseudomonas aeruginosa C2159M      | 66.5 | Contig          | University of Texas at Austin                   |
| GCA_000793045 | Cluster_53 | Pseudomonas aeruginosa 193         | 66.1 | Contig          | AstraZeneca                                     |
| GCA_000480805 | Cluster_53 | Pseudomonas aeruginosa BL17        | 66.0 | Scaffold        | Broad Institute                                 |
| GCA_000006765 | Cluster_53 | Pseudomonas aeruginosa PAO1        | 66.6 | Complete Genome | PathoGenesis Corporation                        |
| GCA_000793915 | Cluster_53 | Pseudomonas aeruginosa 234         | 66.2 | Contig          | AstraZeneca                                     |
| GCA_000412735 | Cluster_53 | Pseudomonas aeruginosa PGPR2       | 66.0 | Contig          | Madurai Kamaraj University                      |
| GCA_000412555 | Cluster_53 | Pseudomonas aeruginosa str. C 1426 | 66.4 | Contig          | University of Strathclyde                       |
| GCA_000789905 | Cluster_53 | Pseudomonas aeruginosa 34          | 66.1 | Contig          | AstraZeneca                                     |
| GCA_000481785 | Cluster_53 | Pseudomonas aeruginosa U2504       | 65.9 | Scaffold        | Broad Institute                                 |
| GCA_000794335 | Cluster_53 | Pseudomonas aeruginosa 253         | 65.4 | Contig          | AstraZeneca                                     |
| GCA_000796765 | Cluster_53 | Pseudomonas aeruginosa 382         | 66.5 | Contig          | AstraZeneca                                     |

|               |            |                                    |      |                      |                                                     |
|---------------|------------|------------------------------------|------|----------------------|-----------------------------------------------------|
| GCA_000792765 | Cluster_53 | Pseudomonas aeruginosa 179         | 66.1 | Contig               | AstraZeneca                                         |
| GCA_000791735 | Cluster_53 | Pseudomonas aeruginosa 126         | 66.2 | Contig               | AstraZeneca                                         |
| GCA_000797325 | Cluster_53 | Pseudomonas aeruginosa 410         | 66.5 | Contig               | AstraZeneca                                         |
| GCA_000520215 | Cluster_53 | Pseudomonas aeruginosa Z61         | 66.3 | Scaffold             | Broad Institute                                     |
| GCA_000480925 | Cluster_53 | Pseudomonas aeruginosa BL11        | 65.9 | Scaffold             | Broad Institute                                     |
| GCA_000791205 | Cluster_53 | Pseudomonas aeruginosa 99          | 66.1 | Contig               | AstraZeneca                                         |
| GCA_000629485 | Cluster_53 | Pseudomonas aeruginosa BWH055      | 66.3 | Scaffold             | Broad Institute                                     |
| GCA_000790865 | Cluster_53 | Pseudomonas aeruginosa 82          | 66.4 | Contig               | AstraZeneca                                         |
| GCA_000792975 | Cluster_53 | Pseudomonas aeruginosa 190         | 66.1 | Contig               | AstraZeneca                                         |
| GCA_000572265 | Cluster_53 | Pseudomonas aeruginosa BK1         | 66.3 | Contig               | Aravind Medical Research Foundation                 |
| GCA_000615565 | Cluster_53 | Pseudomonas aeruginosa JCM 14847   | 66.3 | Contig               | The University of Tokyo                             |
| GCA_000794545 | Cluster_53 | Pseudomonas aeruginosa 262         | 65.6 | Contig               | AstraZeneca                                         |
| GCA_000583915 | Cluster_53 | Pseudomonas aeruginosa LESlike7    | 66.5 | Chromosome with gaps | IBIS, University Laval                              |
| GCA_000506805 | Cluster_53 | Pseudomonas aeruginosa VRFPA07     | 65.9 | Contig               | SANKARA NETHRALAYA, VISION RESEARCH FOUNDATION      |
| GCA_000506085 | Cluster_53 | Pseudomonas aeruginosa JD306       | 66.4 | Contig               | University of Ottawa                                |
| GCA_000629105 | Cluster_53 | Pseudomonas aeruginosa BWH031      | 66.2 | Scaffold             | Broad Institute                                     |
| GCA_000792575 | Cluster_53 | Pseudomonas aeruginosa 170         | 66.4 | Contig               | AstraZeneca                                         |
| GCA_000611975 | Cluster_53 | Pseudomonas aeruginosa PA103       | 66.1 | Scaffold             | Northwestern University Feinberg School of Medicine |
| GCA_000795785 | Cluster_53 | Pseudomonas aeruginosa 324         | 66.3 | Contig               | AstraZeneca                                         |
| GCA_000790065 | Cluster_53 | Pseudomonas aeruginosa 42          | 66.2 | Contig               | AstraZeneca                                         |
| GCA_000792925 | Cluster_53 | Pseudomonas aeruginosa 187         | 66.4 | Contig               | AstraZeneca                                         |
| GCA_000786485 | Cluster_53 | Pseudomonas aeruginosa WS394       | 66.1 | Contig               | CEBITEC                                             |
| GCA_000789845 | Cluster_53 | Pseudomonas aeruginosa 32          | 65.9 | Contig               | AstraZeneca                                         |
| GCA_000793285 | Cluster_53 | Pseudomonas aeruginosa 205         | 66.3 | Contig               | AstraZeneca                                         |
| GCA_000793505 | Cluster_53 | Pseudomonas aeruginosa 216         | 65.7 | Contig               | AstraZeneca                                         |
| GCA_000412515 | Cluster_53 | Pseudomonas aeruginosa str. J 1385 | 66.1 | Contig               | University of Strathclyde                           |
| GCA_000796605 | Cluster_53 | Pseudomonas aeruginosa 374         | 65.9 | Contig               | AstraZeneca                                         |
| GCA_000791005 | Cluster_53 | Pseudomonas aeruginosa 89          | 66.0 | Contig               | AstraZeneca                                         |
| GCA_000790425 | Cluster_53 | Pseudomonas aeruginosa 60          | 65.9 | Contig               | AstraZeneca                                         |
| GCA_000794675 | Cluster_53 | Pseudomonas aeruginosa 269         | 66.2 | Contig               | AstraZeneca                                         |
| GCA_000791905 | Cluster_53 | Pseudomonas aeruginosa 134         | 65.9 | Contig               | AstraZeneca                                         |
| GCA_000796785 | Cluster_53 | Pseudomonas aeruginosa 383         | 66.4 | Contig               | AstraZeneca                                         |
| GCA_000796445 | Cluster_53 | Pseudomonas aeruginosa 366         | 66.5 | Contig               | AstraZeneca                                         |
| GCA_000505905 | Cluster_53 | Pseudomonas aeruginosa JD304       | 66.5 | Contig               | University of Ottawa                                |
| GCA_000793905 | Cluster_53 | Pseudomonas aeruginosa 233         | 66.4 | Contig               | AstraZeneca                                         |
| GCA_000794425 | Cluster_53 | Pseudomonas aeruginosa 256         | 66.5 | Contig               | AstraZeneca                                         |
| GCA_000480535 | Cluster_53 | Pseudomonas aeruginosa M9A.1       | 66.4 | Scaffold             | Broad Institute                                     |
| GCA_000790705 | Cluster_53 | Pseudomonas aeruginosa 74          | 65.8 | Contig               | AstraZeneca                                         |
| GCA_000481165 | Cluster_53 | Pseudomonas aeruginosa BWHPSA027   | 66.0 | Scaffold             | Broad Institute                                     |
| GCA_000790905 | Cluster_53 | Pseudomonas aeruginosa 84          | 66.0 | Contig               | AstraZeneca                                         |
| GCA_000792845 | Cluster_53 | Pseudomonas aeruginosa 183         | 65.9 | Contig               | AstraZeneca                                         |
| GCA_000629085 | Cluster_53 | Pseudomonas aeruginosa BWH032      | 66.3 | Scaffold             | Broad Institute                                     |
| GCA_000743405 | Cluster_53 | Pseudomonas aeruginosa 4           | 66.1 | Scaffold             | Los Alamos National Laboratory                      |
| GCA_000790285 | Cluster_53 | Pseudomonas aeruginosa 53          | 66.5 | Contig               | AstraZeneca                                         |
| GCA_000796685 | Cluster_53 | Pseudomonas aeruginosa 378         | 66.4 | Contig               | AstraZeneca                                         |
| GCA_000480705 | Cluster_53 | Pseudomonas aeruginosa BL22        | 66.1 | Scaffold             | Broad Institute                                     |
| GCA_000792465 | Cluster_53 | Pseudomonas aeruginosa 164         | 66.1 | Contig               | AstraZeneca                                         |
| GCA_000468555 | Cluster_53 | Pseudomonas aeruginosa PA0581      | 66.5 | Chromosome with gaps | Marshall University School of Medicine              |
| GCA_000790885 | Cluster_53 | Pseudomonas aeruginosa 83          | 66.1 | Contig               | AstraZeneca                                         |

|               |            |                                                               |      |                 |                                                                    |
|---------------|------------|---------------------------------------------------------------|------|-----------------|--------------------------------------------------------------------|
| GCA_000287875 | Cluster_53 | <i>Pseudomonas aeruginosa</i> AH16                            | 66.1 | Contig          | Anhui University of Traditional Chinese Medicine                   |
| GCA_000790545 | Cluster_53 | <i>Pseudomonas aeruginosa</i> 66                              | 66.1 | Contig          | AstraZeneca                                                        |
| GCA_000792445 | Cluster_53 | <i>Pseudomonas aeruginosa</i> 163                             | 66.2 | Contig          | AstraZeneca                                                        |
| GCA_000794555 | Cluster_53 | <i>Pseudomonas aeruginosa</i> 263                             | 66.1 | Contig          | AstraZeneca                                                        |
| GCA_000794905 | Cluster_53 | <i>Pseudomonas aeruginosa</i> 280                             | 65.6 | Contig          | AstraZeneca                                                        |
| GCA_000508765 | Cluster_53 | <i>Pseudomonas aeruginosa</i> LES431                          | 66.3 | Complete Genome | IBIS, University Laval                                             |
| GCA_000795325 | Cluster_53 | <i>Pseudomonas aeruginosa</i> 301                             | 66.4 | Contig          | AstraZeneca                                                        |
| GCA_000455425 | Cluster_53 | <i>Pseudomonas aeruginosa</i> B3-CFI                          | 66.2 | Contig          | DTU                                                                |
| GCA_000796205 | Cluster_53 | <i>Pseudomonas aeruginosa</i> 354                             | 65.8 | Contig          | AstraZeneca                                                        |
| GCA_000506145 | Cluster_53 | <i>Pseudomonas aeruginosa</i> JD317                           | 66.5 | Contig          | University of Ottawa                                               |
| GCA_000790105 | Cluster_53 | <i>Pseudomonas aeruginosa</i> 44                              | 65.7 | Contig          | AstraZeneca                                                        |
| GCA_000790265 | Cluster_53 | <i>Pseudomonas aeruginosa</i> 52                              | 66.1 | Contig          | AstraZeneca                                                        |
| GCA_000510745 | Cluster_54 | <i>Pseudomonas</i> sp. MOIL14HWK12:12                         | 66.2 | Scaffold        | JGI                                                                |
| GCA_000510705 | Cluster_54 | <i>Pseudomonas</i> sp. MOIL14HWK12:11                         | 66.3 | Scaffold        | JGI                                                                |
| GCA_000236825 | Cluster_54 | <i>Pseudomonas psychrotolerans</i> L19                        | 65.7 | Contig          | Soil, Water and Environmental Science, University of Arizona       |
| GCA_000730625 | Cluster_54 | <i>Pseudomonas oryzae</i> NBRC 102199                         | 66.2 | Contig          | National Institute of Technology and Evaluation                    |
| GCA_000316965 | Cluster_54 | <i>Pseudomonas</i> sp. 313                                    | 65.3 | Contig          | San Diego State University                                         |
| GCA_000510765 | Cluster_54 | <i>Pseudomonas oleovorans</i> MOIL14HWK12                     | 66.3 | Scaffold        | JGI                                                                |
| GCA_000280765 | Singleton  | <i>Pseudomonas gingeri</i> NCPPB 3146                         | 62.6 | Scaffold        | University of Oxford                                               |
| GCA_000009225 | Singleton  | <i>Pseudomonas fluorescens</i> SBW25                          | 60.5 | Complete Genome | Wellcome Trust Sanger Institute                                    |
| GCA_000166515 | Singleton  | <i>Pseudomonas fluorescens</i> WH6                            | 60.6 | Chromosome      | Oregon State University                                            |
| GCA_000281895 | Singleton  | <i>Pseudomonas fluorescens</i> Q2-87                          | 60.6 | Chromosome      | USDA - Agricultural Research Service, USA                          |
| GCA_000293885 | Singleton  | <i>Pseudomonas fluorescens</i> NCIMB 11764                    | 59.0 | Chromosome      | University of North Texas                                          |
| GCA_000217955 | Singleton  | <i>Pseudomonas fluorescens</i> HK44                           | 58.7 | Scaffold        | Center for Environmental Biotechnology                             |
| GCA_000280805 | Singleton  | <i>Pseudomonas fluorescens</i> NZ007                          | 60.0 | Scaffold        | The Sainsbury Laboratory                                           |
| GCA_000346775 | Singleton  | <i>Pseudomonas fluorescens</i> Pf29Arp                        | 60.9 | Scaffold        | INRA                                                               |
| GCA_000308175 | Singleton  | <i>Pseudomonas fluorescens</i> BS2                            | 60.6 | Contig          | LSHTM                                                              |
| GCA_000019125 | Singleton  | <i>Pseudomonas putida</i> GB-1                                | 61.9 | Complete Genome | US DOE Joint Genome Institute (JGI-PGF)                            |
| GCA_000019445 | Singleton  | <i>Pseudomonas putida</i> W619                                | 61.4 | Complete Genome | US DOE Joint Genome Institute                                      |
| GCA_000319305 | Singleton  | <i>Pseudomonas putida</i> CSV86                               | 63.1 | Contig          | National Environmental Engineering Research Institute (NEERI)      |
| GCA_000452865 | Singleton  | <i>Pseudomonas syringae</i> UB246                             | 57.1 | Scaffold        | University of Arizona                                              |
| GCA_000026105 | Singleton  | <i>Pseudomonas entomophila</i> L48                            | 64.2 | Complete Genome | Genoscope                                                          |
| GCA_000661915 | Singleton  | <i>Pseudomonas stutzeri</i>                                   | 62.2 | Complete Genome | Univesitat de les Illes Balears (UIB)                              |
| GCA_000307775 | Singleton  | <i>Pseudomonas stutzeri</i> KOS6                              | 62.9 | Scaffold        | RIPCM                                                              |
| GCA_000455665 | Singleton  | <i>Pseudomonas stutzeri</i> MF28                              | 62.3 | Contig          | University of Illinois at Chicago                                  |
| GCA_000145845 | Singleton  | <i>Pseudomonas syringae</i> pv. <i>maculicola</i> str. ES4326 | 58.5 | Scaffold        | University of North Carolina at Chapel Hill                        |
| GCA_000585995 | Singleton  | <i>Pseudomonas brassicaearum</i>                              | 60.5 | Complete Genome | University of Manitoba                                             |
| GCA_000262065 | Singleton  | <i>Pseudomonas pseudoalcaligenes</i> KF707                    | 65.3 | Contig          | Dipartimento di Bioscienze, Biotecnologie e Scienze Farmacologiche |
| GCA_000626735 | Singleton  | <i>Pseudomonas pseudoalcaligenes</i> AD6                      | 62.5 | Contig          | University of Minnesota                                            |
| GCA_000280785 | Singleton  | <i>Pseudomonas agarici</i> NCPPB 2289                         | 59.1 | Scaffold        | The Sainsbury Laboratory                                           |
| GCA_000242115 | Singleton  | <i>Pseudomonas extremaustralis</i> 14-3 substr. 14-3b         | 60.7 | Contig          | INDEAR                                                             |
| GCA_000250615 | Singleton  | <i>Pseudomonas fragi</i> B25                                  | 59.4 | Scaffold        | Nanjing Normal University                                          |
| GCA_000364705 | Singleton  | <i>Pseudomonas fuscovaginae</i> SE-1                          | 63.1 | Contig          | Colorado State University                                          |
| GCA_000467025 | Singleton  | <i>Pseudomonas fuscovaginae</i> DAR 77800                     | 61.1 | Contig          | Charles Sturt University                                           |
| GCA_000689415 | Singleton  | <i>Pseudomonas knackmussii</i> B13                            | 65.6 | Complete Genome | CHUV-UNIL                                                          |
| GCA_000508205 | Singleton  | <i>Pseudomonas</i> sp. TKP                                    | 60.5 | Complete Genome | Tohoku University                                                  |
| GCA_000478505 | Singleton  | <i>Pseudomonas</i> sp. HPPB0071                               | 55.2 | Scaffold        | Broad Institute                                                    |
| GCA_000483465 | Singleton  | <i>Pseudomonas</i> sp. LAIL14HWK12:17                         | 62.5 | Scaffold        | DOE Joint Genome Institute                                         |
| GCA_000514375 | Singleton  | <i>Pseudomonas</i> sp. LAMO17WK12:12                          | 61.0 | Scaffold        | DOE Joint Genome Institute                                         |

|               |           |                                                     |      |                 |                                                                                                                              |
|---------------|-----------|-----------------------------------------------------|------|-----------------|------------------------------------------------------------------------------------------------------------------------------|
| GCA_000514395 | Singleton | <i>Pseudomonas</i> sp. URMO17WK12:112               | 59.1 | Scaffold        | DOE Joint Genome Institute                                                                                                   |
| GCA_000620245 | Singleton | <i>Pseudomonas</i> sp. URHB0015                     | 60.6 | Scaffold        | DOE Joint Genome Institute                                                                                                   |
| GCA_000620365 | Singleton | <i>Pseudomonas</i> sp. URMO17WK12:18                | 62.8 | Scaffold        | DOE Joint Genome Institute                                                                                                   |
| GCA_000222125 | Singleton | <i>Pseudomonas</i> sp. S9                           | 56.5 | Contig          | Key Laboratory of Marine Biogenetic Resources, Third Institute of Oceanography, State Oceanic Administration (SOA), PR China |
| GCA_000263855 | Singleton | <i>Pseudomonas</i> sp. M47T1                        | 62.5 | Contig          | University of Coimbra - Faculty of Life Sciences                                                                             |
| GCA_000282215 | Singleton | <i>Pseudomonas</i> sp. GM21                         | 58.5 | Contig          | Oak Ridge National Lab                                                                                                       |
| GCA_000282395 | Singleton | <i>Pseudomonas</i> sp. GM55                         | 59.7 | Contig          | Oak Ridge National Lab                                                                                                       |
| GCA_000282515 | Singleton | <i>Pseudomonas</i> sp. GM80                         | 59.2 | Contig          | Oak Ridge National Lab                                                                                                       |
| GCA_000282535 | Singleton | <i>Pseudomonas</i> sp. GM84                         | 63.2 | Contig          | Oak Ridge National Lab                                                                                                       |
| GCA_000306015 | Singleton | <i>Pseudomonas</i> sp. Chol1                        | 64.0 | Contig          | University of Muenster                                                                                                       |
| GCA_000346755 | Singleton | <i>Pseudomonas</i> sp. CBZ-4                        | 61.2 | Contig          | Harbin Institute of Technology                                                                                               |
| GCA_000416155 | Singleton | <i>Pseudomonas</i> sp. CF149                        | 57.5 | Contig          | Boise State University                                                                                                       |
| GCA_000416215 | Singleton | <i>Pseudomonas</i> sp. CF161                        | 62.6 | Contig          | Boise State University                                                                                                       |
| GCA_000418555 | Singleton | <i>Pseudomonas</i> sp. P818                         | 63.4 | Contig          | Institute of Crop Sciences, Chinese Academy of Agricultural Sciences                                                         |
| GCA_000465935 | Singleton | <i>Pseudomonas</i> sp. EGD-AK9                      | 65.6 | Contig          | National Environmental Engineering Research Institute                                                                        |
| GCA_000474765 | Singleton | <i>Pseudomonas</i> sp. CMAA1215                     | 63.8 | Contig          | Embrapa                                                                                                                      |
| GCA_000582595 | Singleton | <i>Pseudomonas</i> sp. BAY1663                      | 65.0 | Contig          | Bay Zoltan Nonprofit Ltd for Applied Research                                                                                |
| GCA_000612585 | Singleton | <i>Pseudomonas</i> sp. CHM02                        | 60.9 | Contig          | Korea Research Institute of Bioscience and Biotechnology                                                                     |
| GCA_000632245 | Singleton | <i>Pseudomonas</i> sp. RIT357                       | 59.8 | Contig          | Monash University Malaysia                                                                                                   |
| GCA_000633395 | Singleton | <i>Pseudomonas</i> sp. PH1b                         | 62.9 | Contig          | University of Malaya                                                                                                         |
| GCA_000690905 | Singleton | <i>Pseudomonas</i> sp. Ant30-3                      | 58.6 | Contig          | University of Alabama at Birmingham                                                                                          |
| GCA_000282975 | Singleton | <i>Pseudomonas psychrophila</i> HA-4                | 56.4 | Contig          | Harbin Institute of Technology                                                                                               |
| GCA_000467105 | Singleton | <i>Pseudomonas alcaligenes</i> NBRC 14159           | 64.8 | Contig          | National Institute of Technology and Evaluation                                                                              |
| GCA_000425745 | Singleton | <i>Pseudomonas cremoricolorata</i> DSM 17059        | 63.5 | Scaffold        | DOE Joint Genome Institute                                                                                                   |
| GCA_000313755 | Singleton | <i>Pseudomonas nitroreducens</i> TX1                | 64.5 | Contig          | National Central University                                                                                                  |
| GCA_000412695 | Singleton | <i>Pseudomonas resinovorans</i> NBRC 106553         | 65.3 | Complete Genome | National Institute of Technology and Evaluation                                                                              |
| GCA_000423545 | Singleton | <i>Pseudomonas resinovorans</i> DSM 21078           | 63.6 | Scaffold        | DOE Joint Genome Institute                                                                                                   |
| GCA_000425625 | Singleton | <i>Pseudomonas azotifigens</i> DSM 17556            | 67.0 | Scaffold        | DOE Joint Genome Institute                                                                                                   |
| GCA_000425805 | Singleton | <i>Pseudomonas vranovensis</i> DSM 16006            | 61.5 | Scaffold        | DOE Joint Genome Institute                                                                                                   |
| GCA_000349845 | Singleton | <i>Pseudomonas denitrificans</i> ATCC 13867         | 65.2 | Complete Genome | Pusan National University                                                                                                    |
| GCA_000350565 | Singleton | <i>Pseudomonas veronii</i> 1YdBTEX2                 | 60.6 | Contig          | Bacterial Abiotic Stress and Survival Improvement Network - BACSIN                                                           |
| GCA_000410875 | Singleton | <i>Pseudomonas pelagia</i> CL-AP6                   | 57.4 | Contig          | KOPRI                                                                                                                        |
| GCA_000621225 | Singleton | <i>Pseudomonas mosselii</i> DSM 17497               | 64.0 | Scaffold        | DOE Joint Genome Institute                                                                                                   |
| GCA_000498575 | Singleton | <i>Pseudomonas taeanensis</i> MS-3                  | 60.9 | Contig          | Korea Basic Science Institute                                                                                                |
| GCA_000517305 | Singleton | <i>Pseudomonas cichorii</i> JBC1                    | 58.1 | Complete Genome | National Academy of Agricultural Science, RDA                                                                                |
| GCA_000632535 | Singleton | <i>Pseudomonas bauzanensis</i>                      | 61.8 | Contig          | Tianjin University                                                                                                           |
| GCA_000275905 | Singleton | <i>Pseudomonas fluorescens</i> NZ17                 | 63.2 | Contig          | The Sainsbury Laboratory                                                                                                     |
| GCA_000411615 | Singleton | <i>Pseudomonas putida</i> MTCC 5279                 | 62.5 | Contig          | CSIR-National Botanical Research Institute                                                                                   |
| GCA_000730425 | Singleton | <i>Pseudomonas fluorescens</i> 1                    | 60.1 | Complete Genome | Aalborg University                                                                                                           |
| GCA_000730585 | Singleton | <i>Pseudomonas japonica</i> NBRC 103040 = DSM 22348 | 64.1 | Contig          | National Institute of Technology and Evaluation                                                                              |
| GCA_000737245 | Singleton | <i>Pseudomonas syringae</i> 3                       | 57.8 | Contig          | University of Arizona                                                                                                        |
| GCA_000746525 | Singleton | <i>Pseudomonas alkylphenolia</i>                    | 60.6 | Complete Genome | Seoul National University                                                                                                    |
| GCA_000759445 | Singleton | <i>Pseudomonas lutea</i>                            | 60.2 | Contig          | Kyungpook National University                                                                                                |
| GCA_000761545 | Singleton | <i>Pseudomonas</i> sp. ML96                         | 64.8 | Contig          | Institute of Microbiology, ASCR                                                                                              |
| GCA_000800055 | Singleton | <i>Pseudomonas</i> sp. 11/12A                       | 59.6 | Contig          | DOE Joint Genome Institute                                                                                                   |
| GCA_000021045 | NA        | <i>Azotobacter vinelandii</i> DJ                    | 65.7 | Complete Genome | US DOE Joint Genome Institute (JGI-PGF)                                                                                      |
| GCA_000019225 | NA        | <i>Cellvibrio japonicus</i> Ueda107                 | 52.0 | Complete Genome | J. Craig Venter Institute                                                                                                    |
